# Supplementary material for: Reinventing talent management: How to maximize performance in higher education
Source: Frontiers journal article supplement (doi:10.3389/feduc.2022.929697), 2022-09-14
Supplement: Table_1.XLSX [file Table_1.XLSX]

## Sheet: Form Responses 1
Status	Lama Bekerja di PTS	Pendidikan Terakhir	Jabatan Fungsional Dosen	Universitas saya secara aktif membangun reputasi sebagai tempat kerja terbaik bagi para dosen.	Universitas saya melakukan upaya pencitraan merek untuk menarik dosen berbakat.	Universitas saya bergantung pada citra merek internal maupun eksternal untuk menarik dosen berbakat.	Universitas saya kebijakan pengembangan karir disampaikan sangat jelas kepada para dosen.	Universitas saya melakukan perencanaan pengembangan karir para dosen.	Universitas saya memberikan peluang untuk mengembangkan karir.	Universitas saya mengedepankan keseimbangan kehidupan dalam bekerja untuk menjaga motivasi para dosen.	Universitas saya memiliki iklim akademik yang mendukung para dosen.	Universitas saya memiliki kondisi kerja yang baik sehingga dapat menarik dosen berbakat.	Saya secara teratur menerima pelatihan yang memadai.	Universitas saya memberikan peluang untuk mengembangkan para dosen berbakat.	Universitas saya memiliki materi pelatihan yang memadai untuk meningkatkan pengetahuan dan keterampilan para dosen.	Universitas saya melakukan perencanaan kebutuhan pelatihan secara akurat.	Universitas saya mengidentifikasi kompetensi yang dibutuhkan bagi para dosen.	Universitas saya melakukan perencanaan sumber daya manusia untuk memanfaatkan keterampilan para dosen.	Universitas saya telah melakukan strategi pengembangan talenta yang selaras dengan strategi perguruan tinggi.	Universitas saya telah memiliki strategi pengembangan talenta yang dipahami oleh semua dosen.	Univesitas saya melakukan strategi pengembangan talenta untuk memenuhi kebutuhan dosen berbakat.	Universitas saya memiliki sistem kompensasi yang kompetitif didibandingkan dengan perguruan tinggi swasta lain.	Universitas saya mampu memberikan kompensasi yang kompetitif dalam jangka panjang.	Universitas saya berupaya mempertahankan para dosen berbakat yang dibutuhkan untuk mencapai tujuan organisasi.	Universitas saya berusaha untuk menggunakan segala macam cara untuk memotivasi para dosen.	Universitas saya berupaya untuk meningkatkan kepuasan kerja para dosen.	Universitas saya berupaya membuat para dosen selalu termotivasi dalam bekerja.	Universitas saya berupaya mengelola para dosen untuk meningkatkan motivasi kerja.	Universitas saya memberikan penghargaan non-moneter bagi para dosen. (Cth: Benefit, waktu fleksibel, waktu istirahat, parkir gratis atau diskon, diskon keanggotaan gym membership)	Universitas saya memberikan izin bagi para dosen untuk membolehkan pulang lebih awal ketika target yang terpenuhi.	Universitas saya memberikan sistem penghargaan non-finansial untuk mempertahankan dosen berbakat. (contoh. ucapan terima kasih)	Universitas anda mengkategorikan pengetahuan didalam suatu database yang digunakan oleh semua dosen.	Para dosen menggunakan email, kegiatan rapat, dan diskusi untuk berbagi pengetahuan dengan dosen lain.	Universitas saya melakukan penyimpanan informasi penting untuk memudahkan para dosen mendapatkan informasi.	Universitas saya melakukan kegiatan transfer pengalaman satu dosen kepada para dosen lainnya.	Para dosen bersedia untuk berbagi pengetahuan.	Universitas saya mentransfer pengetahuan secara efektif kepada para dosen melalui kursus pelatihan, presentasi atau buletin kampus	Universitas saya melakukan berbagai koordinasi secara intensif pada seluruh divisi/bagian.	Universitas saya menggunakan peran mentor untuk mentransfer pengetahuan bagi para dosen lainnya.	Universitas saya melakukan proses brainstorming untuk menciptakan pengetahuan.	Universitas saya menggunakan alat pembelajaran sebagai sarana kolaborasi pengetahuan.	Universitas saya menggunakan sistem pemecahan masalah berbasis teknologi.	Universitas saya mengadopsi petunjuk keahlian bagi para dosen.	Universitas saya menggunakan akses berbasis web (web-based access) untuk mendapatkan data yang diperlukan.	Universitas saya melakukan penyimpanan informasi yang dapat dipelajari oleh para dosen.	Universitas saya memiliki database atau halaman web yang digunakan untuk sarana ilmu pengetahuan.	Universitas saya melakukan pelatihan di tempat kerja (on the job training) bagi para dosen.	Universitas saya melakukan pembelajaran dengan pendekatan praktik lapangan.	Universitas saya melakukan pembelajaran dengan metode observasi.
Dosen Tetap	10 thn	Doktor	Lektor	5	4	4	4	5	4	3	4	4	5	4	5	4	4	4	4	3	4	4	4	4	4	5	4	4	4	2	4	5	5	4	4	4	4	5	3	2	4	4	4	5	5	5	4	4	3
Dosen Tetap	28 tahun	Doktor	Lektor Kepala	5	5	5	5	5	5	5	5	5	5	5	5	5	5	5	5	5	5	5	5	5	5	5	5	5	5	5	5	5	5	5	5	5	5	5	5	5	5	5	5	5	5	5	5	5	5
Dosen Tetap	7	Magister	Lektor	5	5	5	5	5	5	5	5	5	5	5	5	5	5	5	5	5	5	5	5	5	5	5	5	5	5	5	5	5	5	5	5	5	5	5	5	5	5	5	5	5	5	5	5	5	5
Dosen Tetap	9 tahun	Magister	Lektor	5	4	4	5	5	5	4	4	4	5	4	4	4	5	4	4	4	4	4	4	4	3	5	4	4	5	3	5	5	5	5	5	4	5	4	3	4	4	4	4	5	5	5	3	4	4
Dosen Tetap	18 tahun	Magister	Lektor	5	5	5	3	4	3	3	3	3	5	4	4	3	4	4	4	3	4	3	3	3	3	3	3	3	3	3	5	4	4	4	4	3	4	4	3	4	4	5	4	4	5	4	5	4	3
Dosen Tetap	7 tahun	Magister	Lektor	4	4	4	5	5	4	5	5	4	5	5	5	4	4	4	4	4	4	4	4	4	4	5	4	5	3	4	5	5	5	4	4	4	5	5	4	5	4	5	5	4	5	5	3	3	3
Dosen Tetap	13 tahun	Magister	Asisten Ahli	5	5	5	5	4	4	3	4	3	5	4	5	4	4	4	4	4	4	2	3	4	4	3	3	3	1	2	2	5	4	4	4	4	4	4	4	4	4	4	4	4	5	5	4	3	3
Dosen Tetap	10 tahun	Magister	Asisten Ahli	5	5	5	5	5	5	5	5	5	5	5	5	5	5	5	5	5	5	5	5	5	5	5	5	5	5	5	5	5	5	5	5	5	5	5	5	5	5	5	5	5	5	5	5	5	5
Dosen Tetap	3 tahun	Doktor	Lektor	5	4	4	5	5	5	5	4	4	4	4	4	5	5	5	4	4	4	4	4	4	4	4	4	4	4	4	4	4	4	4	4	4	4	4	4	4	4	4	4	4	4	4	4	4	4
Dosen Tetap	9 tahun	Magister	Lektor	5	5	4	5	5	5	4	4	4	5	4	5	4	4	5	4	4	4	4	4	4	4	5	5	5	5	4	5	5	4	5	4	4	5	4	4	3	4	5	4	5	5	5	3	3	3
Dosen Tetap	2 tahun	Magister	Tenaga Pengajar	4	5	4	4	4	4	5	4	4	4	4	3	4	4	3	5	4	4	5	4	4	4	4	4	4	5	5	4	3	5	4	3	3	4	4	3	4	5	4	4	5	5	5	2	3	3
Dosen Tetap	13 Tahun	Doktor	Lektor	5	5	5	5	5	4	4	5	4	4	4	5	4	4	4	4	4	4	3	3	4	5	3	4	4	3	4	4	4	3	4	5	5	4	5	3	4	4	3	4	4	4	4	4	4	4
Dosen Tetap	12 tahun	Doktor	Lektor	5	4	5	5	4	4	5	5	5	5	5	5	4	4	5	5	5	5	4	5	5	5	4	5	5	5	5	4	5	5	5	4	5	5	5	5	5	4	5	5	5	4	4	5	4	4
Dosen Tetap	13 tahun	Magister	Asisten Ahli	4	4	3	5	5	3	4	5	4	4	5	4	3	4	5	4	4	5	5	4	4	5	4	4	4	5	4	4	4	5	5	4	4	5	5	3	5	4	4	4	5	4	3	4	4	5
Dosen Tetap	5 tahun	Magister	Asisten Ahli	4	4	5	4	5	3	3	5	4	3	4	5	5	3	5	4	4	3	5	3	4	4	3	5	4	5	3	5	5	5	4	5	3	4	3	4	5	5	4	4	3	4	3	4	5	3
Dosen Tetap	12 Tahun	Magister	Lektor	4	3	2	4	4	5	4	4	4	4	4	4	4	5	4	4	3	3	3	3	4	4	4	4	4	3	3	4	3	4	5	3	5	4	4	4	4	4	3	4	5	5	4	3	4	4
Dosen Tetap	18 Tahun	Magister	Lektor	4	5	3	3	4	4	5	4	4	4	5	4	5	3	4	4	3	5	5	3	4	4	4	5	3	3	3	5	5	4	4	3	5	4	4	4	3	4	3	5	4	3	4	4	5	3
Dosen Tetap	6 tahun	Magister	Lektor	4	5	4	4	4	4	3	3	4	5	4	5	3	5	4	4	3	4	5	4	5	3	5	4	5	4	4	5	5	3	3	4	3	3	5	3	4	5	3	5	4	3	4	4	4	3
Dosen Tetap	11 Tahun	Magister	Lektor	4	3	4	3	4	5	4	4	3	4	4	3	3	4	5	4	5	4	3	5	4	4	3	5	4	4	5	3	3	5	4	4	4	4	5	3	3	4	5	3	4	5	3	4	5	4
Dosen Tetap	2 Tahun	Magister	Tenaga Pengajar	4	4	4	4	5	5	5	5	5	5	4	4	4	3	4	4	4	4	5	4	4	4	3	3	3	4	4	4	4	4	4	4	4	4	5	4	4	4	4	3	4	4	4	3	4	4
Dosen Tetap	2 Tahun	Magister	Tenaga Pengajar	3	4	4	5	3	3	5	4	4	4	4	3	5	4	3	4	3	4	5	4	3	5	3	4	4	3	5	5	5	4	4	3	5	3	3	4	5	4	4	5	3	5	4	3	5	3
Dosen Tetap	2 Tahuns	Magister	Tenaga Pengajar	5	4	3	4	5	4	3	4	5	5	3	4	5	4	3	4	5	3	5	4	3	5	4	4	3	5	3	5	4	4	3	4	4	5	4	4	4	5	3	5	3	3	4	5	3	5
Dosen Tetap	2 Tahun	Magister	Tenaga Pengajar	4	5	4	3	4	5	3	3	4	4	5	4	3	4	5	4	4	3	5	4	5	3	5	4	4	5	5	3	4	5	4	3	4	5	4	3	4	5	4	4	5	3	4	4	5	4
Dosen Tetap	5 tahun	Magister	Asisten Ahli	5	5	5	5	5	5	5	5	5	5	5	5	5	5	5	5	5	5	4	4	5	5	5	5	5	5	1	5	5	5	5	5	5	5	5	5	5	5	5	5	5	5	5	5	5	5
Dosen Tetap DPK PNS	21 tahun	Doktor	Lektor	5	5	4	4	5	5	4	4	4	4	4	4	4	4	5	4	4	4	4	4	4	4	4	5	4	4	4	4	4	4	5	4	4	4	4	4	4	4	4	4	4	4	4	4	5	4
Dosen Tetap	8 thn	Magister	Lektor	5	5	1	5	5	5	5	5	5	5	5	5	5	5	5	5	5	5	5	5	5	5	5	5	5	5	5	5	5	5	5	5	5	5	5	5	5	5	5	5	4	5	4	5	5	5
Dosen PNS DPK	20 tahun	Magister	Lektor	5	5	5	5	5	5	5	5	5	4	4	4	4	4	4	4	4	5	3	4	4	4	5	4	4	5	3	5	4	4	4	4	4	4	4	4	4	4	5	4	5	4	4	4	4	5
Dosen Tetap	28 tahun	Doktor	Guru Besar	5	4	5	5	4	4	3	4	3	3	4	2	3	4	4	4	3	3	3	4	3	3	3	3	3	2	3	2	4	4	4	2	4	4	3	2	4	4	4	4	4	4	4	4	4	4
Dosen Tetap	22 tahun	Magister	Lektor	5	5	5	5	5	5	4	4	4	4	5	4	4	4	4	4	4	4	4	4	4	4	4	4	4	4	3	4	4	5	4	4	4	4	4	4	4	4	4	4	4	4	4	4	4	4
Dosen Tetap	7 thn	Magister	Asisten Ahli	1	1	1	1	1	1	1	1	1	1	1	1	1	2	1	1	1	1	1	1	1	1	1	1	1	1	1	1	1	1	1	2	1	2	1	1	1	1	1	1	3	3	1	1	1	1
Dosen Tetap	30 th	Doktor	Lektor	5	5	5	5	5	5	5	5	5	4	5	4	4	4	4	5	5	5	4	4	4	4	4	4	4	5	5	5	5	5	5	5	4	4	4	5	4	5	5	5	5	5	5	5	5	5
Dosen Tetap	12 thn	Doktor	Lektor Kepala	5	4	4	4	5	5	4	5	4	4	4	4	4	4	4	4	4	4	4	4	4	4	4	4	4	4	4	4	4	5	4	3	4	4	4	4	4	4	5	4	5	4	5	5	4	4
Dosen Tetap	7	Magister	Asisten Ahli	4	4	5	4	5	4	5	4	4	5	4	4	4	5	4	4	5	4	4	4	4	4	4	4	4	5	4	5	4	5	5	4	4	5	4	4	4	5	4	4	4	5	5	5	4	5
Dosen Tetap	7 Tahun 6 Bulan	Magister	Asisten Ahli	5	5	5	5	5	5	3	4	5	5	4	4	4	4	4	4	5	4	5	3	5	5	4	4	5	5	5	5	5	4	4	4	5	4	5	4	4	5	4	4	4	5	5	5	5	5
Dosen Tetap	30 th	Doktor	Lektor Kepala	5	5	5	5	5	5	5	5	5	4	5	4	4	4	4	5	4	4	3	3	4	4	3	4	4	4	4	4	3	5	5	3	4	3	4	3	4	4	4	4	4	5	5	3	3	3
Dosen Tetap	20 tahun	Doktor	Lektor	4	4	4	5	5	5	4	5	4	3	5	3	3	5	4	5	3	5	3	3	5	4	3	4	3	5	2	3	5	4	5	4	4	4	5	4	4	4	5	4	5	4	5	4	4	4
Dosen Tetap	20 tahun	Doktor	Lektor	5	5	5	5	5	5	5	5	5	3	4	4	3	4	5	5	3	4	4	4	4	4	4	4	4	4	4	4	4	4	3	4	4	4	3	4	4	4	4	4	4	4	4	4	3	3
Dosen Tetap	4 tahun	Magister	Lektor	3	2	2	3	4	5	2	4	3	2	4	2	2	2	3	4	3	3	4	4	3	3	2	3	3	4	5	5	2	4	2	5	5	4	3	4	2	3	3	2	3	2	2	4	5	4
Dosen Tetap	12 tahun	Doktor	Lektor	4	2	5	5	5	5	4	4	4	3	4	4	4	4	5	5	3	4	3	3	4	4	4	3	3	5	5	4	5	5	4	4	5	5	3	5	4	5	5	3	5	5	4	5	4	4
Dosen Tetap	2,5 tahun	Magister	Asisten Ahli	1	4	4	1	1	1	1	1	1	2	1	1	1	1	1	1	1	1	1	1	5	1	1	1	1	1	1	4	4	1	4	1	4	1	4	1	1	3	1	1	4	4	4	1	1	1
Dosen Tetap	16 tahun	Magister	Lektor	4	4	3	3	2	4	4	4	4	4	4	3	2	3	3	4	3	3	4	4	2	3	4	3	2	4	2	4	4	4	4	2	4	2	4	2	3	4	4	4	4	4	3	3	4	3
Dosen Tetap	5 tahun	Magister	Lektor	4	4	5	3	3	3	3	4	3	3	4	4	3	3	3	4	4	4	3	3	3	3	4	4	4	4	4	5	4	3	4	4	5	4	3	4	4	4	3	4	4	4	4	3	4	4
Dosen Tetap	6 tahun	Magister	Lektor	4	5	5	4	4	4	4	4	4	5	4	4	4	4	4	4	4	4	4	4	3	4	4	4	4	4	2	4	5	5	4	5	4	4	4	4	4	4	4	4	5	4	5	4	4	4
Dosen Tetap	29	Doktor	Lektor	5	4	4	4	3	4	4	4	4	3	3	4	3	3	3	3	3	3	4	4	4	3	3	4	3	4	4	4	3	4	4	4	4	4	4	3	4	4	4	3	4	4	4	4	4	4
Dosen Tetap	13 tahun	Magister	Lektor	5	4	5	5	4	5	4	4	4	4	4	5	5	5	4	5	5	5	5	5	4	5	5	5	4	4	5	5	4	4	4	4	4	4	4	4	4	4	4	4	3	4	5	4	4	4
Dosen Tetap	5 Tahun	Magister	Asisten Ahli	5	5	4	3	4	4	4	4	5	4	5	3	5	4	4	3	3	3	5	5	5	5	5	5	5	2	5	5	4	4	5	4	5	4	5	4	4	4	4	4	5	5	5	4	5	5
Dosen Tetap	5 tahun	Magister	Asisten Ahli	5	5	5	5	5	5	5	5	5	4	5	5	5	5	5	5	5	5	5	5	5	5	5	5	5	2	2	2	2	3	4	4	3	3	3	3	3	3	5	5	5	5	5	5	3	3
Dosen Tetap	3 tahun	Doktor	Lektor	5	4	4	5	4	5	4	5	4	4	4	4	4	4	4	5	4	4	4	4	4	4	4	4	4	4	3	4	4	4	4	4	5	4	4	4	4	4	4	4	4	4	5	4	4	4
Dosen Tetap	12 tahun	Magister	Asisten Ahli	2	2	2	2	3	4	3	1	1	1	1	1	1	1	1	1	1	1	2	2	1	1	1	1	1	1	1	3	2	5	5	3	4	5	3	3	2	5	5	3	5	5	5	1	1	3
Dosen Tetap	30 thn	Magister	Lektor	4	3	3	4	3	4	4	3	3	3	3	3	3	3	3	4	3	4	4	3	3	4	3	4	4	3	3	3	4	3	3	3	3	3	4	3	3	4	3	3	4	4	3	3	4	4
Dosen Tetap	20 tahun	Magister	Lektor	3	3	3	4	3	3	4	4	3	3	3	3	3	3	4	3	3	4	3	3	3	3	3	4	3	4	5	4	4	5	4	3	4	3	3	3	3	3	3	3	3	3	3	3	3	3
Dosen Tetap	21 Tahun	Doktor	Lektor	4	5	4	4	4	4	4	4	4	5	4	4	4	4	4	4	4	4	4	4	4	3	3	4	4	4	4	4	4	4	4	5	4	4	4	4	4	4	4	4	4	4	4	4	4	4
Dosen Tetap	15 Tahun	Magister	Asisten Ahli	2	2	2	4	3	4	5	5	5	4	5	4	5	4	4	5	4	4	4	5	5	5	5	5	4	5	5	5	5	5	5	5	5	5	4	4	5	5	5	5	5	5	5	5	5	5
Dosen Tetap	8 tahun	Magister	Asisten Ahli	5	5	4	5	5	5	4	4	5	5	5	4	4	4	4	4	4	4	5	5	4	4	4	4	4	5	4	5	5	5	5	5	5	5	4	4	5	5	5	5	5	5	5	5	4	4
Dosen Tetap	4 tahun	Magister	Asisten Ahli	4	5	4	4	4	4	3	5	5	5	5	4	4	5	5	5	4	4	3	4	4	4	4	4	4	3	3	5	4	4	4	4	4	4	4	4	3	4	3	4	4	3	3	3	3	3
Dosen Tetap	20 THN	Doktor	Lektor	5	5	5	5	5	5	5	5	5	5	5	5	5	5	5	5	5	5	5	5	5	5	5	5	5	5	5	5	5	5	5	5	5	5	5	5	5	5	5	5	5	5	5	5	5	5
Dosen Tetap	29 Tahun	Magister	Lektor	5	5	4	4	4	4	4	4	4	3	4	4	4	4	4	4	4	4	3	3	4	3	4	4	4	4	4	4	4	4	4	4	4	4	4	4	4	4	4	4	4	4	4	4	4	4
Dosen Tetap	34 thn	Magister	Lektor Kepala	5	5	5	4	5	5	5	5	5	5	5	4	4	4	4	4	4	4	3	4	4	4	4	4	4	4	4	4	4	4	5	5	5	5	4	4	4	4	4	5	5	5	5	5	5	5
Dosen Tetap	24 tahun	Doktor	Lektor	5	5	5	5	5	5	5	5	5	5	5	5	5	5	5	5	5	5	5	4	5	5	5	5	5	4	4	5	5	5	5	5	5	5	5	5	5	5	5	5	5	5	5	5	5	4
hharsono@univpancasila.ac.id	7 tahun	Magister	Asisten Ahli	4	4	4	3	4	4	4	4	3	4	4	4	3	4	5	4	4	4	3	3	3	4	4	4	4	5	5	5	4	5	5	5	4	4	4	4	5	5	3	4	5	4	4	5	4	4
Dosen Tetap	30 th	Doktor	Lektor Kepala	5	5	5	4	4	4	5	5	5	5	5	4	4	4	4	4	4	4	5	5	5	4	5	4	4	5	3	4	4	5	4	4	4	4	5	4	4	4	4	4	3	3	4	4	4	4
Dosen Tetap	32	Magister	Lektor	5	5	5	5	5	5	5	5	5	5	5	5	5	5	5	5	5	5	5	5	5	5	5	2	5	4	1	5	5	5	5	5	5	5	5	5	5	5	5	5	5	5	5	5	5	5
Dosen Tetap	33 tahun	Doktor	Lektor	5	5	5	4	5	4	4	4	4	4	4	5	4	4	4	4	4	4	4	4	4	4	4	4	4	5	5	4	5	5	5	4	4	5	5	4	4	5	4	4	4	4	4	4	4	4
Dosen Tetap	8 tahu	Doktor	Lektor	5	5	5	4	4	4	5	5	5	5	4	4	4	4	4	4	4	4	4	4	5	4	4	5	5	5	5	5	5	5	4	4	5	5	5	4	4	4	5	5	5	5	5	4	4	4
Dosen Tetap	8 tahun	Magister	Asisten Ahli	3	2	3	1	1	1	1	1	1	1	1	1	1	1	1	1	1	1	1	1	1	1	1	1	1	1	1	1	1	1	1	1	1	1	1	1	1	1	1	1	1	1	1	1	1	1
Dosen Tetap	34tahun	Doktor	Lektor Kepala	5	5	5	5	5	5	5	5	5	5	5	5	5	5	5	5	5	5	4	4	5	5	5	5	5	5	5	5	5	4	5	5	5	5	5	5	5	5	5	5	5	5	5	5	5	5
Dosen Tetap	> 10 tahun	Doktor	Lektor	4	4	3	4	4	5	5	4	4	5	4	5	5	3	4	4	3	3	2	2	3	3	3	3	3	5	5	5	3	4	3	2	4	4	3	2	2	4	3	3	5	3	3	4	3	2
Dosen Tetap	31 tahun	Doktor	Lektor Kepala	5	5	5	5	4	5	4	5	4	4	4	4	4	5	4	4	4	4	4	3	4	3	4	4	4	3	4	4	3	5	4	5	5	4	4	3	5	4	4	4	4	3	3	4	3	3
Dosen Tetap	36 tahun	Magister	Lektor Kepala	5	4	4	5	4	4	5	5	5	4	4	4	3	4	4	4	4	4	4	4	4	4	4	5	4	4	4	4	4	4	4	4	4	4	4	4	4	4	4	4	4	4	4	4	4	4
Dosen Tetap	3 tahun	Magister	Asisten Ahli	5	5	4	4	4	5	5	4	4	4	4	4	4	5	4	5	4	4	5	4	4	4	5	4	5	5	4	4	4	4	4	4	5	5	4	4	5	5	4	4	4	5	5	4	5	4
Dosen Tetap	12	Magister	Lektor	4	3	3	5	5	5	3	3	3	4	3	3	3	3	3	3	3	3	3	3	4	4	4	3	3	5	5	4	4	3	3	3	3	3	4	3	3	3	3	3	2	2	2	3	2	2
Dosen Tetap	20 tahub	Magister	Lektor	4	4	4	5	5	5	3	5	4	4	5	5	5	5	3	4	3	4	4	4	4	3	4	5	4	3	5	3	4	3	4	4	5	4	4	3	5	4	4	4	4	5	5	4	4	4
Dosen Tetap	15 tahun	Magister	Lektor	3	2	2	3	4	4	3	3	3	4	4	4	2	2	2	3	2	2	2	2	3	2	2	2	3	1	4	3	2	4	3	4	4	3	3	2	2	4	3	3	2	3	2	3	3	3
Dosen Tetap	20 Thn	Doktor	Asisten Ahli	5	5	5	5	5	5	5	5	5	5	5	5	5	5	5	5	5	5	5	5	5	5	5	5	5	5	5	5	5	5	5	5	5	5	5	5	5	5	5	5	5	5	5	5	5	5
Dosen Tetap	22 tahun	Magister	Lektor	4	3	4	3	2	4	4	3	3	4	3	3	2	2	2	2	3	3	2	2	2	3	3	3	2	4	2	4	4	4	4	3	4	4	3	3	2	4	3	3	4	4	2	3	4	4
Dosen Tetap	5 tahun	Magister	Asisten Ahli	4	5	3	4	4	4	4	3	3	4	4	3	3	3	3	3	3	3	3	3	3	3	4	4	4	1	2	4	3	5	3	3	4	3	3	3	3	3	3	3	4	4	3	3	4	4
Dosen Tetap	12 tahun	Magister	Lektor	5	5	5	5	5	4	4	5	4	5	4	5	5	5	4	5	4	5	5	4	5	5	5	4	5	5	5	5	4	5	5	5	5	4	5	5	4	5	5	5	5	4	5	5	5	4
Dosen Tetap	7 tahun	Magister	Lektor	5	5	5	5	5	5	5	5	5	5	5	5	5	5	5	5	5	5	5	5	5	5	5	5	5	5	5	5	5	5	5	5	5	5	5	5	5	5	5	5	5	5	5	5	5	5
Dosen Tetap	15 tahub	Magister	Lektor	2	1	2	2	3	3	2	3	4	5	2	4	3	4	4	4	4	3	3	3	3	3	3	3	4	3	4	3	3	4	3	3	3	3	3	2	4	3	3	4	3	3	4	3	3	4
Dosen Tetap	40 thn	Doktor	Lektor	5	5	4	3	3	4	2	4	4	2	4	3	3	2	2	2	2	2	4	3	4	3	4	4	3	2	5	2	5	5	5	5	5	4	5	4	5	5	4	3	2	2	2	5	4	1
Dosen Tetap	30 tahun	Doktor	Lektor Kepala	4	5	4	4	4	4	5	3	3	4	3	4	3	2	3	3	4	3	5	4	3	3	4	3	3	4	5	3	2	3	3	4	4	4	3	3	3	3	3	2	4	3	3	3	3	3
Dosen Tetap	26 th	Doktor	Lektor Kepala	5	4	5	4	4	4	5	4	4	4	4	5	4	4	4	4	4	4	5	5	4	4	4	5	5	5	5	4	4	5	4	4	4	4	4	4	4	4	4	4	4	4	4	4	5	4
Dosen Tetap	7 tahun	Magister	Asisten Ahli	5	3	4	4	4	4	3	4	4	3	3	3	3	3	4	4	3	4	3	3	3	4	4	4	4	4	3	4	3	2	3	3	3	3	4	3	4	4	3	4	4	3	3	3	4	3
Dosen Tetap	7	Doktor	Lektor	4	3	4	5	5	4	3	4	4	4	4	4	3	4	4	3	3	4	4	4	4	4	3	4	3	3	4	4	3	5	4	3	4	4	4	3	4	4	3	3	4	4	3	4	3	3
Dosen Tetap	28	Doktor	Lektor	5	3	4	5	3	4	3	4	4	3	4	4	4	3	3	4	4	4	4	4	4	4	4	4	4	5	4	5	4	4	3	3	4	4	4	4	4	4	3	4	4	3	4	4	5	4
Dosen Tetap	8 tahun	Magister	Lektor	5	1	5	5	5	5	5	5	5	5	5	5	5	5	5	5	5	5	1	1	4	2	3	4	4	3	4	4	4	4	5	4	4	4	4	3	4	4	4	4	3	4	4	4	4	4
Dosen Tetap	30 th	Magister	Lektor	5	3	3	5	5	5	5	5	5	5	5	5	5	5	5	5	4	4	2	2	3	4	4	4	5	3	5	5	5	5	4	4	5	5	5	5	5	3	3	3	5	3	3	5	4	4
Dosen Tetap	4th	Magister	Asisten Ahli	4	4	4	4	4	4	4	4	4	4	4	3	4	4	4	3	3	4	2	2	4	4	4	4	4	4	4	4	4	4	4	4	4	4	4	4	3	4	3	4	4	4	4	2	3	4
Dosen Tetap	29 thn	Magister	Asisten Ahli	4	4	5	4	4	5	5	5	5	4	5	4	4	4	4	4	4	4	2	2	4	4	4	4	4	2	4	4	4	5	4	4	4	4	4	4	4	4	4	4	2	4	3	4	5	4
Dosen Tetap	5 tahun	Magister	Asisten Ahli	5	4	4	3	4	4	4	4	5	4	4	4	4	4	4	4	4	4	4	5	4	5	5	4	4	4	1	5	5	3	5	4	4	4	4	4	4	4	4	4	5	4	4	4	4	4
Dosen Tetap	13 tahun	Magister	Asisten Ahli	5	4	4	5	5	5	5	5	5	5	5	5	5	5	5	5	5	5	5	5	5	5	5	5	5	5	4	5	4	5	5	5	5	5	5	4	5	5	5	5	5	5	5	5	5	5
Dosen Tetap	Lebih dari 30 tahun	Magister	Asisten Ahli	4	3	3	4	4	5	3	4	5	5	5	3	3	5	3	3	3	3	3	3	2	5	5	5	5	3	5	3	2	3	3	3	5	3	3	3	5	5	5	5	5	5	5	3	3	3
Dosen Tetap	9 tahun	Magister	Asisten Ahli	4	4	4	4	4	4	4	4	4	4	4	4	4	4	4	3	3	3	3	3	3	3	3	3	3	3	3	4	4	4	4	4	4	4	4	4	4	4	4	4	4	4	4	4	4	4
Humas	7 tahun	Magister	Tenaga Pengajar	5	5	5	5	5	5	5	5	5	5	5	4	5	5	5	4	4	4	4	4	5	5	4	4	4	4	4	4	5	5	5	5	5	4	5	4	5	5	5	5	5	5	5	4	4	3
Dosen Tetap	8 tahun	Magister	Asisten Ahli	5	3	5	5	4	5	3	5	3	5	5	5	4	4	5	5	3	4	3	4	3	4	5	5	5	5	5	3	4	5	4	5	5	5	5	5	5	5	5	3	5	5	4	3	4	4
Dosen Tetap	18 tahun	Magister	Lektor	5	4	3	3	4	4	4	4	4	4	4	4	4	4	4	4	4	4	5	4	4	4	4	4	4	4	4	5	5	5	5	5	4	5	5	4	4	4	4	4	4	4	4	4	4	4
Dosen Tetap	5 tahun	Magister	Asisten Ahli	5	4	4	4	3	4	3	4	4	4	4	3	4	3	4	3	4	4	5	3	5	4	5	4	4	3	4	4	5	3	4	5	3	5	4	3	5	4	3	4	4	3	5	4	5	4
Dosen Tetap	17 Tahun	Magister	Lektor	5	5	4	3	4	4	3	5	4	5	4	4	4	3	4	3	5	4	4	3	4	4	3	5	4	3	5	4	5	4	5	3	5	4	5	4	4	3	5	4	5	4	5	4	3	4
Dosen Tetap	18 tahun	Magister	Lektor	3	4	4	5	5	4	4	3	5	4	4	3	4	3	4	4	4	3	5	3	4	4	3	5	4	5	4	5	4	3	5	4	4	3	5	4	3	4	4	3	5	4	4	3	4	5
Dosen Tetap	18 tahun	Magister	Lektor	5	4	5	4	4	5	4	5	4	5	3	4	4	5	4	4	3	5	4	4	5	4	3	5	4	3	5	4	5	4	5	4	3	5	4	4	5	4	5	3	5	4	3	5	3	5
Dosen Tetap	18 tahun	Magister	Lektor	4	5	5	4	5	4	3	4	3	5	4	4	3	3	5	4	4	5	5	4	5	4	5	4	3	5	5	4	5	4	5	4	4	4	5	3	5	3	4	4	4	3	5	3	4	4
Dosen Tetap	27tahun	Magister	Lektor	4	5	4	4	5	5	4	4	4	3	4	4	4	4	4	4	4	4	4	3	4	4	4	4	4	3	3	3	4	4	4	4	4	4	4	4	4	4	4	4	4	4	4	4	5	4
Dosen Tetap	1 tahun 7 bulan	Magister	Tenaga Pengajar	4	4	4	3	3	4	3	3	3	3	4	2	3	2	3	2	2	2	2	2	3	2	2	2	2	2	2	4	3	4	4	4	5	4	4	2	2	3	2	2	4	4	4	2	4	4
Dosen Tetap	16 Tahun	Magister	Lektor	4	3	4	5	4	3	4	4	5	4	3	5	5	3	4	5	3	4	4	3	3	5	5	3	4	5	4	3	3	4	3	4	4	3	4	3	4	3	5	5	4	3	3	4	5	5
Dosen Tetap	13	Doktor	Lektor Kepala	4	5	4	3	4	4	5	4	4	4	4	3	4	4	5	4	4	5	4	4	3	4	4	4	4	5	4	4	2	3	2	4	3	4	4	2	3	4	4	4	3	4	4	4	3	2
Dosen Tetap	18	Doktor	Lektor Kepala	4	4	3	4	5	4	4	3	4	4	5	5	4	4	4	5	4	4	4	5	4	5	5	4	4	5	4	4	4	5	4	4	4	5	4	3	3	2	2	3	2	4	4	2	2	4
Dosen Tetap	15	Magister	Lektor	4	4	3	4	5	4	4	4	5	4	5	4	4	5	4	4	4	4	5	4	4	5	4	4	5	4	4	4	3	2	3	4	2	3	4	4	2	3	4	4	3	2	4	4	3	2
Dosen Tetap	13 Tahun	Magister	Lektor	5	3	4	4	5	4	3	3	4	4	5	5	3	4	4	5	5	4	4	5	5	4	5	4	5	4	4	4	4	5	5	4	5	4	4	4	3	5	5	4	5	4	4	4	3	3
Dosen Tetap	7	Magister	Lektor	4	5	4	3	4	4	4	5	4	4	5	4	4	3	4	4	5	4	4	4	3	4	5	4	4	4	5	4	4	3	4	4	4	4	4	3	5	4	4	4	5	4	4	5	4	4
Dosen Tetap	7	Magister	Lektor	4	4	3	4	5	4	4	3	4	5	4	4	3	4	4	4	3	4	5	4	4	4	4	4	3	4	4	4	4	5	4	4	5	4	4	4	5	5	4	4	4	4	3	4	5	4
Dosen Tetap	12	Magister	Lektor	4	5	4	3	4	4	3	4	4	4	4	3	4	4	4	3	4	4	4	4	3	4	4	4	3	4	4	5	2	2	4	2	2	2	4	4	4	4	3	4	4	4	3	4	4	4
Dosen Tetap	14 Tahun	Magister	Lektor	4	5	3	5	3	4	4	3	5	3	4	4	5	4	4	5	3	3	4	5	4	5	3	3	4	5	4	4	5	4	4	3	5	3	5	3	4	5	3	5	4	3	5	4	5	3
Dosen Tetap	17 Tahun	Magister	Lektor	4	4	5	4	4	3	5	5	5	4	4	5	4	4	3	5	3	4	4	4	5	5	4	4	3	4	4	5	4	4	5	5	3	4	5	5	5	4	5	4	3	5	5	4	4	4
Dosen Tetap	15 Tahun	Magister	Lektor	5	3	4	4	3	5	4	4	3	4	5	4	5	3	4	4	5	4	4	4	4	3	5	3	3	4	5	5	3	4	4	4	4	5	4	3	3	5	5	4	3	4	5	3	3	5
Dosen Tetap	16 Tahun	Magister	Lektor	5	5	4	4	3	4	5	4	4	3	4	3	4	4	4	5	5	3	4	3	5	4	3	4	5	3	4	5	5	4	3	4	4	5	4	5	4	3	4	5	4	5	4	3	3	4
Dosen Tetap	15 Tahun	Magister	Lektor	5	4	4	3	5	4	3	4	3	5	5	4	4	3	3	4	5	4	4	3	5	4	3	4	5	4	5	3	3	4	5	3	4	5	3	5	5	4	4	3	5	3	4	5	3	4
Dosen Tetap	18 tahun	Magister	Lektor	5	4	3	5	5	4	4	3	4	3	4	5	4	4	3	5	3	4	3	3	4	4	4	4	5	3	4	5	4	5	4	5	4	5	4	4	3	4	4	5	5	4	5	4	5	5
Dosen Tetap	17 Tahun	Magister	Lektor	4	4	4	5	5	5	4	3	4	5	4	3	4	4	5	3	4	3	5	4	4	3	5	3	4	4	3	5	5	4	4	3	3	4	4	4	5	3	4	4	5	5	4	4	3	5
Dosen Tetap	15 tahun	Magister	Lektor	4	5	4	5	5	4	5	4	5	4	5	5	4	4	5	5	4	4	5	4	5	4	5	4	5	4	4	5	4	5	4	3	4	5	5	5	4	4	5	4	4	5	4	4	3	4
Dosen Tetap	13	Magister	Lektor Kepala	4	5	4	4	4	5	4	5	4	4	5	4	4	5	4	5	4	4	4	4	5	4	4	5	4	4	5	4	4	5	4	4	5	4	4	4	4	5	4	4	4	3	4	4	4	5
Dosen Tetap	10 tahun	Magister	Tenaga Pengajar	4	4	4	5	5	5	4	4	4	4	4	4	4	4	4	4	4	4	4	4	4	4	4	4	4	4	4	4	3	5	3	3	4	3	4	3	3	3	4	4	5	5	5	3	4	4
Dosen Tetap	7	Magister	Tenaga Pengajar	4	4	5	4	4	4	4	5	4	3	4	4	4	5	4	4	4	4	4	4	3	4	4	4	4	4	4	4	3	4	3	2	3	4	4	3	4	3	4	3	4	3	3	3	4	4
Dosen Tetap	14 tahun	Doktor	Lektor	5	3	5	4	4	5	4	5	3	3	5	4	3	4	4	3	3	3	4	4	4	3	4	4	4	3	3	4	3	5	5	5	5	5	4	3	5	5	5	4	5	5	4	4	4	4
Dosen Tetap	20	Doktor	Lektor Kepala	4	5	4	4	4	5	4	3	4	4	5	4	4	4	5	4	3	4	4	5	4	3	4	4	4	5	4	4	4	3	4	4	3	4	4	4	4	4	5	3	4	4	5	4	5	4
Dosen Tetap	8	Doktor	Lektor Kepala	4	5	4	4	3	4	4	5	4	5	4	4	4	4	5	4	4	3	4	5	4	4	5	4	4	5	4	5	4	4	5	4	4	5	4	3	5	4	4	5	4	3	4	4	5	4
Dosen Tetap	6	Magister	Lektor	4	5	4	3	4	4	4	5	4	4	4	5	4	5	4	4	4	4	4	5	4	5	4	5	4	3	4	4	5	4	4	5	4	5	4	3	4	4	3	2	2	4	2	4	3	4
Dosen Tetap	10	Magister	Lektor	4	3	4	4	3	4	4	3	4	4	3	4	5	5	4	5	4	4	5	4	3	4	5	5	4	4	4	5	5	4	4	5	5	4	5	4	4	4	5	4	4	5	5	5	4	5
Dosen Tetap	10	Magister	Lektor	4	3	4	4	5	4	4	5	4	4	4	5	4	4	5	4	5	4	4	3	4	4	4	3	4	4	2	4	3	4	2	2	4	4	4	3	4	3	4	2	2	4	3	2	2	2
Dosen Tetap	18	Magister	Lektor Kepala	4	5	4	4	4	4	5	4	4	4	3	4	5	4	5	4	4	4	5	4	4	5	4	4	5	4	4	5	5	4	4	5	5	4	4	4	5	4	4	5	4	5	4	4	5	4
Dosen Tetap	7	Magister	Lektor Kepala	4	5	4	4	3	4	5	4	4	5	5	4	4	5	4	4	4	4	4	5	3	4	5	4	5	5	4	5	5	4	4	5	5	4	4	4	4	2	5	4	5	4	4	2	3	4
Dosen Tetap	15	Doktor	Lektor	4	3	4	3	4	4	5	5	4	4	5	4	4	4	5	5	4	4	4	5	5	4	5	4	4	3	4	4	4	2	3	2	3	4	4	4	5	4	4	3	3	4	4	2	4	4
Dosen Tetap	15	Doktor	Lektor Kepala	5	5	5	5	5	5	5	5	5	4	4	5	4	4	4	3	4	4	4	4	4	4	3	4	4	4	5	4	3	4	4	4	4	4	4	4	4	4	4	5	4	4	5	4	4	5
Dosen Tetap	13	Doktor	Lektor Kepala	5	5	5	4	4	4	4	4	5	4	4	4	5	5	4	4	5	4	4	4	4	5	5	4	5	4	4	4	4	4	3	4	4	4	5	4	4	4	4	4	4	4	4	4	4	3
Dosen Tetap	14	Doktor	Lektor Kepala	4	4	5	4	4	4	4	4	4	4	4	4	4	4	5	5	5	4	4	4	4	4	4	5	4	4	3	4	4	5	4	4	4	4	5	4	4	4	4	4	4	4	3	4	4	4
Dosen Tetap	15	Doktor	Lektor Kepala	5	4	4	4	4	4	4	4	4	5	4	4	4	4	4	4	4	5	5	5	5	4	4	4	4	4	4	4	5	4	4	4	4	4	4	4	5	4	4	4	4	4	4	5	4	4
Dosen Tetap	Lima tahun	Magister	Asisten Ahli	4	4	4	4	4	4	5	4	4	3	3	3	3	4	4	4	4	3	4	4	3	3	3	3	3	4	4	4	4	4	4	4	5	4	4	5	4	5	5	5	5	4	4	4	4	4
Dosen Tetap	12	Magister	Lektor	4	4	4	4	5	4	4	4	4	5	5	5	4	4	4	4	4	4	4	4	4	4	4	4	4	4	5	4	4	5	5	4	4	4	4	4	4	4	5	4	4	4	5	4	3	3
Dosen Tetap	10 tahun	Magister	Lektor	5	4	4	4	5	4	4	4	4	4	4	4	5	4	4	4	4	4	4	4	5	4	4	4	4	3	3	3	4	3	4	5	5	4	5	4	3	4	4	4	4	4	4	4	4	4
Dosen Tetap	12 tahun	Magister	Lektor	4	4	4	5	5	5	4	4	4	5	4	4	4	4	4	5	5	5	4	4	4	5	4	4	4	3	3	4	5	4	4	5	4	4	4	4	4	4	4	4	4	4	4	4	4	4
Dosen Tetap	13 tahun	Magister	Lektor	5	4	4	4	4	5	4	4	5	5	5	5	4	4	4	4	4	4	4	4	4	5	4	4	4	3	3	4	4	5	5	5	5	5	4	5	5	4	4	4	3	4	4	4	4	3
Dosen Tetap	14 tahun	Magister	Lektor	5	4	4	4	4	4	4	4	4	5	5	5	4	4	4	4	4	4	5	5	4	4	4	4	5	5	4	3	4	4	4	4	4	4	4	4	4	4	4	5	5	5	5	4	4	4
Dosen Tetap	16 tahun	Magister	Lektor	4	4	4	3	4	4	5	5	4	4	4	4	4	4	4	4	4	5	4	4	5	4	4	4	4	4	4	3	4	4	4	4	4	3	4	4	5	4	4	4	4	4	3	4	4	4
Dosen Tetap	13 tahun	Magister	Lektor	4	4	4	4	4	5	4	4	4	5	5	4	4	4	5	4	4	4	4	3	4	4	4	5	4	3	4	3	4	4	3	4	5	5	4	4	4	4	4	4	3	4	4	4	4	4
Dosen Tetap	14 tahun	Magister	Lektor	5	5	4	4	4	4	5	4	4	4	4	4	4	4	4	4	4	4	4	4	5	5	4	4	4	3	4	3	4	4	4	4	5	4	4	4	4	4	4	4	4	4	4	4	3	4
Dosen Tetap	15 tahun	Magister	Lektor	4	4	4	4	5	4	4	4	4	4	4	4	4	4	5	4	4	4	4	4	3	4	4	4	4	3	3	3	4	4	4	4	5	5	4	4	3	4	4	4	4	3	4	4	4	3
Dosen Tetap	12	Magister	Lektor Kepala	4	4	3	5	4	4	4	4	5	4	4	4	5	5	4	4	5	5	4	4	4	3	4	4	5	3	4	4	4	5	3	4	4	4	4	4	4	5	4	5	3	4	4	4	4	4
Dosen Tetap	15	Magister	Lektor Kepala	4	4	4	5	5	5	5	5	5	5	5	4	4	4	5	5	4	4	4	4	4	4	4	5	4	3	3	4	4	5	5	5	4	4	4	5	4	5	5	5	4	4	4	4	4	4
Dosen Tetap	11 th	Magister	Lektor	4	2	3	4	4	4	3	4	3	3	3	3	2	2	2	2	2	2	3	4	3	3	3	3	3	4	4	4	3	4	4	4	5	4	4	1	5	5	5	5	5	4	4	3	3	4
Dosen Tetap	5 th	Magister	Asisten Ahli	4	3	3	4	3	4	3	4	4	5	4	4	4	3	4	4	4	4	3	3	4	3	4	4	4	3	3	3	4	4	4	4	5	4	4	3	4	4	4	4	4	4	4	4	4	4
Dosen Tetap	3 tahun	Magister	Asisten Ahli	4	5	4	5	4	5	3	3	3	3	4	3	3	4	4	3	3	3	3	3	2	3	4	3	3	3	4	3	2	3	3	3	4	4	3	3	3	3	4	3	2	2	2	4	4	3
Dosen Tetap	10 tahun	Magister	Lektor	4	4	4	4	4	4	4	4	4	3	4	3	3	3	3	3	4	3	4	4	4	3	4	5	5	5	5	5	3	4	3	4	4	4	4	3	4	4	4	4	3	3	4	3	4	4
Dosen Tetap	9 tahun	Magister	Asisten Ahli	5	5	5	4	5	4	4	4	4	5	4	5	5	4	5	5	4	4	4	5	4	4	4	5	4	4	4	4	4	5	5	4	4	4	4	4	4	5	4	4	4	4	4	4	4	4
Calon dosen tetap	2 bulan	Magister	Lektor	5	5	5	5	4	5	3	4	4	5	5	5	4	5	4	5	5	5	5	4	5	5	5	4	5	5	5	5	5	5	5	5	5	5	5	4	4	4	3	4	3	4	3	5	5	5
Dosen Tetap	10 thn 7 bulan	Magister	Lektor	5	5	4	5	4	4	5	5	5	4	4	4	4	3	3	3	4	4	5	5	5	4	4	4	4	2	1	2	4	4	5	4	5	4	4	3	4	4	3	4	5	5	4	2	2	2
Dosen Tetap	10 tahun	Doktor	Lektor	4	3	3	4	4	4	3	4	4	3	4	3	3	3	3	3	3	3	5	4	3	3	3	3	3	5	4	4	3	4	4	3	4	3	4	3	3	4	3	3	4	4	4	4	4	4
Dosen Tetap	10	Magister	Asisten Ahli	4	4	3	3	4	4	3	3	3	2	2	2	2	2	2	2	2	2	4	4	3	3	3	3	3	2	4	3	4	3	4	3	3	2	4	2	2	2	3	3	4	4	4	2	2	3
Dosen Tetap	2 tahun	Doktor	Lektor	5	5	4	4	5	5	5	5	5	4	4	4	4	5	4	4	4	4	4	4	5	3	3	5	5	5	5	5	4	3	3	3	4	4	5	3	4	4	5	5	5	5	5	5	4	4
Dosen Tetap	10	Magister	Lektor	4	4	3	3	4	4	4	4	4	4	4	4	4	4	4	3	3	3	4	4	4	4	4	4	4	5	3	5	4	4	4	4	4	4	4	4	4	4	4	4	4	4	4	3	3	4
Dosen Tetap	13 Tahun	Magister	Lektor	5	5	5	5	5	5	5	5	4	5	5	5	4	4	4	5	4	4	5	5	5	5	5	5	5	5	3	5	4	5	4	5	5	5	5	5	5	5	5	5	5	5	5	2	3	3
Dosen Tetap	2 Tahun 3 Bulan	Doktor	Lektor	5	5	5	5	5	5	5	5	5	5	5	5	5	5	5	5	5	5	5	5	5	5	5	5	5	5	3	5	5	5	5	5	5	5	5	5	5	5	4	5	5	5	5	5	5	5
Dosen Tetap	4,5 tahun	Doktor	Lektor	4	4	5	5	3	4	4	3	3	2	3	3	3	3	3	3	2	2	3	3	4	4	4	4	4	2	3	3	2	3	3	4	3	4	3	3	3	3	3	3	3	3	3	3	3	3
Dosen Tetap	6	Doktor	Tenaga pengajar	3	4	4	3	3	4	3	3	4	2	4	2	2	3	3	3	2	2	4	4	4	3	3	3	3	3	3	4	3	2	5	5	4	3	3	3	3	3	2	2	2	2	3	3	3	3
Dosen Tetap	15 tahun	Magister	Lektor	5	4	4	4	4	4	4	5	5	5	5	4	4	4	4	4	4	4	4	4	4	5	5	4	4	3	3	4	4	4	4	4	4	4	4	5	3	4	4	4	3	4	4	4	4	4
Dosen Tetap	11 tahun	Magister	Lektor	5	5	3	5	5	5	5	5	5	5	5	5	5	5	5	5	5	5	4	4	4	4	4	4	4	4	3	5	5	5	5	5	4	5	5	5	5	5	5	5	5	5	5	5	5	5
Dosen Tetap	33 tahun	Doktor	Lektor Kepala	5	4	4	5	5	4	4	5	5	5	3	4	4	3	3	4	5	4	4	5	4	3	4	3	4	3	4	5	5	4	4	5	4	3	4	3	5	3	4	3	4	3	4	4	5	3
Dosen Tetap	24 Tahun	Doktor	Lektor	5	4	4	4	4	5	4	4	4	3	4	4	4	4	4	3	3	4	4	4	4	4	4	4	4	2	2	2	4	4	4	4	5	4	4	4	4	4	4	4	4	4	4	4	4	4
Dosen Tetap	17 Tahun	Magister	Lektor	4	5	3	5	3	4	4	5	4	4	5	4	5	4	4	3	5	5	3	4	5	4	3	3	4	4	5	5	4	3	3	5	5	4	4	5	4	4	3	4	5	3	5	4	4	5
Dosen Tetap	10	Magister	Asisten Ahli	4	3	3	4	4	4	3	3	4	4	3	4	4	4	3	3	3	3	3	3	3	4	3	3	4	2	2	3	4	4	4	3	3	3	3	4	3	3	4	4	5	4	3	2	2	2
Dosen Tetap	8	Magister	Asisten Ahli	5	5	5	5	5	5	5	5	4	4	4	4	4	4	4	4	4	4	4	4	4	4	4	4	4	4	3	4	4	5	5	4	4	4	4	4	4	4	4	4	4	4	4	4	4	4
Dosen Tetap	10 tahun	Magister	Lektor	5	4	3	3	3	4	4	4	5	2	3	4	4	4	3	4	3	3	4	3	4	3	4	3	4	4	2	4	4	4	4	4	2	2	4	2	2	2	2	3	2	3	1	4	3	2
Dosen Tetap	34 tahun	Doktor	Guru Besar	5	5	5	5	5	5	5	5	5	5	5	5	5	5	5	5	5	5	5	5	5	5	5	5	5	5	5	5	4	5	5	5	5	5	5	5	5	5	5	5	5	5	5	5	5	5
Dosen Tetap	14 tahun	Magister	Lektor	3	5	5	3	3	5	5	4	4	5	5	3	3	5	3	3	3	3	1	1	5	3	1	1	4	4	5	4	3	1	3	4	4	4	4	4	5	3	3	4	5	3	4	4	4	4
Dosen Tetap	6	Magister	Lektor	5	2	3	5	4	4	4	4	4	3	4	4	4	4	4	3	3	3	4	4	4	4	4	4	4	3	4	4	4	4	4	3	5	4	4	4	4	4	4	4	4	4	3	3	4	4
Dosen Tetap	6	Magister	Lektor	3	1	1	2	2	2	2	2	2	3	3	3	1	1	1	1	1	1	4	3	2	1	1	2	1	5	5	1	1	2	1	2	3	1	2	1	2	3	2	2	2	2	2	2	3	3
Dosen Tetap	14 Tahun	Doktor	Lektor	5	2	2	5	5	5	4	3	5	5	5	4	5	4	4	4	5	4	4	4	4	4	4	4	5	2	2	5	2	5	5	5	5	4	5	5	5	5	5	5	5	5	5	4	4	3
Dosen Tetap	8 tahun	Magister	Lektor	4	4	4	2	2	4	4	4	2	2	4	2	2	4	2	4	2	2	4	2	4	4	2	3	2	2	2	3	2	4	2	2	4	2	4	2	2	4	3	2	4	3	2	2	2	3
Dosen Tetap	10 Tahun	Doktor	Lektor	5	5	5	4	5	5	5	5	5	5	4	4	4	4	4	4	4	4	4	4	4	4	3	4	4	3	3	3	4	3	4	4	5	5	4	4	5	4	4	4	4	4	4	4	4	4
Dosen Tetap	10 Tahun	Doktor	Lektor	4	3	4	4	4	4	4	4	4	5	4	4	4	4	4	4	4	4	4	5	4	4	4	4	3	3	3	4	4	4	4	5	5	5	4	4	4	4	4	3	3	4	4	4	4	3
Dosen Tetap	11 Tahun	Doktor	Lektor	5	4	3	3	4	4	3	4	4	5	3	4	4	5	3	5	4	3	3	5	4	3	4	4	3	5	4	4	3	4	4	3	5	4	4	4	4	3	5	3	5	4	4	5	3	5
Dosen Tetap	20 TAHUN	Magister	Lektor Kepala	4	4	4	5	4	5	4	4	4	4	4	4	3	3	4	4	4	4	3	4	4	4	4	4	4	4	5	5	3	5	4	3	4	4	4	3	3	4	4	3	5	4	3	4	3	3
Dosen Tetap	6 tahun	Magister	Asisten Ahli	4	3	3	3	4	3	4	3	3	3	3	3	3	3	4	4	3	3	3	3	3	3	3	3	3	4	3	4	3	4	4	3	3	3	3	3	3	3	4	3	4	3	4	3	3	3
Dosen Tetap	8 Tahun	Magister	Asisten Ahli	5	4	5	5	5	5	5	4	4	5	5	4	5	4	4	4	4	4	5	4	4	4	4	5	4	4	4	3	5	4	4	4	3	5	4	4	4	4	3	4	4	3	3	4	4	4
Dosen Tetap	5 thn	Magister	Asisten Ahli	5	5	5	5	5	5	4	5	5	4	5	4	5	5	5	4	4	4	3	3	5	3	4	3	4	4	4	4	4	4	4	4	4	4	4	4	4	4	4	4	4	4	4	4	4	4
Dosen Tetap	14 Tahun	Magister	Asisten Ahli	5	5	5	4	4	4	5	5	5	4	4	4	5	4	4	4	4	4	5	5	5	4	4	4	4	3	4	4	4	5	5	4	4	4	4	4	4	4	4	4	4	4	3	4	3	3
Dosen Tetap	5 tahun	Magister	Lektor	5	4	4	5	5	4	4	3	4	4	4	4	4	4	4	5	4	4	3	3	4	4	3	4	4	5	5	5	5	4	4	4	4	4	5	4	3	4	4	4	3	3	3	3	3	3
Dosen Tetap	12 Tahun	Magister	Lektor	5	5	5	5	5	5	4	4	4	4	4	4	5	4	4	4	5	4	4	4	5	4	4	3	4	3	3	4	4	4	5	5	5	5	4	4	4	4	4	4	4	4	4	4	4	3
Dosen Tidak Tetap	8 tahun	Magister	Asisten Ahli	3	3	3	4	4	4	4	4	4	4	4	4	4	4	4	4	4	4	4	4	4	4	4	4	4	4	4	4	4	4	4	4	4	4	4	4	4	4	4	4	4	4	4	4	4	4
Dosen Tetap	5 Tahun	Magister	Asisten Ahli	4	4	4	4	4	4	4	4	4	4	4	3	3	3	3	3	3	3	3	3	4	3	3	3	4	4	4	4	3	3	3	4	4	4	4	4	4	4	4	3	4	4	4	3	3	3
Dosen Tetap	6 Tahun	Doktor	Tenaga Pengajar	4	5	4	5	4	4	3	4	4	5	3	4	3	5	4	3	4	5	4	3	4	4	3	5	4	4	5	4	5	4	3	4	3	4	4	5	4	4	3	4	5	3	4	4	5	3
Dosen Tetap	11 Tahun	Magister	Asisten Ahli	4	3	4	3	4	3	4	3	4	5	3	4	3	3	4	4	3	5	5	3	5	3	5	3	5	3	5	4	5	4	4	3	5	4	3	3	5	4	4	3	5	3	5	3	4	4
Dosen Tetap	7 Tahun	Magister	Asisten Ahli	5	4	4	3	4	4	5	4	3	5	4	5	4	4	3	4	4	3	5	4	4	4	3	4	4	3	4	4	5	4	3	4	3	4	4	3	4	4	3	4	4	3	4	3	4	3
Dosen Tetap	10 tahun	Magister	Asisten Ahli	5	4	4	5	3	4	3	3	4	4	5	4	3	4	4	3	4	3	5	4	3	4	3	4	5	4	3	4	5	4	3	3	4	5	5	3	5	4	4	3	5	4	4	3	5	4
Dosen Tetap	18 tahun	Magister	Asisten Ahli	4	5	4	4	4	3	4	4	4	4	5	3	4	4	4	4	3	4	5	4	4	4	5	4	3	4	4	3	5	4	4	3	4	3	5	4	5	4	4	5	4	4	4	5	4	3
Dosen Tetap	15 Tahun	Magister	Lektor	5	4	4	3	3	4	4	3	3	4	4	3	4	3	4	5	4	3	5	3	4	4	3	4	4	3	5	4	5	4	3	4	4	3	4	3	5	4	4	3	5	4	3	5	4	3
Dosen Tetap	14 tahun	Magister	Tenaga Pengajar	4	4	5	3	4	4	3	4	4	4	5	4	3	3	5	4	3	3	4	5	4	4	3	5	3	4	3	5	5	4	3	4	4	3	4	5	4	3	3	4	3	5	4	3	5	4
Dosen Tetap	3 Tahun	Magister	Tenaga Pengajar	4	4	3	4	5	3	4	5	3	5	4	3	4	3	4	3	4	3	4	5	3	4	4	4	3	5	4	4	5	4	4	5	3	4	4	4	4	4	4	3	3	4	5	3	3	5
Dosen Tetap	7 Tahun	Magister	Tenaga Pengajar	5	4	3	3	4	4	3	5	4	5	4	4	3	4	4	5	3	4	4	5	4	3	4	3	4	3	4	4	3	4	5	4	4	3	5	3	5	4	3	4	3	5	4	3	4	5
Dosen Tetap	17 Tahun	Magister	Lektor	3	3	3	3	3	3	3	3	3	3	3	3	3	3	3	3	3	3	4	3	3	3	3	3	3	3	4	3	3	3	3	3	3	3	3	3	4	3	3	4	3	3	3	4	4	4
Dosen Tetap	20 Tahun	Magister	Lektor Kepala	5	3	4	5	5	4	3	3	4	5	4	4	5	5	5	5	5	4	3	3	5	4	4	3	3	3	5	5	3	3	3	5	3	3	4	3	5	3	4	3	3	5	3	3	4	4
Dosen Tetap	6 thn	Doktor	Lektor	5	5	5	4	5	5	4	5	5	5	5	4	4	5	5	4	4	5	3	4	4	4	5	4	5	3	3	4	5	3	5	5	5	5	4	4	5	5	4	4	4	4	4	4	4	4
Dosen Tetap	3	Magister	Asisten Ahli	5	5	5	3	3	3	3	4	4	3	3	4	3	3	3	3	3	3	4	4	4	3	3	3	3	2	2	4	3	4	3	4	4	4	4	2	2	4	4	4	4	3	3	3	4	3
Dosen Tetap	1 tahun	Doktor	Lektor Kepala	5	5	5	5	5	5	5	5	5	4	5	5	5	5	5	5	5	5	5	5	5	5	5	5	5	5	5	5	5	5	5	5	5	5	5	5	5	5	5	5	5	5	5	5	5	5
Dosen Tetap	3 tahun	Magister	Asisten Ahli	4	4	4	3	3	4	4	4	5	4	4	4	5	5	5	4	3	4	5	5	5	4	4	4	3	3	5	4	3	3	3	3	3	3	5	3	3	5	3	3	5	5	5	3	5	5
Dosen Tetap	5 tahun	Magister	Lektor	5	5	5	5	5	5	5	5	5	5	5	5	5	5	5	5	5	5	5	5	5	5	5	5	5	5	5	5	5	5	5	5	5	5	5	5	5	5	5	5	5	5	4	5	5	5
Dosen Tetap	5	Magister	Asisten Ahli	4	4	4	2	2	2	3	4	2	4	4	4	4	4	2	2	3	2	3	2	2	3	2	3	3	1	1	1	4	4	4	4	2	4	4	4	4	4	4	4	4	4	4	4	4	4
Dosen Tetap	3 tahun	Magister	Asisten Ahli	5	5	5	5	4	4	4	5	4	5	5	5	4	4	4	5	5	5	5	5	5	5	4	5	4	4	3	4	4	5	5	5	5	5	5	5	4	5	4	4	5	5	5	5	5	4
Dosen Tidak Tetap	10	Magister	Asisten Ahli	5	5	5	5	5	5	5	5	5	5	5	5	5	5	5	5	5	5	5	5	5	5	5	5	5	5	5	5	5	5	5	5	5	5	5	5	5	5	5	5	5	5	5	5	5	5
Dosen Tetap	3 tahun	Magister	Asisten Ahli	5	5	5	5	5	5	5	4	4	4	5	4	4	4	4	4	4	4	5	5	5	5	5	5	5	5	5	5	5	5	5	5	5	4	5	5	5	5	5	5	5	5	5	5	5	5
Dosen Tetap	11 tahun	Magister	Lektor	5	5	5	5	4	5	5	4	5	5	5	4	5	5	5	5	5	5	4	4	4	4	4	4	5	3	4	4	3	4	4	4	5	4	4	4	5	4	4	4	4	4	4	4	4	4
Dosen Tetap	15 tahun	Magister	Lektor	5	4	5	5	5	5	5	4	5	5	5	5	5	4	5	5	5	5	5	5	5	4	5	5	5	5	5	4	5	5	4	5	5	5	5	5	5	4	5	5	5	5	5	4	5	5
Dosen Tetap	14 tahun	Magister	Lektor	5	5	5	5	5	4	5	5	5	5	5	5	4	4	4	4	4	4	3	4	5	5	5	5	5	3	4	4	3	4	4	4	4	4	4	5	5	4	4	4	4	4	4	4	3	3
Dosen Tetap	5	Magister	Asisten Ahli	5	5	4	4	5	4	4	4	5	5	4	4	4	4	5	4	4	4	4	5	4	5	4	4	5	4	5	4	4	5	4	5	4	5	3	4	4	4	4	4	4	4	4	4	4	4
Dosen Tetap	2 tahun	Magister	Asisten Ahli	5	4	4	5	5	5	5	5	5	4	5	4	4	5	5	5	4	5	5	5	5	5	5	5	5	5	3	2	4	5	5	5	5	5	5	5	5	5	5	5	5	5	5	5	5	5
Dosen Tetap	20 th	Doktor	Lektor Kepala	5	2	2	4	4	5	4	4	4	4	4	4	4	4	4	4	4	4	4	4	4	4	4	4	4	4	4	4	5	5	5	5	4	5	5	4	4	5	5	4	5	5	4	5	5	5
Dosen Tetap	11 tahun	Magister	Lektor	4	3	3	2	2	2	4	4	4	2	2	2	3	2	3	2	2	2	2	3	2	2	2	2	2	3	2	2	2	2	2	2	2	2	2	2	3	2	2	2	2	2	2	3	2	2
Dosen Tetap	25 tahun	Doktor	Lektor	5	5	4	3	3	4	5	5	5	2	4	3	3	3	4	5	3	3	5	4	4	4	5	5	3	3	3	3	3	5	3	3	5	5	4	4	4	5	4	4	3	3	3	3	4	2
Dosen Tetap	13 tahun	Magister	Lektor	5	5	4	4	5	5	5	5	5	5	5	5	4	4	4	4	4	4	4	4	4	4	4	4	4	3	4	4	4	4	4	5	5	5	4	4	5	5	4	5	4	4	4	4	4	4
Dosen Tetap	14 tahun	Magister	Lektor	5	4	4	4	5	5	5	4	4	5	5	5	4	4	4	5	4	4	4	4	4	4	4	4	4	3	3	3	4	5	5	5	5	5	5	5	4	4	4	4	4	4	4	4	4	4
Dosen Tetap	12 tahun	Magister	Lektor	5	5	5	5	5	5	5	5	5	5	5	4	4	4	5	4	4	4	4	4	5	5	5	5	5	4	4	4	3	4	4	4	4	4	3	2	4	4	4	4	3	4	4	4	3	4
Dosen Tetap	2 tahun	Magister	Asisten Ahli	5	4	4	5	5	5	5	4	4	4	5	5	5	5	5	4	4	4	5	5	5	5	5	5	5	5	5	5	5	5	5	4	4	4	5	5	5	5	5	5	5	5	5	4	4	5
Dosen Tetap	13 tahun	Doktor	Lektor Kepala	5	5	5	5	5	5	5	5	5	4	4	4	5	4	4	4	4	4	4	4	5	5	5	4	4	3	3	3	3	4	4	4	5	4	4	4	4	4	4	5	3	4	4	4	4	3
Dosen Tetap	15 tahun	Magister	Lektor	5	4	5	5	5	4	5	4	5	5	5	4	5	5	5	5	5	5	5	4	4	4	5	5	5	5	5	5	5	5	4	5	5	5	5	5	4	5	5	4	5	5	5	4	4	5
Dosen Tetap	13 tahun	Magister	Lektor	5	5	5	4	5	5	4	5	5	5	5	5	4	4	5	5	5	5	5	5	5	4	4	5	5	5	5	5	5	4	5	5	5	5	5	5	5	5	4	5	5	5	5	5	4	5
Dosen Tetap	6	Doktor	Asisten Ahli	4	4	4	3	3	3	4	4	4	4	3	3	3	3	4	3	3	4	3	3	4	3	3	3	3	4	5	4	4	3	3	4	4	3	3	4	4	4	4	4	4	3	4	4	4	4
Dosen Tetap	17 tahun	Magister	Lektor	5	5	5	4	5	5	5	5	5	5	5	5	4	5	5	4	5	5	5	4	5	5	5	5	5	5	4	5	5	5	5	5	4	4	5	5	5	5	5	4	5	4	5	5	4	5
Dosen Tetap	8 tahun	Doktor	Lektor	5	5	4	5	5	4	4	4	4	4	4	5	4	4	4	4	4	4	5	4	4	4	3	3	4	5	4	5	3	3	4	4	4	4	4	4	4	4	4	3	3	4	3	4	4	4
Dosen Tetap	19 Tahun	Doktor	Lektor	4	5	5	5	4	4	4	5	5	4	4	4	4	4	4	4	4	5	3	3	4	5	4	4	4	3	4	4	3	4	4	4	5	4	3	3	4	4	4	4	4	4	4	4	4	3
Dosen Tetap	9 Tahun	Magister	Asisten Ahli	5	5	5	5	5	4	4	4	4	5	4	4	5	4	4	4	4	4	3	3	4	4	4	4	5	4	4	5	5	5	4	4	5	4	3	4	4	4	4	4	3	4	4	4	4	4
Dosen Tetap	18 Tahun	Magister	Lektor	5	5	5	5	4	4	4	4	4	5	4	4	4	4	4	4	4	5	5	4	4	4	4	4	4	3	3	3	3	4	4	4	5	4	4	4	5	4	4	4	4	4	4	4	3	4
Dosen Tetap	18 tahun	Magister	Lektor Kepala	5	4	5	5	5	5	5	4	5	5	5	5	5	5	5	4	4	5	5	4	5	5	5	5	5	4	5	5	5	5	5	4	5	5	5	5	4	5	5	5	4	5	5	4	5	5
Dosen Tetap	15 tahun	Doktor	Lektor Kepala	3	4	4	3	3	5	4	4	4	3	4	3	3	3	3	3	3	3	4	3	4	4	4	4	4	5	4	4	4	3	5	4	5	3	4	3	5	4	4	3	4	4	4	4	5	4
Dosen Tetap	32 Tahun	Magister	Lektor	4	4	3	4	3	4	3	4	4	3	3	4	3	4	3	3	3	3	3	3	4	3	3	3	3	4	4	3	4	5	5	4	4	4	3	3	4	4	3	4	4	4	5	4	4	4
Dosen Tetap	37 tahun	Doktor	Lektor	5	5	5	5	4	5	5	5	5	4	5	5	5	5	5	5	4	4	5	5	5	5	5	5	5	4	5	4	5	4	4	4	5	5	5	4	5	5	5	5	5	4	5	5	5	4
Dosen Tetap	18 Tahun	Doktor	Lektor	5	5	4	5	5	5	5	5	5	5	4	4	4	3	4	4	4	4	4	4	5	4	4	3	3	3	3	4	4	5	4	4	5	5	4	4	5	4	3	3	3	3	3	4	4	4
Dosen Tetap	18 Tahun	Magister	Asisten Ahli	4	4	5	4	4	4	4	4	4	4	4	4	4	4	4	5	4	4	5	5	5	4	4	4	4	3	3	3	4	4	4	4	4	4	5	3	4	4	4	4	3	4	4	4	4	4
Dosen Tetap	15 Tahun	Magister	Lektor	5	5	5	5	4	4	5	4	4	5	5	5	4	4	4	4	4	4	5	5	4	4	4	4	4	3	4	4	4	4	4	4	4	4	4	4	4	5	5	5	4	4	4	4	4	4
Dosen Tetap	18 Tahun	Magister	Lektor	5	5	5	5	4	4	5	4	4	5	4	4	5	4	4	4	4	4	3	3	4	4	4	5	5	5	5	4	5	4	4	4	5	4	3	4	4	4	4	4	3	3	4	3	4	4
Dosen Tetap	18 Tahun	Magister	Lektor	4	4	4	4	4	5	5	4	4	5	5	5	5	4	4	4	4	4	5	5	4	4	3	3	4	4	4	4	4	4	4	4	5	4	5	4	4	4	4	5	4	4	4	4	4	4
Dosen Tetap	10 Tahun	Magister	Lektor	5	4	4	4	5	5	4	4	4	5	5	5	5	5	4	4	4	4	4	4	4	4	3	4	4	3	3	4	5	5	5	4	4	4	4	4	5	4	3	4	3	4	4	4	4	4
Dosen Tetap	15 Tahun	Magister	Lektor	5	4	4	4	4	4	5	5	5	4	4	4	5	5	5	5	5	5	4	4	4	5	4	4	4	3	3	3	4	5	5	4	5	4	4	4	4	4	4	4	4	4	4	4	4	4
Dosen Tetap	18 Tahun	Magister	Lektor	4	4	5	5	4	4	4	5	5	4	4	4	5	5	5	4	4	4	5	5	5	5	4	4	4	3	3	4	4	4	4	4	5	4	4	4	4	4	4	4	3	4	4	4	4	4
Dosen Tetap	19 Tahun	Magister	Lektor	5	5	5	5	5	5	5	4	4	4	4	4	5	5	5	4	4	4	3	3	4	4	4	4	4	3	4	4	4	4	4	4	4	4	4	4	4	4	4	4	3	4	4	4	4	4
Dosen Tetap	18 Tahun	Magister	Lektor	5	4	4	4	4	4	4	4	5	5	5	5	5	4	5	5	5	5	4	4	4	4	4	5	4	3	3	3	3	5	4	4	4	4	5	5	5	5	4	4	4	4	4	4	4	4
Dosen Tetap	17 tahun	Magister	Lektor	5	5	4	5	4	5	5	4	5	5	5	5	5	5	4	5	5	4	5	5	5	5	5	4	5	5	5	5	5	5	4	5	4	4	5	5	5	5	5	4	4	4	4	4	5	5
Dosen Tetap	10	Magister	Tenaga Pengajar	1	5	5	1	1	1	1	1	2	1	1	1	1	1	1	1	1	1	1	1	1	1	1	1	1	1	1	1	1	1	1	1	1	1	1	1	1	1	1	1	1	1	1	1	1	1
Dosen Tetap	5 th	Magister	Asisten Ahli	5	4	3	5	5	5	4	4	4	4	5	4	4	4	4	4	4	4	4	4	4	4	4	4	4	4	4	4	4	4	4	4	4	4	4	4	4	4	4	4	4	4	4	5	4	4
Dosen Tetap	3 Tahun	Magister	Asisten Ahli	4	3	4	4	4	4	4	4	4	3	4	4	4	4	4	4	3	4	4	4	4	3	4	4	4	4	4	4	4	3	3	4	4	3	4	3	4	3	4	3	4	4	4	4	3	4
Dosen Tetap	6 tahun	Magister	Lektor	5	4	5	5	5	5	5	5	4	5	5	5	4	5	5	5	5	5	5	4	5	5	5	5	5	5	3	4	5	5	5	5	5	5	5	5	4	5	5	4	5	5	5	5	5	5
Dosen Tetap	10	Magister	Lektor Kepala	4	5	4	5	4	4	5	4	5	5	4	5	4	5	5	4	5	4	4	5	5	4	3	4	4	4	5	4	4	5	4	4	5	4	4	4	4	3	4	5	4	3	4	4	5	5
Dosen Tetap	20 tahun	Magister	Asisten Ahli	4	4	4	3	4	4	5	5	4	3	4	4	4	3	4	4	3	4	3	3	5	4	4	4	4	4	5	5	3	4	5	3	4	4	4	3	3	4	4	4	5	4	4	4	4	4
Dosen Tetap	6 tahun	Magister	Lektor	4	4	3	3	5	3	5	3	4	3	4	3	3	3	4	3	3	3	3	3	4	3	3	3	3	2	5	4	3	3	3	3	4	3	4	2	3	4	3	4	3	3	2	3	4	4
Dosen Tetap	5 tahun	Magister	Asisten Ahli	5	5	5	4	5	4	5	5	5	5	5	5	4	5	5	5	5	5	5	5	5	5	5	4	4	4	5	5	5	4	5	4	4	5	4	4	5	4	5	5	5	5	5	4	5	5
Dosen Tetap	6 Tahun	Magister	Asisten Ahli	5	5	4	4	4	4	5	5	5	4	4	4	4	4	4	4	4	4	5	4	4	4	3	3	4	4	4	4	3	4	4	5	5	4	3	3	4	4	4	4	4	4	4	4	4	4
Dosen Tetap	14 tahun	Magister	Asisten Ahli	4	4	4	4	4	4	4	4	4	4	4	4	4	4	4	4	4	4	4	4	4	4	4	4	4	3	3	4	4	4	4	4	4	4	4	4	4	4	4	4	4	4	4	3	4	4
Dosen Tetap	5 tahun	Magister	Asisten Ahli	5	4	5	5	5	5	5	4	5	5	5	5	4	5	5	5	5	4	5	5	5	4	5	5	5	5	4	5	5	4	5	5	5	5	5	5	5	5	4	4	4	5	5	5	5	5
Dosen Tetap	17 Tahun	Magister	Lektor	5	5	4	5	5	4	4	4	4	4	4	4	4	4	4	4	4	4	3	4	4	4	5	5	5	4	4	4	4	5	4	4	5	4	4	4	4	4	4	4	4	4	4	4	4	3
Dosen Tetap	6 tahun	Magister	Lektor	4	3	3	2	2	3	4	2	2	3	4	3	2	2	2	2	1	2	2	2	3	3	4	2	3	2	4	4	1	1	2	2	4	3	2	3	3	3	1	1	1	1	1	2	4	3
Dosen Tetap	19 tahun	Magister	Lektor Kepala	4	4	5	5	4	4	5	5	5	4	4	4	4	4	5	5	5	5	4	4	5	4	3	4	4	3	3	3	3	4	4	4	5	5	4	4	4	4	4	4	4	4	4	4	4	4
Dosen Tetap	11	Magister	Lektor	5	1	1	5	5	5	5	5	5	5	5	5	5	5	5	5	5	5	5	5	5	2	5	5	5	5	2	5	4	5	5	5	5	5	5	5	5	5	1	5	5	5	5	5	5	2
Dosen Tetap	15 tahun	Magister	Lektor	5	5	5	5	5	5	5	4	5	5	5	4	4	4	4	5	4	4	4	4	5	5	5	5	4	3	4	3	4	4	4	4	5	5	4	4	5	3	4	4	3	4	4	4	4	4
Dosen Tetap	10 tahun	Magister	Lektor	5	5	5	4	5	5	5	5	5	5	5	5	5	5	5	4	4	4	5	5	5	5	5	5	5	4	5	5	4	4	5	5	5	5	5	5	5	5	4	4	4	4	4	5	4	4
Dosen Tetap	4 tahun	Magister	Asisten Ahli	5	4	3	4	3	3	3	4	4	3	3	3	3	3	3	3	3	3	3	4	4	4	4	3	4	3	4	3	3	4	4	4	5	4	4	3	4	4	3	3	4	3	3	3	4	4
Dosen Tetap	20 tahun	Doktor	Lektor Kepala	5	5	5	5	5	5	5	5	4	4	5	4	4	4	4	4	4	4	4	5	5	5	5	5	5	5	5	5	3	4	3	4	5	4	4	4	4	4	3	3	3	4	4	3	4	3
Dosen Tetap	15 tahun	Magister	Lektor	4	4	4	3	3	4	4	3	3	4	4	4	3	4	4	4	3	3	4	3	3	3	4	3	3	3	3	4	4	3	4	3	4	4	3	4	3	4	4	3	4	3	4	4	4	3
Dosen Tetap	25 tahun	Doktor	Lektor Kepala	4	4	5	4	4	4	4	4	5	5	5	5	5	4	4	5	4	4	4	4	4	5	5	5	5	4	4	5	4	5	4	4	5	4	4	4	4	5	5	5	4	4	4	4	4	4
Dosen Tetap	12 Tahun	Doktor	Lektor	5	4	4	5	4	5	5	5	4	4	4	4	4	4	4	4	4	4	5	5	4	5	4	5	5	2	3	4	4	4	4	4	5	4	5	4	4	5	4	4	3	4	3	4	4	4
Dosen Tetap	2	Magister	Asisten Ahli	2	2	2	1	1	1	1	1	2	1	1	1	1	1	1	1	1	1	1	1	1	1	1	1	1	4	3	1	1	3	1	1	3	1	3	1	1	1	1	1	4	3	3	1	3	3
Dosen Tetap	37 tahun	Doktor	Guru Besar	5	4	3	5	5	5	5	5	5	4	5	5	5	5	5	5	5	5	4	4	5	4	5	5	5	4	4	4	4	5	5	5	5	5	5	4	5	5	4	4	4	4	5	4	4	4
Dosen Tidak Tetap	5	Magister	Asisten Ahli	4	4	3	3	3	4	4	4	4	3	3	3	3	3	3	3	3	3	3	3	4	4	3	4	4	3	3	3	3	3	3	3	3	3	3	3	3	3	3	3	3	3	3	3	3	3
Dosen Tetap	5 Tahun	Magister	Asisten Ahli	4	4	4	4	4	4	5	5	5	3	4	4	4	4	5	4	4	4	5	4	5	4	5	4	4	5	3	5	5	5	5	4	5	4	4	3	4	4	4	4	4	4	4	4	5	4
Dosen Tetap	5 tahun	Magister	Asisten Ahli	5	3	3	5	5	5	5	5	5	5	5	5	5	5	5	5	5	5	5	5	5	5	5	5	5	5	5	5	4	4	4	5	5	5	5	4	4	4	4	4	4	4	4	5	5	5
Dosen Homebase	11 tahun	Magister	Lektor	5	5	5	5	5	5	5	5	5	5	5	5	5	5	5	5	5	5	4	4	5	4	4	4	4	4	4	4	5	5	5	5	5	5	5	4	5	5	4	5	5	5	5	5	5	5
Dosen Tetap	11 tahun	Magister	Lektor	5	5	5	5	5	5	5	5	5	5	4	4	4	4	4	4	4	4	4	5	4	4	4	5	5	4	4	5	4	4	5	5	5	5	4	4	4	4	4	4	4	4	4	4	4	4
Dosen Tetap	12 tahun	Magister	Lektor	5	5	5	5	5	5	4	5	4	5	5	4	4	4	5	4	4	4	3	4	4	4	5	5	5	4	4	4	4	5	5	5	5	5	4	4	3	4	4	4	3	4	4	4	4	3
Dosen Tetap	9 thn	Magister	Lektor	4	5	5	4	4	4	4	4	4	5	5	4	5	4	5	4	4	4	3	3	4	4	5	4	4	4	5	4	5	5	4	5	5	4	4	4	4	5	4	4	4	4	5	5	5	5
Dosen Tetap	11 tahun	Magister	Lektor Kepala	5	4	4	3	3	4	4	3	3	4	1	3	3	3	4	4	4	4	4	4	4	4	3	3	3	3	3	3	3	4	3	4	3	4	3	3	4	4	3	3	3	3	3	4	4	4
Dosen Tetap	12 tahun	Magister	Tenaga Pengajar	5	3	3	1	2	3	3	3	4	2	3	3	2	2	2	2	3	3	1	1	3	1	3	3	3	1	3	3	3	4	4	2	5	3	3	4	3	5	4	3	3	5	4	1	4	3
Dosen Tidak Tetap	5	Magister	Lektor	4	4	4	4	4	4	4	4	4	4	4	4	4	4	4	4	4	4	4	4	4	4	4	4	4	4	4	4	4	4	4	4	4	4	4	4	4	4	4	4	4	4	4	4	4	4
Dosen Tidak Tetap	2 tahun	Magister	Asisten Ahli	2	2	4	4	3	3	2	2	2	2	2	2	2	2	2	2	2	2	2	2	3	2	2	3	2	2	3	4	2	4	2	4	4	4	2	2	2	2	2	4	3	3	3	2	3	3
Dosen Tetap	Sepuluh tahun lebih	Magister	Asisten Ahli	5	4	4	4	4	5	5	5	5	3	4	4	4	4	5	5	4	4	4	4	5	5	5	5	5	5	5	5	4	5	5	5	5	5	5	5	5	5	5	5	5	5	5	5	5	5
Dosen Tetap	19 Tahun	Magister	Lektor	5	5	3	4	4	5	3	4	4	4	5	5	4	4	3	5	4	3	5	4	3	4	3	5	4	3	3	4	4	3	5	3	4	4	4	3	4	3	4	3	5	3	4	4	3	5
Dosen Tetap	18	Magister	Asisten Ahli	4	4	3	4	5	4	3	4	4	4	5	4	4	4	4	4	3	4	4	4	5	4	4	5	4	4	4	5	4	5	4	4	3	4	4	4	5	4	4	4	4	5	4	4	5	4
Dosen Tetap	20	Magister	Asisten Ahli	4	4	5	4	4	4	5	4	4	4	4	5	4	4	5	4	5	4	4	4	5	4	5	4	4	5	4	4	5	4	4	4	4	5	5	4	2	3	4	2	2	2	4	4	4	2
Dosen Tetap	4 tahun	Magister	Tenaga Pengajar	4	2	2	3	2	2	3	3	2	2	2	2	2	2	2	2	2	2	2	2	4	2	2	2	3	2	3	2	2	2	2	2	3	2	2	2	2	2	3	2	4	4	3	2	2	2
Dosen Tetap	6	Magister	Asisten Ahli	4	4	5	4	4	3	4	5	4	4	5	4	4	5	4	4	5	3	4	5	4	4	4	5	5	4	4	5	4	5	4	4	5	4	4	4	5	4	4	4	5	4	4	5	4	4
Dosen Tetap	9	Magister	Tenaga Pengajar	4	4	3	2	4	4	4	5	4	4	2	4	4	4	5	4	4	4	4	5	4	4	4	4	4	5	4	4	4	4	5	4	4	3	4	4	5	4	4	4	4	5	4	4	4	5
Dosen Tetap	3 tahun	Doktor	Lektor	5	2	2	4	5	5	5	5	5	4	5	4	5	4	5	5	5	5	4	5	4	5	4	5	5	4	4	5	5	5	4	5	5	5	5	4	5	5	5	5	5	5	5	5	5	5
Dosen Tetap	2 tahun	Magister	Asisten Ahli	5	5	5	4	4	4	4	5	4	4	4	3	4	3	3	4	2	3	4	3	2	3	3	3	4	2	1	3	4	5	2	5	5	3	5	2	3	4	4	4	4	4	4	4	5	4
Dosen Tetap	12	Magister	Tenaga Pengajar	4	4	5	4	4	5	4	5	4	4	3	4	5	4	4	5	4	4	4	3	4	5	4	4	5	4	4	4	2	2	3	4	2	4	4	2	4	2	2	3	4	4	2	3	4	4
Dosen Tetap	4 Tahun	Doktor	Lektor	5	4	4	4	4	4	5	5	5	5	4	4	4	4	4	4	4	4	5	4	4	4	4	4	4	3	3	3	4	4	4	4	4	4	5	3	4	4	4	4	4	4	3	4	4	4
Dosen Tetap	3 Tahun	Doktor	Tenaga Pengajar	4	4	5	5	5	4	4	4	4	4	5	5	4	4	4	5	5	4	4	5	4	4	4	4	4	4	4	4	5	5	5	5	5	4	4	4	4	4	5	4	5	4	4	4	4	4
Dosen Tetap	10 Tahun	Magister	Asisten Ahli	5	5	5	5	4	4	4	4	4	5	5	5	5	4	4	4	4	4	5	5	4	4	4	4	4	3	4	4	4	4	4	5	5	4	4	4	4	4	4	5	3	3	4	4	4	4
Dosen Tetap	2 Tahun	Magister	Tenaga pengajar	5	5	5	4	4	5	4	4	5	4	4	4	4	4	4	4	5	4	3	4	4	4	4	4	4	3	4	3	4	3	4	4	5	4	5	4	5	4	3	3	3	4	4	4	4	3
Dosen Tetap	2 Tahun	Magister	Tenaga Pengajar	5	5	5	5	5	4	4	5	4	5	4	4	4	4	5	4	4	5	4	4	4	4	5	4	4	3	3	3	5	4	4	4	4	4	5	4	4	4	4	4	3	3	3	3	4	4
Dosen Tetap	2 Tahun	Magister	Tenaga pengajar	5	5	5	5	5	5	4	4	4	5	4	5	5	5	5	4	4	4	3	4	4	4	4	4	4	3	4	4	4	4	4	4	5	4	4	4	5	5	3	4	3	4	4	4	4	4
Dosen Tetap	2 Tahun	Magister	Tenaga Pengajar	5	5	5	5	4	4	4	4	4	4	4	5	4	4	4	4	4	4	5	5	5	4	4	4	4	3	3	3	5	5	4	4	4	4	5	4	5	4	4	4	4	4	4	3	4	4
Dosen Tetap	2 Tahun	Magister	Tenaga Pengajar	5	5	5	4	4	4	4	4	5	5	4	4	4	4	4	5	5	5	4	4	5	5	5	4	4	3	3	3	4	4	4	4	4	4	4	4	4	5	4	4	3	4	4	4	4	4
Dosen Tetap	3 tahun	Magister	Tenaga Pengajar	5	5	4	4	5	5	5	5	4	5	5	5	4	5	5	5	5	5	4	4	5	5	5	4	4	5	5	5	5	5	4	5	5	4	5	5	5	4	5	5	4	5	5	5	5	5
Dosen Tetap	15 Tahun	Magister	Tenaga Pengajar	5	4	4	4	4	4	5	4	4	5	4	4	4	4	4	4	5	4	5	4	4	4	4	4	4	3	3	3	4	5	5	4	4	4	4	4	4	4	4	4	4	4	4	3	3	4
Dosen Tetap	5 Tahun	Magister	Lektor	5	3	3	5	4	4	3	5	3	4	4	5	3	3	3	4	4	4	3	3	3	3	3	3	3	2	2	2	3	5	4	4	5	4	3	3	5	4	3	3	3	3	3	3	3	3
Dosen Tetap	18 tahun	Doktor	Lektor	5	5	5	4	4	4	5	5	5	5	5	5	5	4	5	5	5	4	5	5	5	5	5	4	4	4	5	5	5	5	5	4	5	5	5	5	4	4	4	5	5	5	5	5	5	4
Dosen Tetap	11 Tahun	Doktor	Tenaga Pengajar	5	5	4	5	5	5	5	5	4	5	3	4	4	4	4	4	4	4	4	4	4	4	4	4	5	3	4	4	4	4	4	4	4	4	5	5	5	4	4	4	4	4	4	4	4	4
Dosen Tetap	11 Tahun	Magister	Asisten Ahli	5	5	5	4	4	4	4	4	4	5	5	4	4	4	4	4	4	4	3	3	4	4	4	4	4	3	3	3	5	4	4	4	4	4	4	4	4	4	4	4	4	3	3	3	3	3
Dosen Tetap	18 Tahun	Magister	Asisten Ahli	4	5	5	5	5	5	4	5	5	4	4	5	5	4	5	4	5	5	3	4	4	4	4	4	5	3	4	4	4	5	4	5	5	5	4	4	4	4	4	4	4	4	4	3	4	4
Dosen Tetap	7 Tahun	Magister	Lektor	5	5	4	4	5	5	4	5	5	4	4	4	4	4	4	4	4	4	5	5	4	4	4	4	4	3	3	3	5	5	4	4	4	4	5	5	5	4	4	4	4	4	4	4	4	4
Dosen Tetap	16 tahun	Magister	lektor	5	4	5	5	5	5	5	4	5	5	5	5	4	4	5	5	5	5	5	4	4	5	5	5	5	5	4	5	5	5	5	5	5	4	4	4	5	5	5	5	5	5	5	5	5	4
Dosen Tetap	18 Tahun	Magister	Lektor	5	5	5	4	4	4	4	4	4	4	4	4	4	4	4	5	4	4	4	4	4	3	3	4	4	4	3	3	4	5	4	4	4	4	5	3	4	4	4	4	4	4	4	4	3	3
Dosen Tetap	11 tahun	Magister	Lektor Kepala	5	4	5	5	4	5	5	5	5	4	4	5	5	5	4	5	4	5	4	5	5	5	4	5	5	5	4	5	5	4	5	5	5	5	5	5	5	5	4	5	5	4	5	5	5	4
Dosen Tetap	4 Tahun	Magister	Tenaga Pengajar	4	4	4	4	5	5	5	4	4	4	4	4	5	5	5	4	4	4	4	4	4	4	3	3	4	5	4	4	5	4	4	4	4	4	4	4	5	5	4	4	4	4	4	3	4	4
Dosen Tetap	4 Tahun	Magister	Tenaga Pengajar	5	5	5	5	5	5	5	5	5	4	4	4	5	4	4	4	4	4	3	4	4	4	3	4	4	3	3	3	4	5	5	5	5	4	4	4	5	4	4	4	4	4	4	4	4	3
Dosen Tetap	5 Tahun	Magister	Tenaga Pengajar	5	5	5	5	5	5	5	4	4	4	4	4	4	4	4	5	4	4	4	4	4	4	4	4	4	4	4	3	5	4	4	4	3	4	4	4	4	4	4	4	5	4	4	3	3	3
Dosen Tetap	5 tahun	Doktor	Lektor	4	3	3	3	3	4	4	4	4	3	4	3	4	4	4	4	4	4	4	4	4	4	4	3	4	5	4	4	4	3	3	3	4	4	3	4	3	4	3	3	3	3	3	3	3	3
Dosen Tetap	16	Doktor	Lektor	5	5	5	4	5	4	5	5	5	5	5	5	5	5	5	5	5	5	4	4	4	4	4	4	4	4	4	4	5	5	5	5	5	5	4	3	4	3	4	4	4	4	4	4	4	4
Dosen Tetap	12 tahun	Doktor	Lektor	5	4	5	4	4	5	5	5	5	4	5	3	4	4	4	4	5	4	4	4	5	5	5	4	5	4	4	5	4	5	5	4	4	5	5	5	5	5	5	4	4	4	4	5	4	5
Dosen Tetap	3 Tahun	Doktor	Asisten Ahli	5	4	4	5	4	3	4	4	5	3	4	3	5	4	4	4	5	4	3	5	4	5	4	4	3	5	4	3	4	4	3	5	4	3	4	5	3	4	3	4	5	4	5	3	5	4
Dosen Tetap	9 th	Magister	Asisten Ahli	4	5	4	3	4	5	5	4	5	4	5	4	3	5	4	5	4	5	4	5	3	4	5	4	5	3	5	4	4	5	3	5	4	5	4	5	5	4	3	5	5	5	4	4	3	5
Dosen Tetap	10 Tahun	Magister	Asisten Ahli	4	5	5	4	4	4	5	5	5	5	5	4	5	5	4	5	5	4	5	4	4	5	4	4	4	5	5	5	5	5	5	4	5	5	5	5	4	5	5	5	5	4	4	4	4	4
Dosen Tetap	7 Tahun	Magister	Asisten Ahli	5	5	4	5	5	4	5	5	4	5	4	4	4	5	4	5	4	5	4	5	4	5	5	4	5	4	5	5	5	4	4	5	5	5	5	4	5	5	4	4	5	5	5	4	5	5
Dosen Tetap	8 Tahun	Magister	Asisten Ahli	5	5	4	5	5	4	5	5	4	5	4	5	5	4	5	5	5	4	4	5	5	4	5	5	4	5	5	4	4	5	5	4	5	5	5	4	5	5	4	5	5	5	5	4	5	5
Dosen Tetap	4 Tahun	Magister	Asisten Ahli	4	5	5	4	4	5	5	4	4	5	5	4	5	4	5	5	5	4	4	5	5	4	5	4	5	5	4	5	4	4	5	4	4	5	5	5	5	4	4	5	5	5	5	5	4	5
Dosen Tetap	4 Tahun	Magister	Asisten Ahli	4	5	5	4	4	5	5	5	4	4	5	5	4	5	5	4	5	4	4	5	5	4	4	5	5	5	4	5	5	4	5	4	5	5	4	5	5	4	5	5	4	5	4	5	4	5
Dosen Tetap	17 Tahun	Magister	Lektor	4	5	4	5	5	4	5	5	4	5	4	4	5	5	4	5	5	4	5	4	4	5	4	4	5	4	4	4	4	4	5	4	4	5	5	4	5	5	4	5	5	4	4	5	5	5
Dosen Tetap	9 Tahun	Magister	Tenaga Pengajar	4	4	5	5	4	5	5	5	4	4	4	5	4	4	5	5	5	4	4	5	4	5	4	5	5	4	5	5	4	5	5	4	5	4	4	5	5	4	5	5	5	4	5	5	4	5
Dosen Tetap	5 Tahun	Magister	Tenaga Pengajar	4	4	4	5	5	5	5	5	5	4	5	4	5	5	4	5	5	4	5	4	4	5	5	4	5	5	4	5	5	4	5	5	5	4	5	4	4	5	5	5	4	5	4	5	5	5
Dosen Tetap	5 Tahun	Magister	Tenaga Pengajar	5	5	4	4	5	5	5	5	4	4	5	5	4	5	4	5	5	4	4	5	5	4	5	5	4	5	4	5	5	5	5	4	5	5	4	5	5	5	5	4	5	5	5	5	4	5
Dosen Tetap	4 tahun	Magister	Asisten Ahli	5	3	5	5	5	5	5	5	5	5	5	5	5	4	4	4	4	5	5	5	3	4	3	3	3	5	5	5	3	5	5	4	5	4	5	3	5	5	4	5	4	4	4	4	4	5
Dosen Tetap	3 thn	Doktor	Lektor	2	2	2	2	2	2	2	2	2	2	2	2	3	3	2	2	3	3	3	2	2	2	3	2	3	3	3	3	2	2	2	3	3	3	2	2	2	2	3	2	2	2	3	3	3	2
Dosen Tetap	7 tahun	Magister	Lektor	4	4	4	4	3	3	4	4	3	2	3	2	2	4	3	2	2	2	4	2	2	2	3	3	4	2	3	4	2	5	3	2	2	2	3	2	4	3	4	2	4	2	3	2	4	4
Dosen Tetap	20	Doktor	Lektor Kepala	4	4	3	4	4	5	4	4	4	4	4	5	4	4	5	4	4	3	5	4	4	4	4	5	4	4	4	4	4	4	5	4	4	4	4	3	5	4	4	5	4	4	4	5	4	5
Dosen Tetap	8 tahun	Magister	Asisten Ahli	4	3	3	3	4	4	4	4	3	4	3	3	3	4	3	3	3	3	5	5	4	3	4	3	3	3	5	4	3	4	3	3	5	3	4	2	4	4	4	3	5	4	4	3	5	4
Dosen Tetap	13	Doktor	Asisten Ahli	4	3	3	5	4	5	4	4	4	4	4	3	3	3	3	3	3	3	5	5	5	3	3	3	3	5	5	4	3	4	4	4	4	4	4	3	4	4	4	4	3	3	3	4	4	4
Dosen Tetap	20 th	Doktor	Lektor	4	4	4	4	3	4	4	4	4	3	4	3	3	3	3	3	3	3	4	4	4	3	4	4	4	3	4	4	3	4	3	4	4	4	3	3	3	3	3	3	3	4	4	4	3	3
Dosen Tetap	11 tahun	Magister	Lektor	3	2	2	4	3	5	1	5	3	4	3	2	2	2	1	1	1	1	5	4	3	2	1	2	1	2	1	4	1	4	1	3	5	2	2	1	1	3	2	1	3	2	2	3	3	3
Dosen Tetap	5	Magister	Asisten Ahli	4	5	4	4	4	4	4	4	4	4	4	4	5	4	3	4	4	4	4	3	4	5	4	4	4	4	5	4	4	4	4	4	4	5	4	2	2	2	4	2	2	2	4	2	4	2
Dosen Tetap	4	Magister	Tenaga Pengajar	4	5	4	4	3	4	5	4	4	4	5	4	4	4	4	4	5	4	4	4	5	4	4	4	4	4	3	4	4	5	4	4	4	4	4	4	4	5	4	2	2	2	4	5	4	4
Dosen Tetap	18	Magister	Lektor	4	4	5	4	4	4	4	4	5	4	4	4	4	3	4	5	4	4	4	4	5	4	4	4	4	5	4	4	4	4	5	4	4	4	4	4	5	4	4	5	4	4	5	4	4	4
Dosen Tetap	2 thn	Magister	Tenaga Pengajar	4	4	4	4	4	5	4	5	4	5	5	5	4	4	4	5	4	4	4	4	5	4	4	4	4	3	2	3	3	5	4	4	5	5	4	3	4	5	5	4	4	3	3	5	5	5
Dosen Tidak Tetap	10 Tahun	Magister	Tenaga Pengajar	5	5	5	5	5	5	4	5	4	3	5	2	3	3	4	4	3	3	4	4	5	4	4	4	4	4	4	5	4	5	5	5	5	5	5	5	5	5	4	4	4	4	5	3	4	4
Dosen Tetap	30th	Doktor	Lektor	5	3	3	5	5	5	3	4	4	5	5	4	4	4	4	4	4	4	3	3	4	4	4	4	4	3	4	4	4	5	4	5	5	4	5	5	5	5	4	4	5	5	5	4	4	3
Dosen Tetap	36 th	Doktor	Lektor Kepala	5	4	5	4	4	3	3	4	3	4	4	4	4	4	4	3	3	3	3	3	3	4	4	4	4	4	3	4	4	4	4	4	4	4	4	4	4	4	4	4	4	4	4	4	4	4
Dosen Tetap	9th	Magister	Asisten Ahli	3	4	3	2	2	2	2	2	3	2	3	2	3	2	2	2	2	2	3	2	2	2	2	2	2	2	2	3	2	4	2	3	4	3	3	2	2	2	3	3	2	3	2	2	2	2
Dosen Tetap	5 tahun	Magister	Asisten Ahli	3	2	3	3	2	4	2	2	3	4	4	2	3	4	3	3	3	3	2	4	4	4	2	3	3	2	3	3	3	2	3	2	3	3	4	4	3	4	2	2	2	2	2	3	3	3
Dosen Tetap	7-8 tahun	Magister	Asisten Ahli	4	4	4	4	4	5	5	5	5	3	4	3	2	2	3	3	1	3	4	3	4	4	5	5	5	2	2	3	4	4	4	5	5	4	3	3	3	3	2	3	4	4	4	2	3	3
Dosen Tetap	2 thn	Magister	Asisten Ahli	3	3	2	1	2	2	2	2	2	1	3	1	1	2	2	2	2	1	1	1	3	3	2	2	2	1	3	1	2	1	1	1	3	1	3	1	3	1	1	1	1	1	1	1	1	1
Dosen Tidak Tetap	6 bulan	Magister	Tenaga Pengajar	5	3	3	3	4	4	4	4	4	4	4	4	4	4	4	4	4	4	5	4	4	4	4	4	4	5	4	4	4	5	5	4	5	5	4	4	4	4	3	4	4	4	5	5	5	4
Dosen Tetap	2 tahun	Magister	Asisten Ahli	5	5	3	5	5	5	5	5	5	3	5	3	3	5	4	3	4	4	3	3	4	3	4	4	4	4	4	4	4	4	4	4	4	3	4	4	4	4	4	4	4	4	4	4	4	4
Dosen Tetap	10	Magister	Lektor	4	3	5	4	4	4	5	4	5	5	4	4	5	4	3	5	4	4	5	4	4	5	4	4	4	4	5	4	4	3	4	5	4	4	5	4	4	4	4	5	4	4	3	4	5	4
Dosen Tetap	18 Tahun	Magister	Lektor	4	5	5	4	3	4	5	4	4	5	4	4	5	5	3	4	4	3	4	4	3	5	3	4	5	3	4	4	5	5	4	4	4	5	5	3	4	3	5	4	4	5	4	5	4	5
Dosen Tetap	6 tahun	Magister	Tenaga Pengajar	3	3	4	5	5	4	4	4	4	3	5	4	4	4	4	3	4	4	4	4	3	4	4	3	4	4	4	5	4	4	5	5	5	4	4	4	4	5	4	4	4	5	4	5	4	4
Dosen Tetap	6 tahun	Magister	Tenaga Pengajar	3	3	4	5	5	4	4	4	4	3	5	4	4	4	4	3	4	4	4	4	3	4	4	3	4	4	4	5	4	4	5	5	5	4	4	4	4	5	4	4	4	5	4	5	4	4
Dosen Tetap	10 Thn	Magister	Lektor	4	5	5	4	4	4	4	4	4	4	4	4	4	4	3	5	5	4	4	3	4	4	4	3	4	3	3	3	4	4	4	4	4	4	4	4	4	4	3	4	4	4	4	3	4	3
Dosen Tetap	2 tahun 10 bulan	Magister	Asisten Ahli	4	4	4	4	5	5	4	4	4	5	5	5	4	4	4	4	4	4	4	5	4	4	4	4	4	4	3	4	4	4	3	4	3	4	4	3	3	4	3	4	4	4	4	4	5	5
Dosen Tetap	5 thn	Magister	Asisten Ahli	4	3	2	4	4	4	4	3	4	4	4	4	4	4	4	4	5	4	5	5	5	5	5	5	5	5	5	5	5	5	5	5	4	4	5	5	5	5	5	5	5	5	5	5	5	5
Dosen Tetap	2	Magister	Asisten Ahli	4	4	4	4	4	4	4	4	4	4	4	4	4	4	4	4	4	4	4	4	4	4	4	4	4	4	4	4	4	4	4	4	4	4	4	4	4	4	4	4	4	4	4	4	4	4
Universitas Al Azhar Indonesia	3	Doktor	Dosen dengan nomor induk dosen khusus	5	5	5	5	5	5	5	5	5	5	5	5	5	5	5	5	5	5	5	5	5	5	5	5	5	5	5	5	5	5	5	5	5	5	5	4	5	5	5	5	5	5	5	4	5	4
Dosen Tetap	12 tahun	Magister	Lektor	5	5	3	3	2	4	4	4	5	4	5	3	3	3	3	3	3	4	3	4	4	3	5	5	5	2	5	5	4	2	4	2	2	2	2	2	2	4	2	2	4	2	2	2	4	4
Dosen Tetap	16	Magister	Asisten Ahli	5	3	4	4	5	5	5	5	5	5	5	5	5	5	5	5	5	5	5	4	4	5	5	5	4	5	5	5	5	5	5	5	5	5	5	4	5	5	5	5	4	5	5	5	4	5
Dosen Tidak Tetap	Di YPN 12 tahun, di UT 5 tahun	Magister	Lektor Kepala	4	4	4	4	4	5	4	4	4	4	5	5	4	4	4	4	4	4	5	5	5	4	4	4	4	4	4	4	4	4	4	4	4	4	4	4	5	4	4	4	4	4	5	5	5	4
Dosen Tetap	4 tahun	Magister	Asisten Ahli	5	5	1	5	5	5	5	5	5	5	5	5	5	5	5	5	5	5	5	5	5	5	5	5	5	5	5	5	5	5	5	5	5	5	5	5	5	5	5	5	5	5	5	5	5	5
Dosen Tetap	5	Magister	Lektor	5	4	3	4	4	4	4	3	3	3	4	4	4	3	3	4	3	4	4	4	4	4	4	4	4	4	4	4	3	4	4	4	4	4	4	3	4	4	3	3	4	4	4	4	4	3
Dosen Tetap	10 tahun	Magister	Lektor	5	5	4	5	5	5	5	5	5	5	5	5	5	5	5	5	5	5	5	5	5	5	5	5	5	5	5	5	5	4	5	3	5	5	5	5	5	5	5	5	5	5	5	5	5	5
Dosen Tetap	13 tahun	Doktor	Lektor	5	5	5	4	4	5	4	5	5	4	5	5	4	4	4	5	4	4	4	4	4	5	4	4	4	4	4	4	4	4	4	4	4	4	5	4	4	4	4	4	4	4	5	4	5	5
Dosen Tetap	3 tahun	Magister	Asisten Ahli	5	4	5	4	4	4	5	4	5	5	4	5	5	5	5	5	5	5	5	5	5	5	5	4	4	5	3	4	4	4	4	4	4	4	4	4	5	4	4	5	4	4	5	5	4	4
Dosen Tetap	8 tahun	Magister	Asisten Ahli	5	4	3	3	3	5	5	5	5	5	5	5	5	5	5	5	4	4	5	5	4	4	4	4	4	5	1	5	4	4	4	4	5	4	4	4	4	4	3	3	4	3	3	5	5	5
Dosen Tetap	3	Magister	Asisten Ahli	4	3	4	3	3	4	3	4	3	2	3	3	3	3	3	3	3	3	3	4	4	3	3	3	3	2	2	2	4	3	4	3	4	3	4	3	3	4	3	3	4	3	3	2	3	4
Dosen Tetap	4 Tahun	Magister	Asisten Ahli	2	1	1	2	2	2	1	1	1	1	2	1	2	1	1	1	1	2	3	1	1	1	1	1	1	1	1	5	1	4	1	2	3	3	1	1	1	1	1	1	1	1	4	1	3	3
Dosen Tetap	8 tahun	Magister	Lektor	4	3	3	3	4	3	4	3	3	2	3	3	3	3	3	3	3	3	3	3	3	4	4	4	4	2	4	2	4	3	4	3	3	4	3	4	3	3	3	3	4	4	4	3	2	3
Dosen Tetap	9 tahun	Magister	Lektor	3	3	3	3	3	3	3	3	3	3	3	3	3	3	3	3	3	3	3	3	3	3	3	3	3	3	3	3	4	3	4	3	4	3	3	3	3	3	3	3	2	3	4	3	3	3
Dosen Tetap	6 tahun	Magister	Asisten Ahli	5	5	5	5	5	5	5	5	5	4	4	4	4	5	4	4	5	5	5	5	4	4	4	4	4	4	3	3	5	3	3	4	4	4	4	4	3	4	4	4	4	3	3	3	3	3
Dosen Tetap	Universitas Bunda Mulia	Magister	Lektor	3	4	4	5	4	4	3	3	5	5	4	4	4	4	3	4	4	3	4	4	5	3	3	3	4	3	3	4	5	4	3	5	4	4	5	4	4	5	4	4	3	5	4	4	3	4
Dosen Tetap	14 tahun	Magister	Lektor	4	5	4	4	4	4	3	2	3	4	4	3	3	3	2	3	3	3	2	2	3	4	4	3	4	2	3	4	4	3	3	2	3	3	4	2	2	4	3	3	4	4	4	2	2	3
Dosen Tetap	23 tahun	Magister	Lektor	5	5	5	5	5	5	5	5	5	5	5	5	5	5	5	5	4	4	5	4	5	4	5	4	4	5	5	5	5	5	4	4	4	4	5	4	5	5	4	5	4	4	4	4	4	5
Dosen Tetap	2 tahun	Magister	Lektor	3	3	3	2	2	3	3	3	2	3	4	3	3	3	3	2	2	3	2	3	3	3	3	3	3	2	3	3	2	3	2	2	4	2	3	2	3	3	2	2	2	2	2	2	3	3
Dosen Tetap	9 tahun	Magister	Tenaga Pengajar	5	4	4	5	5	5	4	4	5	5	5	5	4	4	4	4	4	4	5	5	5	4	4	4	4	5	5	5	4	5	4	3	4	5	4	5	5	4	4	4	4	5	4	5	5	5
Dosen Tetap	1 tahun	Magister	Tenaga Pengajar	4	3	5	4	3	3	3	3	3	4	3	3	3	4	4	4	4	5	4	3	3	3	3	4	3	3	3	5	3	5	4	4	5	3	3	4	3	4	3	3	5	5	4	3	3	4
Dosen Tetap	4 Tahun	Magister	Asisten Ahli	5	5	5	3	3	5	5	5	4	3	4	4	4	4	3	4	4	4	5	5	3	3	4	4	4	5	5	5	5	5	5	5	5	5	4	4	4	4	5	5	5	5	5	5	5	5
Dosen Homebase	6 tahun	Magister	Asisten Ahli	4	5	4	3	3	3	3	3	3	4	3	3	4	3	3	3	3	3	3	3	2	3	2	3	3	3	3	3	3	4	4	4	4	4	3	4	3	4	3	3	3	4	3	4	3	3
Dosen Tetap	11	Magister	Asisten Ahli	2	4	4	2	2	3	3	4	3	3	4	3	3	3	3	4	3	3	2	3	4	4	3	3	3	1	4	4	4	4	4	3	4	3	3	3	3	5	4	3	4	3	2	3	3	3
Dosen Tetap	30	Doktor	Guru Besar	4	4	3	4	4	4	4	4	3	3	3	3	3	3	3	4	3	3	4	3	3	3	3	3	3	3	4	3	3	4	3	3	3	3	4	4	3	3	3	3	3	3	3	3	3	3
Dosen Tetap	5 tahun	Magister	Lektor	5	5	5	5	5	5	5	4	5	4	5	5	5	5	5	5	4	4	4	4	5	5	5	5	5	4	5	5	5	5	4	5	4	5	5	4	4	4	4	4	5	5	5	5	5	5
Dosen Tetap	18	Doktor	Lektor	4	3	2	2	3	3	4	3	3	3	3	2	3	3	3	4	2	2	2	3	2	3	4	4	3	1	3	4	3	2	2	2	3	3	3	2	2	3	2	3	3	2	3	3	3	2
Dosen Tetap	24 tahun	Doktor	Lektor	4	4	3	4	4	4	4	4	4	4	4	3	3	3	3	3	3	3	4	3	4	3	3	3	3	1	4	3	3	4	2	3	4	3	4	2	3	3	2	2	2	2	2	3	2	2
Dosen Tetap	5 tahun	Magister	Asisten Ahli	5	5	3	4	5	5	4	4	4	4	5	4	3	4	4	4	4	4	5	5	4	4	4	4	4	5	4	4	4	5	4	4	5	4	4	4	4	4	4	4	5	5	5	4	4	4
[truncated: 74 more columns]

## Sheet: Dataproses
Talent Management																													Knowledge Management
Talent Attraction							Talent Development										Talent Retention
Talent Branding	Career Advancement			Work Life Balance			Coaching Talent			Training Need Identification			Appropriate Development Strategies				Competitive Compensation			Employ Motivation			Non- Financial Rewards						Knowledge Transfer						Knowledge Creation
TB1	TC1	TC2	TC3	TB	TB	TB3	TD1	TD2	TD3	TT1	TT2	TT3	TS1	TS2	TS3	Tdev	TK1	TK2	TK3	TM1	TM2	TM3	TF1	TRet	TF2	TF3	TF4	NFR	KT1	KT2	KT3	KT4	KT5	KT6	KC1	KC2	KC3	KC4	KTR1	KC5	KC6	KC7	KC8	KC9	KCR	KC10	KC11	KC12	KTR2
Universitas saya secara aktif membangun reputasi sebagai tempat kerja terbaik bagi para dosen.	Universitas saya kebijakan pengembangan karir disampaikan sangat jelas diinformasikan kepada para dosen.	Universitas saya melakukan perencanaan pengembangan karir para dosen.	Universitas saya memberikan peluang untuk mengembangkan karir.	Universitas saya mengedepankan keseimbangan kehidupan dalam bekerja untuk menjaga motivasi para dosen.	Universitas saya memiliki iklim akademik yang mendukung para dosen.	Universitas saya memiliki kondisi kerja yang baik sehingga dapat menarik dosen berbakat.	Saya secara teratur menerima pelatihan yang memadai.	Universitas saya memberikan peluang untuk mengembangkan para dosen berbakat.	Universitas saya memiliki materi pelatihan yang memadai untuk meningkatkan pengetahuan dan keterampilan para dosen.	Universitas saya melakukan perencanaan kebutuhan pelatihan secara akurat.	Universitas saya mengidentifikasi kompetensi yang dibutuhkan bagi para dosen.	Universitas saya melakukan perencanaan sumber daya manusia untuk memanfaatkan keterampilan para dosen.	Universitas saya telah melakukan strategi pengembangan talenta yang selaras dengan strategi perguruan tinggi.	Universitas saya telah memiliki strategi pengembangan talenta yang dipahami oleh semua dosen.	Univesitas saya melakukan strategi pengembangan talenta untuk memenuhi kebutuhan dosen berbakat.		Universitas saya memiliki sistem kompensasi yang kompetitif didibandingkan dengan perguruan tinggi swasta lain.	Universitas saya mampu memberikan kompensasi yang kompetitif dalam jangka panjang.	Universitas saya berupaya mempertahankan para dosen berbakat yang dibutuhkan untuk mencapai tujuan organisasi.	Universitas saya berusaha untuk menggunakan segala macam cara untuk memotivasi para dosen.	Universitas saya berupaya untuk meningkatkan kepuasan kerja para dosen.	Universitas saya berupaya membuat para dosen selalu termotivasi dalam bekerja.	Universitas saya berupaya mengelola para dosen untuk meningkatkan motivasi kerja.		Universitas saya memberikan penghargaan non-moneter bagi para dosen. (Cth: Benefit, waktu fleksibel, waktu istirahat, parkir gratis atau diskon, diskon keanggotaan gym membership)	Universitas saya memberikan izin bagi para dosen untuk membolehkan pulang lebih awal ketika target yang terpenuhi.	Universitas saya memberikan sistem penghargaan non-finansial untuk mempertahankan dosen berbakat. (contoh. ucapan terima kasih)		Universitas anda mengkategorikan pengetahuan didalam suatu database yang digunakan oleh semua dosen.	Para dosen menggunakan email, kegiatan rapat, dan diskusi untuk berbagi pengetahuan dengan dosen lain.	Universitas saya melakukan penyimpanan informasi penting untuk memudahkan para dosen mendapatkan informasi.	Universitas saya melakukan kegiatan transfer pengalaman satu dosen kepada para dosen lainnya.	Para dosen bersedia untuk berbagi pengetahuan.	Universitas saya mentransfer pengetahuan secara efektif kepada para dosen melalui kursus pelatihan, presentasi atau buletin kampus	Universitas saya melakukan berbagai koordinasi secara intensif pada seluruh divisi/bagian.	Universitas saya menggunakan peran mentor untuk mentransfer pengetahuan bagi para dosen lainnya.	Universitas saya melakukan proses brainstorming untuk menciptakan pengetahuan.	Universitas saya menggunakan alat pembelajaran sebagai sarana kolaborasi pengetahuan.		Universitas saya menggunakan sistem pemecahan masalah berbasis teknologi.	Universitas saya mengadopsi petunjuk keahlian bagi para dosen.	Universitas saya menggunakan akses berbasis web (web-based access) untuk mendapatkan data yang diperlukan.	Universitas saya melakukan penyimpanan informasi yang dapat dipelajari oleh para dosen.	Universitas saya memiliki database atau halaman web yang digunakan untuk sarana ilmu pengetahuan.		Universitas saya melakukan pelatihan di tempat kerja (on the job training) bagi para dosen.	Universitas saya melakukan pembelajaran dengan pendekatan praktik lapangan.	Universitas saya melakukan pembelajaran dengan metode observasi.
4	3	3	4	4	4	5	4	4	4	5	5	5	4	3	4	4.0625	5	5	5	4	4	4	3	4.28571	3	5	4	4	3	3	3	3	3	3	5	3	3	5	3.4	3	3	5	5	5	4.2	3	5	5	4.33333
5	5	4	4	5	5	5	4	4	4	4	3	3	3	4	4	4.125	5	5	5	4	4	4	4	4.42857	2	1	2	1.66667	4	4	5	4	5	4	4	3	4	4	4.1	3	4	5	5	4	4.2	2	2	2	3.16667
5	3	3	5	5	5	5	5	5	5	5	5	5	5	4	4	4.625	5	5	4	4	4	4	4	4.28571	5	1	5	3.66667	4	4	4	4	5	4	4	4	4	4	4.1	3	3	4	3	3	3.2	5	5	5	3.5
3	3	3	4	3	3	4	2	4	2	2	3	3	3	2	2	2.875	4	4	4	3	3	3	3	3.42857	3	3	4	3.33333	3	2	5	5	4	3	3	3	3	3	3.4	2	2	2	2	3	2.2	3	3	3	4
5	5	5	5	4	4	4	5	4	4	4	5	4	4	4	4	4.375	4	4	4	3	5	4	4	4	5	3	5	4.33333	5	5	5	5	4	5	4	3	4	4	4.4	4	4	5	5	5	4.6	3	4	4	3.33333
2	4	3	3	2	2	2	2	2	2	2	2	2	2	2	2	2.25	2	2	3	2	2	3	2	2.28571	2	3	4	3	2	4	2	4	4	4	2	2	2	2	2.8	2	4	3	3	3	3	2	3	3	3.16667
5	4	4	4	5	4	5	5	4	5	5	5	5	5	5	5	4.6875	5	5	5	5	5	4	4	4.71429	5	3	4	4	4	4	4	4	4	4	4	4	5	4	4.1	4	5	4	4	5	4.4	5	4	4	3.5
5	4	4	5	5	5	5	3	4	4	4	4	5	5	4	4	4.375	4	4	5	5	5	5	5	4.71429	5	5	5	5	4	5	5	5	5	5	5	5	5	5	4.9	5	5	5	5	5	5	5	5	5	4.66667
4	5	5	4	5	5	4	5	5	5	4	4	4	4	4	4	4.4375	4	4	4	4	5	4	5	4.28571	3	4	5	4	5	5	4	4	4	5	5	4	5	4	4.5	5	5	4	5	5	4.8	3	3	3	4
4	4	4	4	5	4	4	4	4	3	4	4	3	5	4	4	4	5	4	4	4	4	4	4	4.14286	5	5	4	4.66667	3	5	4	3	3	4	4	3	4	5	3.8	4	4	5	5	5	4.6	2	3	3	2.83333
4	4	4	4	4	4	3	3	3	3	3	3	3	4	3	3	3.4375	4	3	3	3	3	3	3	3.14286	3	4	3	3.33333	3	4	3	3	3	3	4	4	3	3	3.3	3	3	3	3	3	3	3	3	3	2.83333
5	4	4	4	4	5	4	4	4	3	4	3	3	4	2	3	3.75	4	3	2	3	3	3	4	3.14286	2	1	3	2	4	5	2	5	5	3	5	2	3	4	3.8	4	4	4	4	4	4	4	5	4	3.66667
5	4	5	5	4	4	4	4	5	4	3	4	4	4	4	4	4.1875	5	5	4	4	4	4	4	4.28571	5	4	4	4.33333	4	5	4	4	5	4	4	4	4	4	4.2	4	4	5	5	5	4.6	4	4	4	4.16667
4	5	5	4	3	4	4	4	4	4	3	4	4	3	3	4	3.875	4	4	4	4	3	4	3	3.71429	3	4	4	3.66667	3	5	4	3	4	4	4	3	4	4	3.8	3	3	4	4	3	3.4	4	3	3	3.66667
5	3	4	4	4	4	4	4	4	4	4	4	4	4	4	4	4	5	4	4	4	4	4	4	4.14286	5	4	4	4.33333	4	5	5	4	5	5	4	4	4	4	4.4	3	4	4	4	5	4	5	5	4	4
5	5	5	5	4	4	4	4	5	4	4	4	4	4	4	4	4.3125	4	4	4	4	4	4	4	4	4	4	4	4	4	4	4	4	4	4	4	4	4	4	4	4	4	4	4	4	4	5	4	4	4.5
5	5	5	5	5	5	5	5	5	5	5	5	5	5	5	5	5	5	5	5	5	5	5	5	5	5	3	5	4.33333	5	5	5	5	5	5	5	5	5	5	5	4	5	5	5	5	4.8	5	5	5	4.66667
5	4	5	5	5	5	5	4	5	4	5	4	5	5	5	5	4.75	4	5	4	5	4	5	5	4.57143	4	4	5	4.33333	5	5	4	5	5	5	5	4	5	5	4.8	5	5	5	5	5	5	5	5	5	5
3	1	1	1	1	1	1	1	1	1	1	1	1	1	1	1	1.125	1	1	1	1	1	1	1	1	1	1	1	1	1	1	1	1	1	1	1	1	1	1	1	1	1	1	1	1	1	1	1	1	3
5	4	4	5	4	4	4	3	4	4	4	4	4	3	3	4	3.9375	4	4	4	4	4	4	4	4	2	2	2	2	4	4	4	4	5	4	4	4	4	4	4.1	4	4	4	4	4	4	4	4	4	2.5
4	3	4	4	4	4	3	4	4	4	3	4	5	4	4	4	3.875	3	3	3	4	4	4	4	3.57143	5	5	5	5	4	5	5	5	4	4	4	4	5	5	4.5	3	4	5	4	4	4	5	4	4	4.16667
3	3	4	5	2	4	3	2	4	2	2	2	3	4	3	3	3.0625	4	4	3	3	2	3	3	3.14286	4	5	5	4.66667	2	4	2	5	5	4	3	4	2	3	3.4	3	2	3	2	2	2.4	4	5	4	4.33333
5	5	5	5	5	5	5	5	5	5	5	5	5	5	4	4	4.875	5	4	5	4	5	4	4	4.42857	5	5	5	5	5	5	4	4	4	4	5	4	5	5	4.5	4	5	4	4	4	4.2	4	4	5	4.33333
5	5	5	5	5	5	5	5	5	5	5	5	5	5	5	5	5	4	4	5	5	5	5	5	4.71429	5	1	5	3.66667	5	5	5	5	5	5	5	5	5	5	5	5	5	5	5	5	5	5	5	5	4.66667
4	4	4	4	3	5	5	5	5	4	4	5	5	5	4	4	4.375	3	4	4	4	4	4	4	3.85714	3	3	5	3.66667	4	4	4	4	4	4	4	4	3	4	3.9	3	4	4	3	3	3.4	3	3	3	4
5	5	5	5	5	5	5	5	5	5	5	5	5	5	5	5	5	4	4	4	4	4	4	4	4	4	3	5	4	5	5	5	5	4	5	5	5	5	5	4.9	5	5	5	5	5	5	5	5	5	4
5	3	3	4	4	3	3	4	1	3	3	3	4	4	4	4	3.4375	4	4	4	4	3	3	3	3.57143	3	3	3	3	3	4	3	4	3	4	3	3	4	4	3.5	3	3	3	3	3	3	4	4	4	4.5
5	4	5	4	4	4	4	5	4	5	5	4	5	5	4	4	4.4375	4	5	4	4	4	5	4	4.28571	4	4	4	4	4	5	5	4	4	4	4	4	4	5	4.3	4	4	4	4	4	4	4	4	4	4
4	3	3	4	4	4	4	3	3	3	3	3	3	3	3	3	3.3125	3	3	4	4	3	4	4	3.57143	3	3	3	3	3	3	3	3	3	3	3	3	3	3	3	3	3	3	3	3	3	3	3	3	3.5
5	5	5	5	5	5	5	5	5	5	5	5	5	5	5	5	5	4	4	5	4	4	4	4	4.14286	4	4	4	4	5	5	5	5	5	5	5	4	5	5	4.9	4	5	5	5	5	4.8	5	5	5	4
4	5	5	5	4	4	4	3	4	4	4	4	5	5	3	4	4.1875	3	3	4	4	4	3	3	3.42857	5	5	4	4.66667	5	5	4	4	5	5	3	5	4	5	4.5	5	3	5	5	4	4.4	5	4	4	4.66667
5	4	3	3	3	4	4	3	3	3	3	3	3	3	3	3	3.3125	3	4	4	4	4	3	4	3.71429	3	4	3	3.33333	3	4	4	4	5	4	4	3	4	4	3.9	3	3	4	3	3	3.2	3	4	4	4
5	5	5	5	4	4	5	5	5	5	4	4	4	4	4	4	4.5	5	5	5	4	4	4	4	4.42857	5	5	5	5	4	5	4	3	4	5	4	5	5	4	4.3	4	4	4	5	4	4.2	5	5	5	4.33333
4	4	3	3	3	3	3	4	3	3	3	4	4	4	4	5	3.5625	4	3	3	3	3	4	3	3.28571	3	3	5	3.66667	3	5	4	4	5	3	3	4	3	4	3.8	3	3	5	5	4	4	3	3	4	4.16667
4	4	4	4	5	4	4	3	3	3	3	4	4	4	4	3	3.75	4	4	3	3	3	3	3	3.28571	4	4	4	4	4	4	4	4	5	4	4	5	4	5	4.3	5	5	5	4	4	4.6	4	4	4	3.66667
5	3	4	4	4	4	4	4	4	4	4	4	4	4	4	4	4	5	4	4	4	4	4	4	4.14286	4	4	5	4.33333	5	5	5	5	4	5	5	4	4	4	4.6	4	4	4	4	4	4	4	4	4	4
5	5	5	5	5	4	5	4	5	5	5	5	5	5	4	4	4.75	4	4	5	5	5	5	5	4.71429	4	5	5	4.66667	5	5	4	5	4	5	5	4	4	4	4.5	4	4	5	5	5	4.6	5	5	5	4.5
5	5	5	5	3	4	5	5	4	4	4	4	4	4	5	4	4.375	5	3	5	5	4	4	5	4.42857	5	5	5	5	5	4	4	4	5	4	5	4	4	5	4.4	4	4	4	5	5	4.4	5	5	5	5
4	4	4	4	4	4	5	5	5	5	5	4	4	5	4	4	4.375	4	4	4	5	5	5	5	4.57143	4	4	5	4.33333	4	5	4	4	5	4	4	4	4	5	4.3	5	5	4	4	4	4.4	4	4	4	4.5
1	1	1	1	1	1	1	1	1	1	1	2	1	1	1	1	1.0625	1	1	1	1	1	1	1	1	1	1	1	1	1	1	1	2	1	2	1	1	1	1	1.2	1	1	3	3	1	1.8	1	1	1	2.5
2	1	1	1	1	1	2	1	1	1	1	1	1	1	1	1	1.125	1	1	1	1	1	1	1	1	4	3	1	2.66667	1	3	1	1	3	1	3	1	1	1	1.6	1	1	4	3	3	2.4	1	3	3	1.66667
5	1	2	3	3	3	4	2	3	3	2	2	2	2	3	3	2.6875	1	1	3	1	3	3	3	2.14286	1	3	3	2.33333	3	4	4	2	5	3	3	4	3	5	3.6	4	3	3	5	4	3.8	1	4	3	2.5
4	3	3	4	4	3	3	4	4	4	3	4	4	4	3	3	3.5625	4	3	3	3	4	3	3	3.28571	3	3	4	3.33333	4	3	4	3	4	4	3	4	3	4	3.6	4	3	4	3	4	3.6	4	4	3	3.16667
5	3	3	5	5	5	4	3	4	4	4	4	3	4	4	4	4	5	5	3	3	4	4	4	4	5	5	5	5	5	5	5	5	5	5	4	4	4	4	4.6	5	5	5	5	5	5	5	5	5	4.33333
4	4	4	4	5	5	5	3	4	4	4	4	5	4	4	4	4.1875	5	4	5	4	5	4	4	4.42857	5	3	5	4.33333	5	5	5	4	5	4	4	3	4	4	4.3	4	4	4	4	4	4	4	5	4	4.66667
4	4	4	4	5	3	3	4	3	4	3	2	3	3	4	3	3.5	5	4	3	3	4	3	3	3.57143	4	5	3	4	2	3	3	4	4	4	3	3	3	3	3.2	3	2	4	3	3	3	3	3	3	3.66667
5	4	5	4	3	4	4	5	4	5	4	4	4	4	3	4	4.125	4	4	4	4	5	4	4	4.14286	4	2	4	3.33333	5	5	4	4	4	4	5	3	2	4	4	4	4	5	5	5	4.6	4	4	3	3.33333
2	2	2	3	3	4	3	3	4	3	3	3	3	4	3	3	3	2	3	4	4	3	3	3	3.14286	1	4	4	3	4	4	4	3	4	3	3	3	3	5	3.6	4	3	4	3	2	3.2	3	3	3	3.33333
1	1	1	1	1	1	2	1	1	1	1	1	1	1	1	1	1.0625	1	1	1	1	1	1	1	1	1	1	1	1	1	1	1	1	1	1	1	1	1	1	1	1	1	1	1	1	1	1	1	1	2
2	2	2	2	1	1	1	1	2	1	2	1	1	1	1	2	1.4375	3	1	1	1	1	1	1	1.28571	1	1	5	2.33333	1	4	1	2	3	3	1	1	1	1	1.8	1	1	1	1	4	1.6	1	3	3	1.66667
4	3	2	2	3	3	2	2	2	2	2	2	2	2	2	2	2.3125	2	2	4	2	2	2	3	2.42857	2	3	2	2.33333	2	2	2	2	3	2	2	2	2	2	2.1	3	2	4	4	3	3.2	2	2	2	2.16667
4	2	3	3	4	3	3	3	3	2	3	3	3	4	2	2	2.9375	2	3	2	3	4	4	3	3	1	3	4	2.66667	3	2	2	2	3	3	3	2	2	3	2.5	2	3	3	2	3	2.6	3	3	2	2.33333
5	3	4	4	4	4	5	4	5	3	5	4	4	3	3	3	3.9375	5	5	5	5	5	5	5	5	2	5	5	4	4	4	5	4	5	4	5	4	4	4	4.3	4	4	5	5	5	4.6	4	5	5	3.66667
5	3	4	3	3	3	3	5	4	4	3	4	4	4	3	4	3.6875	3	3	3	3	3	3	3	3	3	3	5	3.66667	4	4	4	4	3	4	4	3	4	4	3.8	5	4	4	5	4	4.4	5	4	3	4.33333
4	4	3	3	4	4	3	2	3	2	2	4	3	2	2	2	2.9375	4	2	2	2	3	3	4	2.85714	2	3	4	3	2	5	3	2	2	2	3	2	4	3	2.8	4	2	4	2	3	3	2	4	4	3.66667
2	2	2	2	2	2	2	2	2	2	3	3	2	2	3	3	2.25	3	2	2	2	3	2	3	2.42857	3	3	3	3	2	2	2	3	3	3	2	2	2	2	2.3	3	2	2	2	3	2.4	3	3	2	3
4	2	2	2	4	4	4	2	2	2	3	2	3	2	2	2	2.625	2	3	2	2	2	2	2	2.14286	3	2	2	2.33333	2	2	2	2	2	2	2	2	3	2	2.1	2	2	2	2	2	2	3	2	2	2.5
5	3	3	4	5	5	5	2	4	3	3	3	4	5	3	3	3.75	5	4	4	4	5	5	3	4.28571	3	3	3	3	3	5	3	3	5	5	4	4	4	5	4.1	4	4	3	3	3	3.4	3	4	2	2.66667
3	3	4	4	3	3	3	4	4	4	2	2	2	3	2	2	3	2	2	3	2	2	2	3	2.28571	1	4	3	2.66667	2	4	3	4	4	3	3	2	2	4	3.1	3	3	2	3	2	2.6	3	3	3	3
2	2	3	3	2	3	4	5	2	4	3	4	4	4	4	3	3.25	3	3	3	3	3	3	4	3.14286	3	4	3	3.33333	3	4	3	3	3	3	3	2	4	3	3.1	3	4	3	3	4	3.4	3	3	4	3.16667
1	1	1	1	1	1	1	2	1	1	1	1	1	1	1	1	1.0625	1	1	5	1	1	1	1	1.57143	1	1	4	2	4	1	4	1	4	1	4	1	1	3	2.4	1	1	4	4	4	2.8	1	1	1	2.16667
3	4	3	5	1	5	3	4	3	2	2	2	1	1	1	1	2.5625	5	4	3	2	1	2	1	2.57143	2	1	4	2.33333	1	4	1	3	5	2	2	1	1	3	2.3	2	1	3	2	2	2	3	3	3	2
4	5	5	5	4	5	4	3	5	3	3	5	4	5	3	5	4.25	3	3	5	4	3	4	3	3.57143	5	2	3	3.33333	5	4	5	4	4	4	5	4	4	4	4.3	5	4	5	4	5	4.6	4	4	4	3.5
5	5	5	5	5	5	5	4	4	4	4	4	4	4	4	5	4.5	3	4	4	4	5	4	4	4	5	3	5	4.33333	4	4	4	4	4	4	4	4	4	4	4	5	4	5	4	4	4.4	4	4	5	4.16667
4	4	4	4	4	4	4	5	5	4	5	4	5	4	4	4	4.25	3	3	4	4	5	4	4	3.85714	4	5	4	4.33333	5	5	4	5	5	4	4	4	4	5	4.5	4	4	4	4	5	4.2	5	5	5	4.66667
5	5	5	5	5	4	4	4	5	5	5	5	5	4	4	4	4.625	5	5	5	5	5	5	5	5	5	5	5	5	5	5	5	4	4	4	5	5	5	5	4.7	5	5	5	5	5	5	4	4	5	4.66667
5	5	5	5	5	5	5	4	5	4	4	5	5	5	4	5	4.75	5	5	5	5	5	5	5	5	5	3	2	3.33333	4	5	5	5	5	5	5	5	5	5	4.9	5	5	5	5	5	5	5	5	5	4.66667
4	4	4	4	4	4	4	5	4	4	4	4	4	4	4	4	4.0625	4	4	3	4	4	4	4	3.85714	4	2	4	3.33333	5	5	4	5	4	4	4	4	4	4	4.3	4	4	5	4	5	4.4	4	4	4	4.5
5	4	5	5	4	5	5	5	5	4	4	5	5	4	4	5	4.625	3	4	4	4	5	4	5	4.14286	3	3	4	3.33333	5	3	5	5	5	5	4	4	5	5	4.6	4	4	4	4	4	4	4	4	4	4
5	5	5	5	5	5	5	5	5	5	5	5	5	5	5	5	5	5	5	5	5	5	5	5	5	5	5	5	5	5	5	5	5	5	5	5	5	5	5	5	5	5	5	5	5	5	5	5	5	4.5
4	3	2	4	4	3	3	4	3	3	2	2	2	2	3	3	2.9375	2	2	2	3	3	3	2	2.42857	4	2	4	3.33333	4	4	4	3	4	4	3	3	2	4	3.5	3	3	4	4	2	3.2	3	4	4	4.33333
5	4	5	5	4	5	4	4	4	4	4	4	4	4	4	4	4.25	4	4	4	4	4	4	4	4	4	4	4	4	4	5	4	3	4	4	4	4	4	4	4	5	4	5	4	5	4.6	5	4	4	4
5	3	3	3	3	4	4	3	3	4	3	3	3	3	3	3	3.3125	4	4	4	3	3	3	3	3.42857	2	2	4	2.66667	3	4	3	4	4	4	4	2	2	4	3.4	4	4	4	3	3	3.6	3	4	3	3.83333
5	5	5	5	5	4	4	4	5	4	4	4	4	4	4	4	4.375	5	5	5	5	5	5	5	5	5	5	5	5	5	5	5	5	5	4	5	5	5	5	4.9	5	5	5	5	5	5	5	5	5	4.16667
5	5	4	4	4	5	4	5	5	5	4	4	4	5	5	5	4.5625	5	5	5	5	4	5	4	4.71429	4	3	4	3.66667	4	5	5	5	5	5	5	5	4	5	4.8	4	4	5	5	5	4.6	5	5	4	4.83333
5	4	4	4	5	4	4	4	4	5	4	4	4	4	4	4	4.1875	5	5	4	4	4	5	5	4.57143	5	5	4	4.66667	4	5	4	4	4	4	4	4	4	4	4.1	4	4	4	4	4	4	4	5	4	4.5
5	4	4	5	4	4	4	4	4	4	4	4	4	4	4	4	4.125	4	4	4	4	4	4	4	4	4	4	4	4	5	5	5	5	4	5	5	4	4	5	4.7	5	4	5	5	4	4.6	5	5	5	4.66667
5	5	4	5	5	5	4	4	4	4	4	4	4	4	4	4	4.3125	5	5	4	5	4	5	5	4.71429	2	3	4	3	4	4	4	4	5	4	5	4	4	5	4.3	4	4	3	4	3	3.6	4	4	4	4.5
4	3	2	4	4	4	4	4	4	3	2	3	3	4	3	3	3.375	4	4	2	3	4	3	2	3.14286	4	2	4	3.33333	4	4	4	2	4	2	4	2	3	4	3.3	4	4	4	4	3	3.8	3	4	3	3.66667
5	5	4	4	5	5	5	4	4	4	3	4	4	4	4	4	4.25	4	4	4	4	4	5	4	4.14286	4	4	4	4	4	4	4	4	4	4	4	4	4	4	4	4	4	4	4	4	4	4	4	4	3.66667
4	4	4	4	4	3	3	4	4	3	3	3	3	3	3	3	3.4375	3	3	3	3	4	4	4	3.42857	1	2	4	2.33333	3	5	3	3	4	3	3	3	3	3	3.3	3	3	4	4	3	3.4	3	4	4	3.83333
5	4	4	4	5	5	5	5	5	4	4	4	4	4	4	4	4.375	5	5	5	4	5	4	4	4.57143	5	3	4	4	4	5	4	4	4	4	5	4	4	4	4.2	4	4	3	3	4	3.6	4	4	4	3.83333
4	3	3	3	3	4	3	3	4	4	3	3	3	4	4	4	3.4375	3	3	3	3	4	4	4	3.42857	4	4	5	4.33333	4	3	4	4	5	4	3	4	4	4	3.9	3	4	4	4	4	3.8	3	4	4	3.83333
5	5	5	5	5	5	5	5	5	5	5	5	5	5	5	5	5	4	4	5	5	5	5	5	4.71429	5	5	5	5	5	4	5	5	5	5	5	5	5	5	4.9	5	5	5	5	5	5	5	5	5	4.33333
5	5	5	5	5	5	5	5	5	5	5	5	5	5	5	5	5	5	4	5	5	5	5	5	4.85714	4	4	5	4.33333	5	5	5	5	5	5	5	5	5	5	5	5	5	5	5	5	5	5	5	4	4.83333
5	4	4	4	4	4	4	3	4	4	4	4	4	4	4	4	4	3	3	4	3	4	4	4	3.57143	4	4	4	4	4	4	4	4	4	4	4	4	4	4	4	4	4	4	4	4	4	4	4	4	4.33333
4	5	5	5	3	5	4	4	5	5	5	5	3	4	3	4	4.3125	4	4	4	3	4	5	4	4	3	5	3	3.66667	4	3	4	4	5	4	4	3	5	4	4	4	4	4	5	5	4.4	4	4	4	4
5	5	4	5	4	5	4	4	4	4	4	5	4	4	4	4	4.3125	4	3	4	3	4	4	4	3.71429	3	4	4	3.66667	3	5	4	5	5	4	4	3	5	4	4.2	4	4	4	3	3	3.6	4	3	3	3.66667
4	5	5	5	3	3	3	4	3	3	3	3	3	3	3	3	3.5	3	3	4	4	4	3	3	3.42857	5	5	4	4.66667	4	3	3	3	3	3	4	3	3	3	3.2	3	3	2	2	2	2.4	3	2	2	2.83333
5	3	3	4	2	4	4	2	4	3	3	2	2	2	2	2	2.9375	4	3	4	3	4	4	3	3.57143	2	5	2	3	5	5	5	5	5	4	5	4	5	5	4.8	4	3	2	2	2	2.6	5	4	1	2.83333
5	4	4	5	5	4	4	4	4	4	4	5	4	5	4	4	4.3125	5	4	4	4	5	4	5	4.42857	5	4	4	4.33333	4	4	4	4	5	5	4	4	5	5	4.4	4	4	4	5	5	4.4	4	5	4	3.83333
5	5	5	5	5	5	5	5	5	5	5	5	5	5	5	5	5	5	5	5	5	5	5	5	5	5	5	5	5	5	5	5	5	5	5	5	5	5	5	5	5	5	5	5	5	5	5	5	5	4.66667
5	5	3	4	3	4	4	3	4	4	4	3	3	4	4	4	3.8125	4	4	4	4	4	4	4	4	5	4	5	4.66667	4	4	3	3	4	4	4	4	4	4	3.8	3	4	4	3	4	3.6	4	5	4	4.66667
5	5	5	5	4	4	4	4	5	4	4	4	4	4	4	4	4.3125	4	4	4	4	4	4	4	4	4	3	4	3.66667	4	5	4	4	4	4	4	4	4	4	4.1	4	4	4	4	4	4	4	4	4	4.16667
3	1	2	2	2	2	2	1	3	1	1	2	2	2	2	1	1.8125	1	1	3	3	2	2	2	2	1	3	1	1.66667	2	1	1	1	3	1	3	1	3	1	1.7	1	1	1	1	1	1	1	1	1	2.5
5	5	5	5	5	5	5	5	5	5	5	5	5	5	5	5	5	5	5	5	5	5	5	5	5	5	5	5	5	5	5	5	5	5	5	5	5	5	5	5	5	5	5	5	5	5	5	5	5	3
3	3	2	4	2	2	3	4	4	2	3	4	3	3	3	3	3	2	4	4	4	2	3	3	3.14286	2	3	3	2.66667	3	2	3	2	3	3	4	4	3	4	3.1	2	2	2	2	2	2	3	3	3	4
5	5	5	5	5	5	5	5	5	5	5	5	5	5	5	5	5	5	5	5	5	5	2	5	4.57143	4	1	5	3.33333	5	5	5	5	5	5	5	5	5	5	5	5	5	5	5	5	5	5	5	5	4
5	4	5	4	4	4	4	4	4	5	4	4	4	4	4	4	4.1875	4	4	4	4	4	4	4	4	5	5	4	4.66667	5	5	5	4	4	5	5	4	4	5	4.6	4	4	4	4	4	4	4	4	4	4.5
5	4	4	3	3	4	3	4	4	4	4	4	4	3	3	3	3.6875	3	3	3	4	4	4	4	3.57143	4	3	4	3.66667	4	4	4	4	4	4	4	4	4	4	4	4	4	4	4	4	4	4	4	4	4
5	4	5	5	5	5	5	5	5	4	4	4	4	4	4	4	4.5	3	4	4	4	4	4	4	3.85714	4	4	4	4	4	4	5	5	5	5	4	4	4	4	4.4	4	5	5	5	5	4.8	5	5	5	4.5
4	5	4	5	3	3	3	3	4	3	3	4	4	3	3	3	3.5625	3	3	2	3	4	3	3	3	3	4	3	3.33333	2	3	3	3	4	4	3	3	3	3	3.1	4	3	2	2	2	2.6	4	4	3	4.33333
5	5	4	4	3	4	3	3	4	2	3	4	4	4	3	3	3.625	3	4	3	3	3	3	3	3.14286	2	3	2	2.33333	4	4	4	2	4	4	3	2	4	4	3.5	4	4	4	4	4	4	4	4	4	3.83333
5	4	4	4	3	4	4	3	3	3	3	3	4	4	3	4	3.625	3	3	3	4	4	4	4	3.57143	4	3	4	3.66667	3	2	3	3	3	3	4	3	4	4	3.2	3	4	4	3	3	3.4	3	4	3	3.66667
5	5	4	4	3	4	3	5	4	5	4	4	4	4	4	4	4.125	2	3	4	4	3	3	3	3.14286	1	2	2	1.66667	5	4	4	4	4	4	4	4	4	4	4.1	4	4	4	5	5	4.4	4	3	3	3.33333
4	4	3	4	4	3	3	3	3	3	3	3	3	4	3	4	3.375	4	3	3	4	3	4	4	3.57143	3	3	3	3	4	3	3	3	3	3	4	3	3	4	3.3	3	3	4	4	3	3.4	3	4	4	3.5
4	2	2	3	4	2	2	3	4	3	2	2	2	2	1	2	2.5	2	2	3	3	4	2	3	2.71429	2	4	4	3.33333	1	1	2	2	4	3	2	3	3	3	2.4	1	1	1	1	1	1	2	4	3	3.33333
5	5	5	5	5	5	5	5	5	5	5	5	5	5	5	5	5	5	5	5	5	5	5	5	5	5	5	5	5	5	5	5	5	5	5	5	5	5	5	5	5	5	5	5	5	5	5	5	5	4
5	5	5	5	5	5	5	5	5	5	5	5	5	5	5	5	5	5	5	5	5	5	5	5	5	5	5	5	5	5	5	5	5	5	5	5	5	5	5	5	5	5	5	5	5	5	5	5	5	5
5	5	5	5	5	5	5	5	5	5	5	5	5	5	5	5	5	5	5	5	5	5	5	5	5	5	5	5	5	5	5	5	5	5	5	5	5	5	5	5	5	5	5	5	5	5	5	5	5	5
4	3	5	3	5	3	4	3	4	3	3	3	4	3	3	3	3.5	3	3	4	3	3	3	3	3.14286	2	5	4	3.66667	3	3	3	3	4	3	4	2	3	4	3.2	3	4	3	3	2	3	3	4	4	4.33333
5	4	5	5	4	4	4	4	4	4	4	4	5	4	4	4	4.25	4	4	4	4	4	5	4	4.14286	4	4	4	4	4	4	5	4	4	4	4	4	4	4	4.1	4	4	4	4	4	4	4	5	4	4
4	4	3	4	4	4	4	3	4	3	3	3	3	3	3	3	3.4375	4	4	4	3	4	4	4	3.85714	3	4	4	3.66667	3	4	3	4	4	4	3	3	3	3	3.4	3	3	3	4	4	3.4	4	3	3	3.83333
3	4	3	3	4	4	3	3	3	3	3	3	4	3	3	4	3.3125	3	3	3	3	3	4	3	3.14286	4	5	4	4.33333	4	5	4	3	4	3	3	3	3	3	3.5	3	3	3	3	3	3	3	3	3	3.16667
5	5	5	5	5	5	5	5	5	5	5	5	5	5	5	5	5	5	5	5	5	5	5	5	5	5	5	5	5	4	4	4	5	5	5	5	4	4	4	4.4	4	4	4	4	4	4	5	5	5	4
5	4	5	5	5	5	5	5	5	5	5	5	5	4	4	4	4.75	5	5	5	5	5	5	5	5	4	5	5	4.66667	4	4	5	5	5	5	5	5	5	5	4.8	4	4	4	4	4	4	5	4	4	4.66667
5	5	5	5	5	5	5	5	5	5	5	5	5	5	5	5	5	5	5	5	5	5	5	5	5	5	5	5	5	5	5	5	5	5	5	5	5	5	5	5	5	5	4	5	4	4.6	5	5	5	4.66667
5	5	5	5	5	5	4	4	5	4	4	4	4	4	4	4	4.4375	4	5	5	5	5	5	5	4.85714	5	5	5	5	3	4	3	4	5	4	4	4	4	4	3.9	3	3	3	4	4	3.4	3	4	3	4.16667
4	3	3	4	3	4	3	2	3	3	3	3	3	3	3	3	3.125	3	4	4	3	3	3	3	3.28571	2	2	2	2	4	3	4	3	4	3	4	3	3	4	3.5	3	3	4	3	3	3.2	2	3	4	3.16667
5	5	5	5	5	5	5	5	5	5	5	5	5	5	5	5	5	1	1	4	2	3	4	4	2.71429	3	4	4	3.66667	4	4	5	4	4	4	4	3	4	4	4	4	4	3	4	4	3.8	4	4	4	3.5
4	4	4	5	4	4	4	4	4	4	4	5	4	4	3	3	4	3	3	4	4	4	4	4	3.71429	3	3	4	3.33333	3	4	5	3	5	4	4	4	4	4	4	3	4	5	5	4	4.2	3	4	4	3.83333
4	4	5	4	5	4	4	5	4	4	4	5	4	4	5	4	4.3125	4	4	4	4	4	4	4	4	5	4	5	4.66667	4	5	5	4	4	5	4	4	4	5	4.4	4	4	4	5	5	4.4	5	4	5	4.16667
5	5	5	5	4	3	5	5	5	4	5	4	4	4	5	4	4.5	4	4	4	4	4	4	5	4.14286	2	2	5	3	2	5	5	5	5	4	5	5	5	5	4.6	5	5	5	5	5	5	4	4	3	4.16667
4	3	3	4	3	3	3	3	4	2	3	2	3	2	2	2	2.875	2	2	3	2	2	2	2	2.14286	2	2	4	2.66667	3	4	4	4	5	4	4	2	2	3	3.5	2	2	4	4	4	3.2	2	4	4	3.5
5	5	5	5	5	5	5	5	5	5	5	5	5	5	4	4	4.875	2	2	3	4	4	4	5	3.42857	3	5	5	4.33333	5	5	4	4	5	5	5	5	5	3	4.6	3	3	5	3	3	3.4	5	4	4	3.83333
4	4	4	4	4	4	4	4	4	4	4	4	4	4	4	4	4	4	4	4	4	4	4	4	4	4	4	4	4	4	4	4	4	4	4	4	4	4	4	4	4	4	4	4	4	4	4	4	4	4.16667
5	5	5	5	5	5	4	4	4	4	4	4	4	4	4	4	4.375	4	4	4	4	4	4	4	4	4	3	4	3.66667	4	5	5	4	4	4	4	4	4	4	4.2	4	4	4	4	4	4	4	4	4	4
4	4	4	5	4	5	4	5	5	5	4	4	4	5	4	4	4.375	4	4	5	4	4	4	4	4.14286	3	2	3	2.66667	3	5	4	4	5	5	4	3	4	5	4.2	5	4	4	3	3	3.8	5	5	5	4.5
4	4	5	5	4	4	4	3	4	4	4	4	4	4	4	4	4.0625	4	3	4	4	4	4	4	3.85714	3	3	3	3	4	4	4	4	4	4	4	4	4	4	4	4	4	4	4	4	4	4	5	4	4.66667
5	5	5	4	4	5	5	5	3	4	4	3	3	4	5	4	4.25	4	5	4	3	4	3	4	3.85714	3	4	5	4	5	4	4	5	4	3	4	3	5	3	4	4	3	4	3	4	3.6	4	5	3	4.16667
5	5	4	5	5	5	5	4	5	5	5	5	5	5	4	4	4.75	5	5	5	5	5	5	5	5	4	5	4	4.33333	5	4	4	4	5	5	5	4	5	5	4.6	5	5	5	4	5	4.8	5	5	4	4.33333
4	3	3	4	4	4	4	3	4	3	4	4	4	4	4	4	3.75	4	4	4	4	4	3	4	3.85714	5	4	4	4.33333	4	3	3	3	4	4	3	4	3	4	3.5	3	3	3	3	3	3	3	3	3	3.83333
5	5	5	5	5	4	4	4	4	4	5	5	5	4	4	4	4.5	4	4	4	4	4	4	4	4	4	4	4	4	4	4	4	4	4	4	4	4	4	4	4	4	4	4	4	4	4	4	4	4	3.5
4	3	4	3	4	3	3	2	3	3	3	3	3	3	3	3	3.125	3	3	3	4	4	4	4	3.57143	2	4	2	2.66667	4	3	4	3	3	4	3	4	3	3	3.4	3	3	4	4	4	3.6	3	2	3	3.33333
4	3	3	3	4	4	4	4	3	3	3	3	4	3	3	4	3.4375	3	3	4	3	3	3	3	3.14286	4	5	4	4.33333	4	3	3	4	4	3	3	4	4	4	3.6	4	4	4	3	4	3.8	4	4	4	3.33333
3	3	3	3	3	3	3	3	3	3	3	3	3	3	3	3	3	3	3	3	3	3	3	3	3	3	3	3	3	4	3	4	3	4	3	3	3	3	3	3.3	3	3	2	3	4	3	3	3	3	3.5
5	5	5	5	5	5	5	5	5	5	5	5	5	5	5	5	5	5	5	5	5	5	5	5	5	5	5	5	5	5	5	5	5	5	5	5	5	5	5	5	5	5	5	5	5	5	5	5	5	4
4	4	4	4	3	4	4	3	4	3	3	3	3	3	3	3	3.4375	5	4	3	3	3	3	3	3.42857	5	4	4	4.33333	3	4	4	3	4	3	4	3	3	4	3.5	3	3	4	4	4	3.6	4	4	4	4.5
4	3	4	4	3	3	3	2	2	2	2	2	2	2	2	2	2.625	4	4	3	3	3	3	3	3.28571	2	4	3	3	4	3	4	3	3	2	4	2	2	2	2.9	3	3	4	4	4	3.6	2	2	3	3.16667
5	4	3	4	4	4	4	3	3	4	3	3	3	3	3	3	3.5	4	4	4	3	3	4	3	3.57143	4	4	4	4	3	4	4	4	4	4	4	3	4	4	3.8	4	3	4	4	4	3.8	4	4	4	3.16667
5	4	5	5	5	5	5	4	4	4	4	5	4	4	4	4	4.4375	4	4	5	3	3	5	5	4.14286	5	5	5	5	4	3	3	3	4	4	5	3	4	4	3.7	5	5	5	5	5	5	5	4	4	4.16667
4	2	2	2	3	4	2	4	4	4	4	4	2	2	3	2	3	3	2	2	3	2	3	3	2.57143	1	1	1	1	4	4	4	4	2	4	4	4	4	4	3.8	4	4	4	4	4	4	4	4	4	4.16667
2	2	3	4	3	1	1	1	1	1	1	1	1	1	1	1	1.5625	2	2	1	1	1	1	1	1.28571	1	1	3	1.66667	2	5	5	3	4	5	3	3	2	5	3.7	5	3	5	5	5	4.6	1	1	3	2.83333
4	3	4	4	5	5	4	3	4	4	4	3	4	4	3	4	3.875	3	3	5	4	4	4	4	3.85714	4	5	5	4.66667	3	4	5	3	4	4	4	3	3	4	3.7	4	4	5	4	4	4.2	4	4	4	2.83333
4	4	4	4	4	4	4	5	4	4	4	4	4	4	4	4	4.0625	4	4	4	3	3	4	4	3.71429	4	4	4	4	4	4	4	5	4	4	4	4	4	4	4.1	4	4	4	4	4	4	4	4	4	4
5	4	4	4	5	5	5	5	4	4	4	4	4	4	4	4	4.3125	4	4	5	4	4	5	5	4.42857	5	5	5	5	5	5	4	4	5	5	5	4	4	4	4.5	5	5	5	5	5	5	4	4	4	4
2	4	3	4	5	5	5	4	5	4	5	4	4	5	4	4	4.1875	4	5	5	5	5	5	4	4.71429	5	5	5	5	5	5	5	5	5	5	4	4	5	5	4.8	5	5	5	5	5	5	5	5	5	4.5
5	5	4	5	3	5	3	5	5	5	4	4	5	5	3	4	4.375	3	4	3	4	5	5	5	4.14286	5	5	3	4.33333	4	5	4	5	5	5	5	5	5	5	4.8	5	3	5	5	4	4.4	3	4	4	4.33333
4	4	4	4	4	4	4	4	4	4	4	4	4	3	3	3	3.8125	3	3	3	3	3	3	3	3	3	3	4	3.33333	4	4	4	4	4	4	4	4	4	4	4	4	4	4	4	4	4	4	4	4	3.83333
5	5	5	5	5	5	5	5	5	5	5	5	5	5	5	5	5	5	5	5	5	5	5	5	5	5	4	5	4.66667	4	5	5	5	5	5	5	4	5	5	4.8	5	5	5	5	5	5	5	5	5	4.5
5	5	5	5	5	5	5	5	5	4	5	5	5	4	4	4	4.75	4	4	5	5	4	4	4	4.28571	4	4	4	4	5	5	5	5	5	4	5	4	5	5	4.8	5	5	5	5	5	5	4	4	3	4.33333
5	3	4	4	4	4	5	4	4	4	4	4	4	4	4	4	4.0625	4	5	4	5	5	4	4	4.42857	4	1	5	3.33333	5	3	5	4	4	4	4	4	4	4	4.1	4	4	5	4	4	4.2	4	4	4	3.83333
5	5	5	5	5	5	5	5	5	5	5	5	5	5	5	5	5	5	5	5	5	5	5	5	5	5	4	5	4.66667	5	5	5	5	5	5	5	5	5	5	5	5	5	5	5	5	5	5	5	5	4.5
5	5	5	5	5	5	5	3	5	3	3	5	4	3	4	4	4.3125	3	3	4	3	4	4	4	3.57143	4	4	4	4	4	4	4	4	4	3	4	4	4	4	3.9	4	4	4	4	4	4	4	4	4	4.5
4	4	4	4	4	4	4	4	4	3	4	4	4	3	3	4	3.8125	2	2	4	4	4	4	4	3.42857	4	4	4	4	4	4	4	4	4	4	4	4	3	4	3.9	3	4	4	4	4	3.8	2	3	4	3.5
4	4	4	5	3	4	5	5	5	3	3	5	3	3	3	3	3.875	3	3	2	5	5	5	5	4	3	5	3	3.66667	2	3	3	3	5	3	3	3	5	5	3.5	5	5	5	5	5	5	3	3	3	3
4	4	4	5	5	5	5	4	5	4	4	4	4	4	4	4	4.3125	2	2	4	4	4	4	4	3.42857	2	4	4	3.33333	4	5	4	4	4	4	4	4	4	4	4.1	4	4	2	4	3	3.4	4	5	4	3.66667
5	3	3	3	4	4	4	3	4	5	4	4	4	4	4	4	3.875	5	5	5	5	5	5	5	5	4	4	5	4.33333	5	5	5	5	5	5	5	5	5	5	5	4	4	5	4	5	4.4	5	5	5	4.66667
5	5	5	5	5	5	5	4	5	5	5	5	5	5	5	5	4.9375	5	5	5	5	5	5	5	5	5	5	5	5	5	5	5	5	5	5	5	5	5	5	5	5	5	5	5	5	5	5	5	5	5
5	5	4	5	4	5	4	4	4	4	4	4	4	5	4	4	4.3125	4	4	4	4	4	4	4	4	4	3	4	3.66667	4	4	4	4	5	4	4	4	4	4	4.1	4	4	4	4	5	4.2	4	4	4	4.5
5	5	5	5	4	4	5	5	5	4	4	4	4	4	4	4	4.4375	5	5	4	4	4	4	4	4.28571	5	4	5	4.66667	5	5	5	5	5	5	4	4	5	5	4.8	5	5	5	5	5	5	5	4	4	4.16667
4	4	4	4	4	4	4	4	4	4	4	4	4	4	4	4	4	4	4	4	4	4	4	4	4	4	4	4	4	4	4	4	4	4	4	4	4	4	4	4	4	4	4	4	4	4	4	4	4	4.16667
5	5	5	5	5	5	5	5	5	5	5	5	5	5	5	5	5	5	5	5	5	5	5	5	5	5	5	5	5	5	4	5	3	5	5	5	5	5	5	4.7	5	5	5	5	5	5	5	5	5	4.5
4	4	4	4	4	3	4	4	4	4	4	4	4	4	5	4	4	5	5	5	5	5	5	5	5	5	5	5	5	5	5	5	5	4	4	5	5	5	5	4.8	5	5	5	5	5	5	5	5	5	5
5	5	5	5	5	5	5	5	5	5	5	5	5	5	5	5	5	5	5	5	5	5	5	5	5	5	5	5	5	5	5	5	5	5	5	5	5	5	5	5	5	5	5	5	5	5	5	5	5	5
4	4	4	4	4	4	4	4	4	4	4	4	3	5	5	4	4.0625	4	3	4	4	4	3	4	3.71429	3	3	3	3	4	4	4	4	4	4	4	4	4	4	4	3	4	4	4	4	3.8	3	4	3	4.16667
5	5	5	5	4	4	4	5	4	5	4	4	5	4	4	4	4.4375	4	4	4	4	5	5	5	4.42857	5	4	5	4.66667	5	4	5	4	4	5	4	4	3	4	4.2	5	4	5	5	5	4.8	3	3	3	3.16667
4	4	4	5	4	4	4	4	5	5	4	4	4	4	4	4	4.1875	5	5	5	4	4	4	4	4.42857	4	4	4	4	4	4	4	4	4	4	4	4	5	4	4.1	4	4	4	4	5	4.2	5	5	4	3.83333
5	4	5	4	4	4	5	5	4	4	4	4	5	4	4	4	4.3125	4	5	4	5	4	4	5	4.42857	4	5	4	4.33333	4	5	4	5	4	5	3	4	4	4	4.2	4	4	4	4	4	4	4	4	4	4.33333
3	5	5	4	4	4	4	3	5	4	4	4	4	3	4	4	4	4	4	3	4	4	3	4	3.71429	4	4	5	4.33333	4	4	5	5	5	4	4	4	4	5	4.4	4	4	4	5	4	4.2	5	4	4	4.16667
3	5	5	4	4	4	4	3	5	4	4	4	4	3	4	4	4	4	4	3	4	4	3	4	3.71429	4	4	5	4.33333	4	4	5	5	5	4	4	4	4	5	4.4	4	4	4	5	4	4.2	5	4	4	4.33333
5	5	5	5	5	5	5	4	5	4	4	4	4	5	5	5	4.6875	4	4	4	4	4	4	4	4	5	5	5	5	5	5	5	5	4	4	4	5	4	5	4.6	5	5	5	5	5	5	5	5	5	4.66667
5	5	5	5	5	5	5	3	4	4	3	4	5	5	3	4	4.375	4	4	4	4	4	4	4	4	4	4	4	4	4	4	3	4	4	4	3	4	4	4	3.8	4	4	4	4	4	4	4	3	3	4.16667
5	5	5	5	5	5	5	4	5	4	4	4	4	5	4	4	4.5625	3	3	4	4	3	4	4	3.57143	4	4	4	4	3	5	5	3	4	3	4	3	4	4	3.8	4	4	4	5	5	4.4	3	3	3	3.16667
5	4	5	4	5	5	5	5	5	5	5	5	5	5	5	5	4.875	4	4	4	4	4	4	4	4	4	4	4	4	5	5	5	5	5	5	4	3	4	3	4.4	4	4	4	4	4	4	4	4	4	3.5
5	4	4	5	4	5	5	4	5	5	4	4	4	5	4	4	4.4375	4	4	4	5	4	4	4	4.14286	4	4	4	4	4	4	4	4	4	4	5	4	4	4	4.1	4	4	4	4	5	4.2	4	5	5	4.33333
3	2	2	3	3	3	2	3	4	3	3	3	3	2	2	3	2.75	2	3	3	3	3	3	3	2.85714	2	3	3	2.66667	2	3	2	2	4	2	3	2	3	3	2.6	2	2	2	2	2	2	2	3	3	3.66667
4	5	4	5	4	4	4	4	4	3	3	3	3	3	3	3	3.6875	5	5	5	3	3	3	3	3.85714	5	5	4	4.66667	3	4	4	4	4	4	4	3	4	4	3.8	4	4	3	3	3	3.4	4	4	4	3.33333
3	2	2	2	2	2	2	3	3	3	1	1	1	1	1	1	1.875	4	3	2	1	1	2	1	2	5	5	1	3.66667	1	2	1	2	3	1	2	1	2	3	1.8	2	2	2	2	2	2	2	3	3	3.33333
5	5	5	5	5	5	5	5	5	5	5	5	5	5	5	5	5	5	5	5	5	5	5	5	5	5	5	5	5	5	5	5	5	5	5	5	5	5	5	5	5	5	5	5	4	4.8	5	5	5	3.83333
5	4	5	5	5	5	5	5	5	5	5	5	5	5	5	5	4.9375	5	4	4	5	5	5	4	4.57143	5	5	5	5	5	5	5	5	5	5	5	4	5	5	4.9	5	5	4	5	5	4.8	5	4	5	4.83333
5	3	2	4	4	4	5	4	5	3	3	3	3	3	3	4	3.625	3	4	4	3	5	5	5	4.14286	2	5	5	4	4	2	4	2	2	2	2	2	2	4	2.6	2	2	4	2	2	2.4	2	4	4	4
4	2	2	4	4	4	2	2	4	2	2	4	2	4	2	2	2.875	4	2	4	4	2	3	2	3	2	2	3	2.33333	2	4	2	2	4	2	4	2	2	4	2.8	3	2	4	3	2	2.8	2	2	3	2.83333
4	3	4	4	4	4	3	4	3	3	3	4	3	3	3	3	3.4375	5	5	4	3	4	3	3	3.85714	3	5	4	4	3	4	3	3	5	3	4	2	4	4	3.5	4	3	5	4	4	4	3	5	4	3.16667
5	5	4	4	4	4	4	3	4	4	4	4	4	3	3	3	3.875	4	4	4	4	4	4	4	4	3	4	4	3.66667	4	4	4	3	5	4	4	4	4	4	4	4	4	4	4	3	3.8	3	4	4	3.83333
5	5	4	4	3	5	3	4	4	5	3	3	3	4	4	4	3.9375	3	3	3	3	3	3	3	3	2	2	2	2	3	5	4	4	5	4	3	3	5	4	4	3	3	3	3	3	3	3	3	3	3.33333
5	5	5	5	5	5	5	4	5	5	5	5	5	5	5	5	4.9375	5	5	5	5	5	5	5	5	2	2	2	2	2	3	4	4	3	3	3	3	3	3	3.1	5	5	5	5	5	5	5	3	3	3.33333
5	5	5	4	4	3	4	4	4	4	4	4	4	5	4	4	4.1875	3	3	4	4	3	4	4	3.57143	5	5	5	5	5	4	4	4	4	4	5	4	3	4	4.1	4	4	3	3	3	3.4	3	3	3	3.33333
3	3	3	5	5	4	4	5	5	3	3	5	3	3	3	3	3.75	1	1	5	3	1	1	4	2.28571	4	5	4	4.33333	3	1	3	4	4	4	4	4	5	3	3.5	3	4	5	3	4	3.8	4	4	4	3.5
4	5	4	5	4	4	4	4	4	4	3	3	4	4	4	4	4	3	4	4	4	4	4	4	3.85714	4	5	5	4.66667	3	5	4	3	4	4	4	3	3	4	3.7	4	3	5	4	3	3.8	4	3	3	3.66667
5	5	5	5	4	5	5	4	5	4	5	5	5	4	4	4	4.625	3	3	5	3	4	3	4	3.57143	4	4	4	4	4	4	4	4	4	4	4	4	4	4	4	4	4	4	4	4	4	4	4	4	3.66667
3	4	4	4	4	4	4	4	4	4	4	4	4	4	4	4	3.9375	4	4	4	4	4	4	4	4	4	4	4	4	4	4	4	4	4	4	4	4	4	4	4	4	4	4	4	4	4	4	4	4	4
5	5	5	5	5	5	5	5	5	5	5	5	5	5	5	5	5	5	5	5	5	5	5	5	5	5	5	5	5	4	5	5	5	5	5	5	5	5	5	4.9	5	5	5	5	5	5	5	5	5	4.5
4	3	4	3	4	3	3	3	3	3	3	3	4	4	3	3	3.3125	3	3	3	3	3	3	3	3	4	3	4	3.66667	3	4	4	3	3	3	3	3	3	3	3.2	4	3	4	3	4	3.6	3	3	3	4
5	3	3	4	4	4	5	2	3	4	4	4	3	4	3	3	3.625	4	3	4	3	4	3	4	3.57143	4	2	4	3.33333	4	4	4	4	2	2	4	2	2	2	3	2	3	2	3	1	2.2	4	3	2	3
4	4	4	4	4	4	4	4	4	3	3	3	3	3	3	3	3.5625	3	3	4	3	3	3	4	3.28571	4	4	4	4	3	3	3	4	4	4	4	4	4	4	3.7	4	3	4	4	4	3.8	3	3	3	3
4	4	4	5	5	4	4	5	4	5	5	3	4	4	3	3	4.125	2	2	3	3	3	3	3	2.71429	5	5	5	5	3	4	3	2	4	4	3	2	2	4	3.1	3	3	5	3	3	3.4	4	3	2	3
4	3	3	3	3	3	3	4	3	3	4	3	3	3	3	3	3.1875	3	3	2	3	2	3	3	2.71429	3	3	3	3	3	4	4	4	4	4	3	4	3	4	3.7	3	3	3	4	3	3.2	4	3	3	3.16667
4	4	4	4	4	4	4	3	4	4	4	4	4	4	3	4	3.875	4	4	4	3	4	4	4	3.85714	4	4	4	4	4	3	3	4	4	3	4	3	4	3	3.5	4	3	4	4	4	3.8	4	3	4	3.5
4	4	4	4	4	4	4	4	4	4	4	4	4	4	4	4	4	4	4	4	4	4	4	4	4	3	3	4	3.33333	4	4	4	4	4	4	4	4	4	4	4	4	4	4	4	4	4	3	4	4	3.66667
5	5	5	5	5	5	5	4	5	5	5	5	5	5	5	5	4.9375	4	4	5	4	5	5	5	4.57143	4	4	4	4	4	5	5	5	5	5	5	4	5	5	4.8	4	4	4	4	5	4.2	4	4	4	3.83333
5	5	5	5	5	5	5	5	5	5	5	5	5	5	5	5	5	5	5	5	2	5	5	5	4.57143	5	2	5	4	4	5	5	5	5	5	5	5	5	5	4.9	1	5	5	5	5	4.2	5	5	2	4
5	4	4	5	5	5	5	4	5	3	4	4	4	4	5	4	4.375	4	4	5	5	5	4	5	4.57143	4	4	5	4.33333	4	5	5	4	4	5	5	5	5	5	4.7	5	4	4	4	4	4.2	5	4	5	4.33333
4	4	3	4	3	4	4	3	3	4	3	4	3	3	3	3	3.4375	3	3	4	3	3	3	3	3.14286	4	4	3	3.66667	4	5	5	4	4	4	3	3	4	4	4	3	4	4	4	5	4	4	4	4	4.33333
3	3	3	5	4	4	4	3	4	3	3	3	3	3	3	3	3.375	4	3	4	4	4	4	4	3.85714	5	4	4	4.33333	4	3	5	4	5	3	4	3	5	4	4	4	3	4	4	4	3.8	4	5	4	4.16667
5	5	5	5	5	5	4	5	5	5	4	5	5	5	5	5	4.875	5	4	5	5	5	5	5	4.85714	5	3	4	4	5	5	5	5	5	5	5	5	4	5	4.9	5	4	5	5	5	4.8	5	5	5	4.66667
5	5	5	4	3	3	4	5	4	4	5	5	5	5	5	4	4.4375	3	3	5	4	4	3	3	3.57143	3	5	5	4.33333	3	3	3	5	3	3	4	3	5	3	3.5	4	3	3	5	3	3.6	3	4	4	4.33333
3	2	2	2	2	2	3	2	3	2	3	2	2	2	2	2	2.25	3	2	2	2	2	2	2	2.14286	2	2	3	2.33333	2	4	2	3	4	3	3	2	2	2	2.7	3	3	2	3	2	2.6	2	2	2	2.83333
4	4	4	4	4	4	4	4	4	3	3	3	3	3	3	3	3.5625	4	3	4	3	3	3	3	3.28571	1	4	3	2.66667	3	4	2	3	4	3	4	2	3	3	3.1	2	2	2	2	2	2	3	2	2	2.16667
5	5	5	5	4	5	4	3	5	2	3	3	4	4	3	3	3.9375	4	4	5	4	4	4	4	4.14286	4	4	5	4.33333	4	5	5	5	5	5	5	5	5	5	4.9	4	4	4	4	5	4.2	3	4	4	3
3	3	3	3	3	3	3	3	3	3	3	3	3	3	3	3	3	4	3	3	3	3	3	3	3.14286	3	4	3	3.33333	3	3	3	3	3	3	3	3	4	3	3.1	3	4	3	3	3	3.2	4	4	4	3.83333
4	4	4	4	3	4	3	3	3	3	2	2	2	2	2	2	2.9375	3	4	3	3	3	3	3	3.14286	4	4	4	4	3	4	4	4	5	4	4	1	5	5	3.9	5	5	5	4	4	4.6	3	3	4	3.66667
5	4	4	4	4	3	3	3	4	4	4	3	3	4	3	4	3.6875	4	4	4	4	4	4	4	4	4	4	4	4	3	4	4	4	4	4	4	3	4	4	3.8	3	3	4	4	4	3.6	4	4	3	3.5
4	4	5	5	4	4	4	5	5	5	4	4	4	4	4	4	4.3125	4	5	4	4	4	4	4	4.14286	4	3	4	3.66667	4	4	3	4	3	4	4	3	3	4	3.6	3	4	4	4	4	3.8	4	5	5	4.16667
4	4	4	5	5	5	5	3	4	3	2	2	3	3	1	3	3.5	4	3	4	4	5	5	5	4.28571	2	2	3	2.33333	4	4	4	5	5	4	3	3	3	3	3.8	2	3	4	4	4	3.4	2	3	3	3.66667
4	3	4	4	4	4	4	4	4	4	4	4	4	3	3	3	3.75	4	4	4	4	4	4	4	4	5	3	5	4.33333	4	4	4	4	4	4	4	4	4	4	4	4	4	4	4	4	4	3	3	4	3
5	5	5	5	3	4	4	5	5	4	4	4	4	4	4	4	4.3125	3	3	4	4	4	4	4	3.71429	3	4	4	3.66667	4	5	4	5	5	4	5	5	5	5	4.7	4	4	5	5	5	4.6	4	4	3	3.5
4	5	5	5	4	4	4	4	4	4	4	4	4	4	4	4	4.1875	4	4	4	4	4	4	4	4	4	4	4	4	3	5	3	3	4	3	4	3	3	3	3.4	4	4	5	5	5	4.6	3	4	4	3.66667
4	4	4	4	4	4	4	3	4	3	3	3	3	3	4	3	3.5625	4	4	4	3	4	5	5	4.14286	5	5	5	5	3	4	3	4	4	4	4	3	4	4	3.7	4	4	3	3	4	3.6	3	4	4	3.66667
5	5	5	5	5	5	5	4	4	4	4	5	4	4	5	5	4.625	5	5	4	4	4	4	4	4.28571	4	3	3	3.33333	5	3	3	4	4	4	4	4	3	4	3.8	4	4	4	3	3	3.6	3	3	3	3.33333
4	4	4	4	3	2	3	4	4	3	3	3	2	3	3	3	3.25	2	2	3	4	4	3	4	3.14286	2	3	4	3	4	3	3	2	3	3	4	2	2	4	3	3	3	4	4	4	3.6	2	2	3	2.66667
4	5	3	4	4	3	3	2	3	3	3	3	3	3	2	2	3.125	3	3	4	4	4	4	4	3.71429	2	3	3	2.66667	2	3	3	4	3	4	3	3	3	3	3.1	3	3	3	3	3	3	3	3	3	2.66667
4	4	3	4	3	4	4	5	4	4	4	3	4	4	4	4	3.875	3	3	4	3	4	4	4	3.57143	3	3	3	3	4	4	4	4	5	4	4	3	4	4	4	4	4	4	4	4	4	4	4	4	3.5
4	4	4	4	3	3	4	4	3	4	4	4	3	3	3	3	3.5625	3	3	3	4	3	3	4	3.28571	2	2	3	2.33333	4	4	4	3	3	3	3	4	3	3	3.4	4	4	5	4	3	4	2	2	2	3
5	4	4	5	4	5	3	3	5	4	3	4	4	3	3	3	3.875	4	4	4	3	4	4	4	3.85714	3	3	4	3.33333	3	5	5	5	5	5	4	3	5	5	4.5	5	4	5	5	4	4.6	4	4	4	3
5	5	5	5	5	5	4	5	5	5	4	4	4	5	4	4	4.625	5	5	5	5	5	5	5	5	5	3	5	4.33333	4	5	4	5	5	5	5	5	5	5	4.8	5	5	5	5	5	5	2	3	3	3.33333
5	5	4	5	3	4	4	5	5	5	4	5	4	5	5	5	4.5625	5	4	5	5	5	4	5	4.71429	5	5	5	5	5	5	5	5	5	5	5	4	4	4	4.7	3	4	3	4	3	3.4	5	5	5	3.83333
5	5	5	5	5	5	5	5	5	5	5	5	5	5	5	5	5	5	5	5	5	5	5	5	5	5	5	5	5	5	5	5	5	5	5	5	4	5	5	4.9	5	5	5	5	5	5	4	5	4	4.66667
5	5	5	5	5	5	5	5	5	5	5	4	4	4	4	5	4.75	5	5	3	4	3	3	3	3.71429	5	5	5	5	3	5	5	4	5	4	5	3	5	5	4.4	4	5	4	4	4	4.2	4	4	5	4.33333
4	4	4	4	4	5	4	3	4	4	4	5	4	4	4	4	4.0625	4	4	3	4	4	4	4	3.85714	4	4	4	4	3	4	3	2	3	4	4	3	4	3	3.3	4	3	4	3	3	3.4	3	4	4	4
4	4	5	4	4	5	4	4	4	5	4	4	5	4	5	4	4.3125	4	3	4	4	4	3	4	3.71429	4	2	4	3.33333	3	4	2	2	4	4	4	3	4	3	3.3	4	2	2	4	3	3	2	2	2	2.83333
4	4	3	4	4	5	4	5	4	4	4	4	5	4	4	3	4.0625	4	5	4	4	5	4	4	4.28571	5	4	5	4.66667	4	4	5	4	4	5	4	3	5	4	4.2	4	5	4	3	4	4	4	5	4	3.16667
4	4	3	4	4	3	4	4	3	4	5	5	4	5	4	4	4	5	4	3	4	5	5	4	4.28571	4	4	5	4.33333	5	4	4	5	5	4	5	4	4	4	4.4	5	4	4	5	5	4.6	5	4	5	4.5
4	3	4	4	3	4	4	4	4	3	4	4	4	3	4	4	3.75	4	4	3	4	4	4	3	3.71429	4	4	5	4.33333	2	2	4	2	2	2	4	4	4	4	3	3	4	4	4	3	3.6	4	4	4	4.33333
4	4	5	4	4	3	4	5	4	4	3	4	4	4	3	4	3.9375	5	4	4	4	4	4	3	4	4	4	4	4	4	5	4	4	5	4	4	4	5	5	4.4	4	4	4	4	3	3.8	4	5	4	4.16667
4	4	5	4	4	3	4	4	5	5	4	4	4	5	4	4	4.1875	4	5	4	5	5	4	4	4.42857	5	4	4	4.33333	4	5	4	4	4	5	4	3	3	2	3.8	2	3	2	4	4	3	2	2	4	3.5
4	4	4	5	4	5	4	4	3	4	5	4	4	5	4	4	4.1875	4	3	4	5	4	4	5	4.14286	4	4	4	4	2	2	3	4	2	4	4	2	4	2	2.9	2	3	4	4	2	3	3	4	4	3.16667
4	4	4	5	4	5	4	4	5	4	4	5	4	5	4	4	4.3125	4	4	5	4	4	5	4	4.28571	4	5	4	4.33333	4	5	4	4	5	4	4	4	4	5	4.3	4	4	4	3	4	3.8	4	4	5	4
4	3	4	4	4	5	4	4	5	4	4	3	4	4	5	4	4.0625	4	4	3	4	5	4	4	4	4	5	4	4.33333	4	3	4	4	4	4	4	3	5	4	3.9	4	4	5	4	4	4.2	5	4	4	4.33333
4	4	5	4	4	4	5	4	5	4	4	5	4	4	4	4	4.25	5	4	4	5	4	4	5	4.42857	4	4	4	4	3	2	3	4	2	3	4	4	2	3	3	4	4	3	2	4	3.4	4	3	2	3.66667
4	4	4	4	5	4	4	4	3	4	5	4	5	4	4	4	4.125	5	4	4	5	4	4	5	4.42857	4	4	5	4.33333	5	4	4	5	5	4	4	4	5	4	4.4	4	5	4	5	4	4.4	4	5	4	3.66667
4	4	4	5	4	3	4	4	5	4	4	4	5	4	3	4	4.0625	4	5	4	3	4	4	4	4	5	4	4	4.33333	4	3	4	4	3	4	4	4	4	4	3.8	5	3	4	4	5	4.2	4	5	4	4.33333
4	3	4	4	4	5	4	4	4	5	4	5	4	4	4	4	4.125	4	5	4	5	4	5	4	4.42857	3	4	4	3.66667	5	4	4	5	4	5	4	3	4	4	4.2	3	2	2	4	2	2.6	4	3	4	4
4	3	4	4	5	4	4	4	4	3	4	4	5	4	4	5	4.0625	4	4	3	4	4	4	4	3.85714	5	4	4	4.33333	2	3	2	4	3	4	4	2	3	4	3.1	4	4	3	4	4	3.8	4	3	2	3.33333
4	5	4	4	5	4	5	5	4	5	4	5	5	4	5	4	4.5	4	5	5	4	3	4	4	4.14286	4	5	4	4.33333	4	5	4	4	5	4	4	4	4	3	4.1	4	5	4	3	4	4	4	5	5	3.83333
4	4	3	4	5	4	4	5	5	4	4	5	4	4	4	4	4.1875	4	5	3	4	5	4	5	4.28571	5	4	5	4.66667	5	4	4	5	5	4	4	4	4	2	4.1	5	4	5	4	4	4.4	2	3	4	3.83333
4	3	4	4	5	5	4	4	5	4	4	4	5	5	4	4	4.25	4	5	5	4	5	4	4	4.42857	3	4	4	3.66667	4	2	3	2	3	4	4	4	5	4	3.5	4	3	3	4	4	3.6	2	4	4	3.16667
4	4	4	4	5	4	5	5	4	4	5	4	3	5	4	4	4.25	5	4	4	5	4	4	4	4.28571	4	5	4	4.33333	4	3	4	5	4	4	5	4	4	4	4.1	4	5	4	4	3	4	4	5	4	3.83333
4	5	4	4	4	4	5	4	4	4	5	5	4	4	5	5	4.375	4	4	4	3	4	4	5	4	3	4	4	3.66667	4	5	3	4	4	4	4	4	4	5	4.1	4	5	3	4	4	4	4	4	4	4.16667
5	4	5	4	3	3	4	4	5	5	3	4	4	5	5	4	4.1875	4	5	5	4	5	4	5	4.57143	4	4	4	4	4	5	5	4	5	4	4	4	3	5	4.3	5	4	5	4	4	4.4	4	3	3	3.66667
4	5	5	5	5	5	5	5	5	4	4	4	5	5	4	4	4.625	4	4	4	4	4	5	4	4.14286	3	3	4	3.33333	4	5	5	5	4	4	4	5	4	5	4.5	5	5	4	4	4	4.4	4	4	4	3.66667
4	5	4	3	4	4	5	4	3	5	5	3	4	5	3	4	4.0625	4	3	3	5	5	3	4	3.85714	5	4	3	4	3	4	3	4	4	3	4	3	4	3	3.5	5	5	4	3	3	4	4	5	5	4.33333
5	4	4	4	4	4	5	4	4	4	5	5	4	4	5	4	4.3125	4	4	4	5	5	4	5	4.42857	4	4	4	4	4	4	3	4	4	4	5	4	4	4	4	4	4	4	4	4	4	4	4	3	4.16667
4	5	5	5	4	3	4	5	4	3	4	4	5	3	4	3	4.0625	5	4	4	3	5	3	4	4	4	3	5	4	5	4	4	3	3	4	4	4	5	3	3.9	4	4	5	5	4	4.4	4	3	5	3.83333
4	4	4	4	4	4	4	4	4	4	4	4	5	5	5	4	4.1875	4	4	4	4	4	5	4	4.14286	4	3	4	3.66667	4	5	4	4	4	4	5	4	4	4	4.2	4	4	4	4	3	3.8	4	4	4	4
4	4	4	3	5	5	5	4	4	5	4	4	3	5	3	4	4.125	4	4	5	5	4	4	3	4.14286	4	4	5	4.33333	4	4	5	5	3	4	5	5	5	4	4.4	5	4	3	5	5	4.4	4	4	4	4
4	4	5	4	4	4	4	5	5	5	4	4	4	4	4	4	4.25	4	4	4	4	4	4	4	4	4	5	4	4.33333	4	5	5	4	4	4	4	4	4	4	4.2	5	4	4	4	5	4.4	4	3	3	3.66667
5	5	5	5	5	5	5	4	4	5	4	4	4	3	4	4	4.4375	4	4	4	4	3	4	4	3.85714	4	5	4	4.33333	3	4	4	4	4	4	4	4	4	4	3.9	4	5	4	4	5	4.4	4	4	5	3.83333
4	4	3	4	5	4	4	5	4	4	5	5	3	4	4	3	4.0625	4	4	3	5	3	4	5	4	3	4	4	3.66667	5	5	4	4	4	5	5	3	4	3	4.2	5	4	4	5	4	4.4	5	4	5	4.5
5	4	4	4	4	4	4	5	4	4	4	4	4	4	4	5	4.1875	5	5	5	4	4	4	4	4.42857	4	4	4	4	5	4	4	4	4	4	4	4	5	4	4.2	4	4	4	4	4	4	5	4	4	4.5
5	4	4	5	3	4	4	4	5	5	4	4	3	5	4	3	4.125	5	4	3	4	3	5	4	4	3	3	4	3.33333	4	3	5	3	4	4	4	3	4	3	3.7	4	3	5	3	4	3.8	4	3	5	4.16667
4	3	4	4	5	5	4	4	4	4	4	4	4	4	4	5	4.125	4	4	5	4	4	4	4	4.14286	4	4	3	3.66667	4	4	4	4	4	3	4	4	5	4	4	4	4	4	4	3	3.8	4	4	4	4
5	4	4	4	5	4	4	4	4	4	4	4	4	4	4	4	4.125	4	4	5	5	4	4	4	4.28571	3	4	3	3.33333	4	4	4	4	5	4	4	4	4	4	4.1	4	4	4	4	4	4	4	3	4	3.83333
5	4	3	5	4	4	3	4	5	4	5	3	4	4	5	4	4.125	4	4	4	3	5	3	3	3.71429	4	5	5	4.66667	3	4	4	4	4	5	4	3	3	5	3.9	5	4	3	4	5	4.2	3	3	5	3.66667
5	4	4	4	4	4	4	5	5	5	4	4	4	4	4	4	4.25	5	5	4	4	4	4	5	4.42857	5	4	3	4	4	4	4	4	4	4	4	4	4	4	4	4	5	5	5	5	4.8	4	4	4	3.83333
4	4	5	4	4	4	4	4	4	4	4	4	5	4	4	4	4.125	4	4	3	4	4	4	4	3.85714	3	3	3	3	4	4	4	4	5	5	4	4	3	4	4.1	4	4	4	3	4	3.8	4	4	3	3.83333
4	4	4	5	4	4	4	5	5	4	4	4	5	4	4	4	4.25	4	3	4	4	4	5	4	4	3	4	3	3.33333	4	4	3	4	5	5	4	4	4	4	4.1	4	4	3	4	4	3.8	4	4	4	3.83333
5	4	5	4	4	4	4	4	4	4	5	4	4	4	4	4	4.1875	4	4	5	4	4	4	4	4.14286	3	3	3	3	4	3	4	5	5	4	5	4	3	4	4.1	4	4	4	4	4	4	4	4	4	4
5	4	4	4	4	5	5	5	5	4	4	4	4	4	4	4	4.3125	4	4	4	5	5	4	4	4.28571	3	3	4	3.33333	4	4	4	4	4	4	4	5	3	4	4	4	4	3	4	4	3.8	4	4	4	4
4	5	5	5	4	4	4	5	4	4	4	4	4	5	5	5	4.4375	4	4	4	5	4	4	4	4.14286	3	3	4	3.33333	5	4	4	5	4	4	4	4	4	4	4.2	4	4	4	4	4	4	4	4	4	4
5	4	4	5	4	4	5	5	5	5	4	4	4	4	4	4	4.375	4	4	4	5	4	4	4	4.14286	3	3	4	3.33333	4	5	5	5	5	5	4	5	5	4	4.7	4	4	3	4	4	3.8	4	4	3	3.83333
5	4	5	5	5	5	5	5	5	5	4	4	4	4	4	4	4.5625	4	4	4	4	4	4	4	4	3	4	4	3.66667	4	4	4	5	5	5	4	4	5	5	4.5	4	5	4	4	4	4.2	4	4	4	3.83333
5	4	5	5	5	4	4	5	5	5	4	4	4	5	4	4	4.5	4	4	4	4	4	4	4	4	3	3	3	3	4	5	5	5	5	5	5	5	4	4	4.7	4	4	4	4	4	4	4	4	4	4
4	5	3	4	4	3	5	3	4	4	5	4	4	5	3	3	3.9375	4	5	4	5	3	3	4	4	5	4	4	4.33333	5	4	4	3	5	3	5	3	4	5	4.1	3	5	4	3	5	4	4	5	3	4
5	5	5	5	5	5	5	5	4	4	4	4	4	4	4	4	4.5	4	5	4	4	4	5	5	4.42857	4	4	5	4.33333	4	4	5	5	5	5	4	4	4	4	4.4	4	4	4	4	4	4	4	4	4	4
4	5	3	4	4	5	4	4	5	4	5	4	4	3	5	5	4.25	3	4	5	4	3	3	4	3.71429	4	5	5	4.66667	4	3	3	5	5	4	4	5	4	4	4.1	3	4	5	3	5	4	4	4	5	4.16667
5	5	5	5	5	5	5	5	5	4	4	4	5	4	4	4	4.625	4	4	5	5	5	5	5	4.71429	4	4	4	4	3	4	4	4	4	4	3	2	4	4	3.6	4	4	3	4	4	3.8	4	3	4	4
5	5	5	5	5	5	5	4	4	4	5	4	4	4	4	4	4.5	4	4	5	5	5	4	4	4.42857	3	3	3	3	3	4	4	4	5	4	4	4	4	4	4	4	5	3	4	4	4	4	4	3	3.66667
5	3	5	4	3	4	3	5	5	4	4	3	3	4	5	4	4	4	3	5	4	3	4	5	4	4	5	3	4	3	4	5	3	4	5	3	5	5	4	4.1	4	3	5	3	4	3.8	5	3	4	3.83333
5	4	3	4	5	4	4	3	4	3	4	4	4	5	5	3	4	4	3	5	4	3	4	5	4	3	4	5	4	5	4	3	4	4	5	4	5	4	3	4.1	4	5	4	5	4	4.4	3	3	4	3.66667
5	5	5	4	4	3	4	3	4	5	4	4	3	5	3	4	4.0625	3	3	4	4	4	4	5	3.85714	3	4	5	4	4	5	4	5	4	5	4	4	3	4	4.2	4	5	5	4	5	4.6	4	5	5	4
4	5	5	4	5	4	5	4	5	5	4	4	5	5	4	4	4.5	5	4	5	4	5	4	5	4.57143	4	4	5	4.33333	4	5	4	3	4	5	5	5	4	4	4.3	5	4	4	5	4	4.4	4	3	4	4.16667
5	5	4	5	4	4	4	4	4	5	5	5	4	5	5	5	4.5625	5	5	4	5	5	5	4	4.71429	4	5	5	4.66667	4	4	4	4	4	4	4	4	4	4	4	4	4	3	4	5	4	4	4	4	3.83333
5	5	5	5	4	5	4	5	5	4	4	4	5	4	4	4	4.5	3	4	4	4	5	5	5	4.28571	4	4	4	4	4	5	5	5	5	5	4	4	3	4	4.4	4	4	3	4	4	3.8	4	4	3	3.83333
5	5	5	4	5	5	5	5	5	5	4	4	4	4	4	4	4.5625	3	4	5	5	5	5	5	4.57143	3	4	4	3.66667	3	4	4	4	4	4	4	5	5	4	4.1	4	4	4	4	4	4	4	3	3	3.5
5	5	4	5	5	4	5	5	5	4	5	5	5	5	5	5	4.8125	4	4	4	4	4	4	5	4.14286	3	4	4	3.66667	3	4	4	4	5	4	4	4	5	4	4.1	4	4	4	4	4	4	4	4	4	3.66667
5	5	5	4	5	4	5	5	5	4	5	5	5	5	5	5	4.8125	5	4	4	4	5	5	5	4.57143	5	5	5	5	5	5	4	5	5	5	5	5	4	5	4.8	5	4	5	5	5	4.8	4	4	5	4.16667
5	5	5	4	4	5	4	5	4	5	5	5	4	5	4	5	4.625	5	4	5	5	5	4	5	4.71429	5	5	5	5	4	5	5	5	5	4	5	5	4	5	4.7	5	5	5	4	5	4.8	5	5	4	4.5
5	5	5	5	5	4	5	5	5	5	5	4	5	5	5	5	4.875	5	5	5	4	5	5	5	4.85714	5	5	4	4.66667	5	5	4	5	5	5	5	5	5	4	4.8	5	5	5	5	5	5	4	5	5	4.66667
5	4	5	5	5	5	5	5	5	5	4	5	5	4	5	5	4.8125	5	4	5	5	5	5	5	4.85714	5	4	5	4.66667	5	5	5	5	4	4	5	5	5	5	4.8	5	4	5	4	5	4.6	5	4	5	4.66667
5	4	5	5	4	5	5	5	5	5	4	4	5	5	5	5	4.75	5	5	5	4	4	5	5	4.71429	5	5	5	5	5	4	5	5	5	5	5	5	5	5	4.9	4	5	5	5	5	4.8	5	4	5	4.66667
5	5	5	5	5	4	5	5	5	4	4	4	4	5	4	4	4.5625	4	4	5	5	5	5	4	4.57143	3	4	3	3.33333	4	4	4	4	5	5	4	4	5	3	4.2	4	4	3	4	4	3.8	4	4	4	4.33333
4	4	4	4	4	4	4	4	4	4	5	4	3	4	4	4	4	4	3	4	5	4	4	4	4	4	5	4	4.33333	4	4	4	4	4	5	4	2	2	2	3.5	4	2	2	2	4	2.8	2	4	2	3.33333
4	4	3	4	5	4	4	4	5	4	4	4	4	4	5	4	4.125	4	4	5	4	4	4	4	4.14286	4	3	4	3.66667	4	5	4	4	4	4	4	4	4	5	4.2	4	2	2	2	4	2.8	5	4	4	3.5
4	4	4	4	4	4	5	4	4	4	4	3	4	5	4	4	4.0625	4	4	5	4	4	4	4	4.14286	5	4	4	4.33333	4	4	5	4	4	4	4	4	5	4	4.2	4	5	4	4	5	4.4	4	4	4	4.16667
4	4	4	5	4	4	4	4	4	5	4	4	5	4	4	3	4.125	5	4	4	4	4	5	4	4.28571	4	4	4	4	4	4	5	4	4	4	4	3	5	4	4.1	4	5	4	4	4	4.2	5	4	5	4.33333
4	2	4	4	4	5	4	4	2	4	4	4	5	4	4	4	3.875	4	5	4	4	4	4	4	4.14286	5	4	4	4.33333	4	4	5	4	4	3	4	4	5	4	4.1	4	4	4	5	4	4.2	4	4	5	4.5
4	4	5	4	3	4	4	4	5	4	4	4	4	4	3	4	4	4	4	5	4	4	5	4	4.28571	4	4	5	4.33333	4	5	4	4	3	4	4	4	5	4	4.1	4	4	4	5	4	4.2	4	5	4	4.33333
4	4	4	4	5	4	4	4	4	5	4	4	5	4	5	4	4.25	4	4	5	4	5	4	4	4.28571	5	4	4	4.33333	5	4	4	4	4	5	5	4	2	3	4	4	2	2	2	4	2.8	4	4	2	3.83333
4	4	4	3	4	5	4	4	5	4	4	5	4	4	5	3	4.125	4	5	4	4	4	5	5	4.42857	4	4	5	4.33333	4	5	4	4	5	4	4	4	5	4	4.3	4	4	5	4	4	4.2	5	4	4	3.83333
4	5	4	4	5	5	5	4	4	4	4	4	5	5	5	5	4.5	4	4	5	4	3	4	4	4	3	3	3	3	3	4	4	4	5	5	4	4	4	4	4.1	4	4	4	4	4	4	4	4	4	4.16667
4	4	4	4	4	4	4	5	4	4	4	4	4	4	4	4	4.0625	4	5	4	4	4	4	3	4	3	3	4	3.33333	4	4	4	5	5	5	4	4	4	4	4.3	4	3	3	4	4	3.6	4	4	3	3.83333
4	5	4	4	4	5	5	4	4	4	4	4	4	4	4	5	4.25	3	3	4	5	4	4	4	3.85714	3	4	4	3.66667	3	4	4	4	5	4	3	3	4	4	3.8	4	4	4	4	4	4	4	4	3	3.66667
5	5	5	5	4	4	4	4	4	4	5	4	4	4	5	4	4.375	4	4	5	4	4	3	4	4	3	3	4	3.33333	4	4	5	5	5	5	4	4	4	4	4.4	4	4	4	4	4	4	4	4	3	3.66667
5	5	5	5	4	4	4	5	4	5	5	5	5	4	4	4	4.5625	3	4	4	4	4	4	4	3.85714	3	4	4	3.66667	4	4	4	4	5	4	4	4	5	5	4.3	3	4	3	4	4	3.6	4	4	4	3.83333
5	5	5	5	5	5	4	5	3	4	4	4	4	4	4	4	4.375	4	4	4	4	4	4	5	4.14286	3	4	4	3.66667	4	4	4	4	4	4	5	5	5	4	4.3	4	4	4	4	4	4	4	4	4	4
5	5	5	4	4	4	4	4	4	4	4	4	4	4	4	4	4.1875	3	4	4	4	5	5	5	4.28571	4	4	4	4	4	5	4	4	5	4	4	4	4	4	4.2	4	4	4	4	4	4	4	4	3	3.83333
4	5	5	3	4	5	4	4	5	4	3	4	5	4	4	5	4.25	5	4	4	5	4	4	4	4.28571	5	4	4	4.33333	4	5	5	4	4	5	5	3	5	4	4.4	4	4	5	4	3	4	4	4	5	4
5	4	5	5	5	5	5	5	4	4	4	4	4	4	4	4	4.4375	4	4	4	4	3	4	4	3.85714	3	3	3	3	4	3	4	4	5	5	4	4	5	4	4.2	4	4	4	4	4	4	4	4	4	4.16667
4	3	4	4	5	4	4	4	5	4	5	3	4	4	3	5	4.0625	5	3	4	4	4	5	3	4	3	3	5	3.66667	5	4	4	3	5	4	4	4	3	4	4	3	5	4	3	4	3.8	4	5	3	4
5	4	4	5	4	4	5	4	4	4	4	4	4	4	5	4	4.25	3	4	4	4	4	4	4	3.85714	3	4	3	3.33333	4	3	4	4	5	4	5	4	5	4	4.2	3	3	3	4	4	3.4	4	4	3	3.83333
3	5	3	3	5	4	4	4	4	3	5	4	3	4	3	4	3.8125	5	4	3	5	3	4	4	4	3	5	5	4.33333	5	4	4	3	5	3	3	4	5	4	4	4	5	3	5	4	4.2	3	5	3	3.66667
5	4	4	4	4	4	4	4	4	4	4	4	4	5	4	4	4.125	4	4	4	3	3	4	4	3.71429	4	3	3	3.33333	4	5	4	4	4	4	5	3	4	4	4.1	4	4	4	4	4	4	4	3	3	3.5
4	3	4	5	4	4	3	4	4	3	3	4	5	4	5	4	3.9375	3	5	4	4	3	5	4	4	4	5	3	4	3	5	4	4	4	4	5	3	3	4	3.9	5	3	4	5	3	4	4	5	4	3.83333
5	5	5	5	5	5	5	5	4	4	4	3	4	4	4	4	4.4375	4	4	5	4	4	3	3	3.85714	3	3	4	3.33333	4	5	4	4	5	5	4	4	5	4	4.4	3	3	3	3	3	3	4	4	4	4.16667
4	4	5	3	3	5	4	3	4	5	5	3	5	4	4	3	4	5	3	4	4	3	5	4	4	5	3	5	4.33333	5	5	4	5	3	4	3	4	5	5	4.3	4	4	3	4	3	3.6	4	5	3	4
5	5	5	4	4	5	4	4	4	5	4	4	4	4	4	4	4.3125	3	3	4	5	3	4	4	3.71429	3	4	4	3.66667	4	3	4	5	5	4	5	3	4	4	4.1	3	4	4	4	4	3.8	4	4	4	4
4	3	4	5	3	3	4	4	5	4	3	4	5	4	4	3	3.875	5	4	5	3	5	4	4	4.28571	5	5	3	4.33333	4	5	4	3	4	5	4	3	4	5	4.1	4	4	5	3	4	4	4	5	4	4.16667
5	5	5	4	4	4	4	4	4	5	4	4	4	4	4	4	4.25	5	4	4	4	3	3	4	3.85714	5	4	5	4.66667	3	3	4	4	4	4	4	4	4	4	3.8	4	3	3	4	3	3.4	4	4	4	4.16667
5	4	5	4	3	4	5	5	3	4	5	4	3	4	5	3	4.125	5	4	3	5	4	4	3	4	5	3	5	4.33333	4	4	3	4	4	5	4	4	4	5	4.1	3	5	3	3	4	3.6	5	3	5	4.16667
5	5	5	5	5	4	4	5	5	4	5	4	4	4	4	4	4.5	5	4	4	4	4	5	4	4.28571	4	4	3	3.66667	5	4	4	4	3	5	4	4	4	4	4.1	3	4	4	3	3	3.4	4	4	4	4.16667
4	4	4	4	3	3	4	5	4	5	3	5	4	4	3	4	3.9375	5	4	5	3	5	4	5	4.42857	4	4	5	4.33333	5	3	3	4	3	3	5	3	4	5	3.8	3	5	4	3	4	3.8	4	4	3	3.83333
5	3	4	4	3	5	4	5	4	4	4	3	4	3	5	4	4	4	3	4	4	3	5	4	3.85714	3	5	4	4	5	4	5	3	5	4	5	4	4	3	4.2	5	4	5	4	5	4.6	4	3	4	3.66667
3	5	5	4	4	3	5	4	4	3	4	3	4	4	4	3	3.875	5	3	4	4	3	5	4	4	5	4	5	4.66667	4	3	5	4	4	3	5	4	3	4	3.9	4	3	5	4	4	4	3	4	5	3.83333
5	5	4	4	5	4	4	5	4	4	5	4	4	4	4	4	4.3125	3	3	4	4	4	5	5	4	5	5	4	4.66667	5	4	4	4	5	4	3	4	4	4	4.1	4	4	3	3	4	3.6	3	4	4	3.83333
5	4	4	5	4	5	4	5	3	4	4	5	4	4	3	5	4.25	4	4	5	4	3	5	4	4.14286	3	5	4	4	5	4	5	4	3	5	4	4	5	4	4.3	5	3	5	4	3	4	5	3	5	4
4	4	5	4	3	4	3	5	4	4	3	3	5	4	4	5	4	5	4	5	4	5	4	3	4.28571	5	5	4	4.66667	5	4	5	4	4	4	5	3	5	3	4.2	4	4	4	3	5	4	3	4	4	4
5	4	3	4	3	4	4	4	4	3	4	3	4	3	4	4	3.75	5	3	5	4	5	4	4	4.28571	3	4	4	3.66667	5	3	4	5	3	5	4	3	5	4	4.1	3	4	4	3	5	3.8	4	5	4	4
5	5	5	4	4	5	4	5	4	4	4	4	5	4	4	5	4.4375	4	4	4	4	5	4	4	4.14286	3	3	3	3	5	4	4	4	4	4	5	4	4	4	4.2	4	4	3	3	3	3.4	3	4	4	4
5	5	5	4	4	4	4	5	4	4	5	4	4	4	4	4	4.3125	3	3	4	4	4	4	5	3.85714	4	4	5	4.33333	5	5	4	4	5	4	3	4	4	4	4.2	4	4	3	4	4	3.8	4	4	4	3.83333
5	5	4	4	5	4	4	5	5	5	4	4	4	4	4	4	4.375	5	5	4	4	4	4	4	4.28571	3	4	4	3.66667	4	4	4	4	4	4	4	4	4	5	4.1	5	5	4	4	4	4.4	4	4	4	4
4	4	5	5	5	4	4	4	4	4	5	5	5	4	4	4	4.375	4	4	4	4	3	3	4	3.71429	5	4	4	4.33333	5	4	4	4	4	4	4	4	5	5	4.3	4	4	4	4	4	4	3	4	4	3.83333
4	4	5	5	5	5	5	5	4	4	4	3	4	4	4	4	4.3125	5	4	4	4	3	3	3	3.71429	4	4	4	4	4	4	4	4	4	4	5	4	4	4	4.1	4	3	4	4	4	3.8	3	4	4	3.66667
5	4	4	4	5	5	5	4	4	4	4	4	4	4	4	4	4.25	5	4	4	4	3	3	4	3.85714	4	4	4	4	3	4	4	5	5	4	3	3	4	4	3.9	4	4	4	4	4	4	4	4	4	3.83333
5	4	5	4	5	5	5	5	5	5	4	5	5	5	5	5	4.8125	5	5	5	5	5	4	4	4.71429	4	5	5	4.66667	5	4	5	4	4	5	4	4	5	4	4.4	5	5	5	5	5	5	4	5	5	4.33333
5	4	5	5	5	5	4	5	5	5	4	5	5	5	5	5	4.8125	4	4	5	5	5	4	4	4.42857	5	5	5	5	5	5	4	5	5	4	5	5	5	4	4.7	5	5	4	5	5	4.8	5	5	5	4.83333
4	3	4	5	5	4	5	4	5	4	3	5	4	5	4	5	4.3125	4	5	3	4	5	4	5	4.28571	3	5	4	4	4	5	3	5	4	5	4	5	5	4	4.4	3	5	5	5	4	4.4	4	3	5	4.5
5	4	4	4	5	5	5	5	5	5	5	4	5	5	5	4	4.6875	5	5	5	5	5	4	4	4.71429	4	5	5	4.66667	5	5	5	4	5	5	5	5	4	4	4.7	4	5	5	5	5	4.8	5	5	4	4.33333
4	5	4	5	5	5	4	4	4	5	4	4	5	5	5	4	4.5	4	5	4	5	4	5	5	4.57143	4	5	5	4.66667	4	5	5	4	5	4	4	5	5	4	4.5	5	5	5	4	5	4.8	5	4	5	4.66667
5	5	4	4	5	5	5	5	5	5	4	4	5	5	5	5	4.75	4	5	5	5	4	5	5	4.71429	5	5	4	4.66667	5	5	5	4	5	5	5	5	5	4	4.8	5	5	5	4	4	4.6	5	4	4	4.5
4	3	4	4	3	4	4	4	5	4	3	3	5	4	3	3	3.75	4	5	4	4	3	5	3	4	4	3	5	4	5	4	3	4	4	3	4	5	4	3	3.9	3	4	3	5	4	3.8	3	5	4	4.16667
5	5	5	5	5	4	5	5	5	5	4	5	5	5	5	4	4.8125	5	5	5	4	5	5	5	4.85714	5	4	5	4.66667	5	4	5	5	5	5	5	5	5	5	4.9	4	4	4	5	5	4.4	5	5	5	4.5
5	5	3	4	3	3	4	4	5	4	3	4	4	3	4	3	3.8125	5	4	3	4	3	4	5	4	4	3	4	3.66667	5	4	3	3	4	5	5	3	5	4	4.1	4	3	5	4	4	4	3	5	4	4.5
4	5	5	4	5	5	4	5	4	4	5	5	4	5	5	4	4.5625	5	4	4	5	4	4	5	4.42857	4	4	4	4	4	4	5	4	4	5	5	4	5	5	4.5	4	5	5	4	4	4.4	5	5	5	4.5
5	5	5	5	5	4	5	5	5	5	4	4	5	5	5	5	4.8125	5	4	4	5	5	5	5	4.71429	5	4	5	4.66667	5	5	5	5	5	4	4	4	5	5	4.7	5	5	5	5	5	5	5	5	4	4.83333
5	3	3	4	4	3	3	4	4	3	4	3	4	5	4	3	3.6875	5	3	4	4	3	4	4	3.85714	3	5	4	4	5	4	3	4	4	3	4	3	5	4	3.9	4	3	5	4	3	3.8	5	4	3	4.33333
5	5	4	5	5	4	5	5	5	5	5	5	4	5	5	4	4.75	5	5	5	5	5	4	5	4.85714	5	5	5	5	5	5	4	5	4	4	5	5	5	5	4.7	5	4	4	4	4	4.2	4	5	5	4.33333
4	4	4	3	4	4	4	4	5	3	4	4	4	4	3	4	3.875	5	4	4	4	5	4	3	4.14286	4	4	3	3.66667	5	4	4	3	4	3	5	4	5	4	4.1	4	5	4	4	4	4.2	5	4	3	4.33333
5	5	5	5	5	4	5	5	5	5	5	5	5	4	4	5	4.8125	5	4	5	5	5	5	5	4.85714	4	5	5	4.66667	5	5	5	4	5	5	5	5	4	5	4.8	5	5	4	5	5	4.8	4	5	5	4.33333
5	5	4	5	5	5	5	4	4	5	5	5	4	5	4	5	4.6875	4	5	5	5	4	5	5	4.71429	5	4	5	4.66667	5	4	5	5	5	5	5	5	5	5	4.9	4	5	5	4	5	4.6	5	5	4	4.66667
3	5	4	4	3	3	5	5	4	4	4	4	3	4	4	3	3.875	4	4	5	3	3	3	4	3.71429	3	3	4	3.33333	5	4	3	5	4	4	5	4	4	5	4.3	4	4	3	5	4	4	4	3	4	4.16667
4	4	4	5	5	4	4	5	5	4	5	4	5	5	5	4	4.5	4	5	5	4	5	4	5	4.57143	5	4	5	4.66667	4	4	5	4	4	5	5	5	5	4	4.5	4	5	5	5	5	4.8	5	4	5	4.16667
5	3	4	4	5	4	3	5	4	5	4	4	3	4	4	3	4	5	4	4	4	3	4	4	4	3	4	4	3.66667	5	4	3	4	3	4	4	3	4	4	3.8	3	4	4	3	4	3.6	3	4	3	4
4	3	4	3	4	3	4	5	3	4	3	3	4	4	3	5	3.6875	5	3	5	3	5	3	5	4.14286	3	5	4	4	5	4	4	3	5	4	3	3	5	4	4	4	3	5	3	5	4	3	4	4	3.5
4	4	4	4	5	5	5	5	5	4	5	5	4	5	5	4	4.5625	5	4	4	5	4	4	4	4.28571	5	5	5	5	5	5	5	4	5	5	5	5	4	5	4.8	5	5	5	4	4	4.6	4	4	4	3.83333
4	4	5	3	4	5	3	5	4	3	4	3	4	3	4	3	3.8125	4	5	3	4	4	4	3	3.85714	5	4	4	4.33333	5	4	4	5	3	4	4	4	4	4	4.1	4	3	3	4	5	3.8	3	3	5	3.83333
5	5	5	4	5	5	4	5	4	5	5	4	5	5	5	4	4.6875	4	5	5	4	5	5	4	4.57143	5	5	4	4.66667	4	5	5	4	5	5	5	4	5	5	4.7	4	5	5	5	5	4.8	4	5	5	4.16667
5	3	4	4	3	5	4	5	4	4	3	4	4	5	3	4	4	4	5	4	3	4	3	4	3.85714	3	4	4	3.66667	3	4	5	4	4	3	5	3	5	4	4	3	4	3	5	4	3.8	3	4	5	4.33333
5	3	4	4	3	4	4	5	3	4	4	5	3	5	4	3	3.9375	3	5	4	3	4	4	3	3.71429	5	4	4	4.33333	3	4	4	3	5	4	4	4	4	3	3.8	5	3	5	4	4	4.2	5	3	5	4.16667
5	5	4	3	4	4	5	3	4	3	5	4	4	4	5	4	4.125	3	5	4	5	4	4	3	4	5	4	3	4	4	4	3	5	4	3	4	5	3	4	3.9	3	4	5	4	5	4.2	3	5	4	4.16667
5	5	5	4	5	5	4	5	4	4	4	5	4	5	4	5	4.5625	4	5	4	5	5	4	5	4.57143	4	5	5	4.66667	5	4	4	5	5	5	5	4	5	5	4.7	4	4	5	5	5	4.6	4	5	5	4.33333
4	5	4	4	3	4	4	5	3	4	3	5	4	3	4	5	4	4	3	4	4	3	5	4	3.85714	4	5	4	4.33333	5	4	3	4	3	4	4	5	4	4	4	3	4	5	3	4	3.8	4	5	3	4.33333
4	5	5	4	4	4	4	4	5	5	4	4	4	5	5	4	4.375	4	5	4	4	4	4	4	4.14286	4	4	4	4	5	5	5	5	5	4	4	4	4	4	4.5	5	4	5	4	4	4.4	4	4	4	4
4	5	5	5	4	5	5	4	4	5	5	4	5	4	5	5	4.625	3	4	4	4	4	4	5	4	3	4	4	3.66667	4	5	4	5	5	5	4	4	4	4	4.4	4	4	4	4	4	4	3	4	4	3.83333
4	5	5	5	5	5	5	4	5	4	5	5	4	5	5	4	4.6875	5	4	4	5	5	4	5	4.57143	5	4	5	4.66667	5	4	5	5	5	4	5	4	4	5	4.6	5	5	4	5	4	4.6	5	5	5	4.33333
4	4	4	5	5	4	4	5	5	5	5	4	4	4	4	4	4.375	5	5	4	4	3	3	4	4	4	4	4	4	4	4	4	4	5	4	5	4	4	4	4.2	4	5	4	4	4	4.2	4	4	4	4.5
5	5	5	5	5	5	5	4	4	4	5	4	4	4	4	4	4.5	3	4	4	4	3	4	4	3.71429	3	3	3	3	4	5	5	5	5	4	4	4	5	4	4.5	4	4	4	4	4	4	4	4	3	3.83333
5	4	5	5	5	5	4	4	5	5	4	5	4	5	5	4	4.625	4	5	5	4	5	5	4	4.57143	5	4	5	4.66667	5	5	5	4	5	5	4	5	5	5	4.8	5	4	5	5	5	4.8	5	4	5	4.16667
5	5	4	4	4	4	4	5	4	4	4	4	4	4	4	5	4.25	5	4	4	4	4	4	4	4.14286	3	3	3	3	3	4	4	4	5	4	4	4	5	4	4.1	4	4	4	4	4	4	4	3	4	4.16667
5	4	4	4	5	5	5	4	4	4	5	4	4	4	4	4	4.3125	5	5	5	4	4	4	4	4.42857	3	4	4	3.66667	4	5	5	4	4	4	4	4	4	4	4.2	4	4	4	4	3	3.8	4	3	3	3.5
5	5	4	4	4	4	4	4	4	5	4	4	4	4	4	4	4.1875	5	5	5	4	4	4	4	4.42857	3	3	3	3	5	5	4	4	4	4	5	4	5	4	4.4	4	4	4	4	4	4	3	4	4	3.5
5	4	5	5	4	4	4	5	5	5	5	5	4	4	4	4	4.5	4	4	4	4	3	4	4	3.85714	3	3	4	3.33333	5	5	5	4	4	4	4	4	5	4	4.4	3	4	3	4	4	3.6	4	4	4	3.83333
4	4	4	5	5	5	4	4	5	5	4	5	5	4	5	4	4.5	4	5	5	4	4	5	5	4.57143	5	4	5	4.66667	5	4	5	4	5	5	4	5	5	4	4.6	5	5	4	5	4	4.6	5	4	5	4.33333
4	5	4	4	4	5	5	4	4	4	5	5	5	4	4	4	4.375	5	5	5	5	4	4	4	4.57143	3	3	4	3.33333	4	4	4	4	5	4	4	4	4	4	4.1	4	4	3	4	4	3.8	4	4	4	4.33333
5	4	4	4	4	4	4	5	5	4	4	4	4	4	4	4	4.1875	3	3	4	4	4	4	4	3.71429	3	3	3	3	5	4	4	4	4	4	4	4	4	4	4.1	4	4	4	3	3	3.6	3	3	3	3.5
5	5	4	4	4	4	4	5	5	5	5	4	4	4	4	4	4.375	5	5	4	4	4	4	4	4.28571	3	4	4	3.66667	4	4	4	5	5	4	4	4	4	4	4.2	4	5	3	3	4	3.8	4	4	4	3.5
5	4	4	4	5	5	5	4	4	4	5	5	5	5	5	5	4.625	4	4	4	5	4	4	4	4.14286	3	3	3	3	4	5	5	4	5	4	4	4	4	4	4.3	4	4	4	4	4	4	4	4	4	4
5	4	4	4	5	5	5	5	4	4	4	4	4	4	4	4	4.3125	5	4	4	4	4	4	4	4.14286	3	3	3	3	4	4	4	4	4	4	5	3	4	4	4	4	4	4	4	3	3.8	4	4	4	4
5	4	4	4	5	4	4	5	4	4	4	4	4	4	5	4	4.25	5	4	4	4	4	4	4	4.14286	3	3	3	3	4	5	5	4	4	4	4	4	4	4	4.2	4	4	4	4	4	4	3	3	4	3.66667
5	4	4	4	4	4	5	5	4	4	4	4	4	5	5	5	4.375	4	4	5	5	5	4	4	4.42857	3	3	3	3	4	4	4	4	4	4	4	4	4	5	4.1	4	4	3	4	4	3.8	4	4	4	3.66667
5	5	5	5	5	4	4	4	4	4	4	4	4	5	4	4	4.375	4	4	4	4	4	4	4	4	4	4	3	3.66667	5	4	4	4	3	4	4	4	4	4	4	4	4	5	4	4	4.2	3	3	3	3.5
5	4	5	5	4	5	5	4	4	4	4	4	4	4	4	4	4.3125	5	5	4	4	4	4	4	4.28571	3	3	3	3	5	5	4	4	4	4	5	5	5	4	4.5	4	4	4	4	4	4	4	4	4	3.5
5	5	5	5	5	4	4	4	4	4	5	5	5	4	4	4	4.5	3	3	4	4	4	4	4	3.71429	3	4	4	3.66667	4	4	4	4	4	4	4	4	4	4	4	4	4	3	4	4	3.8	4	4	4	4
4	4	4	4	4	4	4	4	4	4	4	4	4	5	4	4	4.0625	5	5	5	4	4	4	4	4.42857	3	3	3	3	4	4	4	4	4	4	5	3	4	4	4	4	4	3	4	4	3.8	4	4	4	4
5	4	4	4	4	4	5	5	5	5	5	4	5	5	5	5	4.625	4	4	4	4	4	5	4	4.14286	3	3	3	3	3	5	4	4	4	4	5	5	5	5	4.4	4	4	4	4	4	4	4	4	4	4
[truncated: 107 more columns]

## Sheet: DataPLS
TDEV	TRET	NFIN	KTR	KCR	SSTR	SHRV	LECT	PHSB	ENVR	EE1	EE2	EE3	EE4	EE5	EE6	EE7	EE8	EE9	INPR	OTOU
4.06	4.29	4.00	3.87	4.20	4.42	4.29	4.25	4.71	4.14	5.00	5.00	5.00	5.00	5.00	5.00	5.00	5.00	5.00	5.00	5.00
4.13	4.43	1.67	3.63	4.20	4.13	4.88	4.75	5.00	4.71	5.00	5.00	5.00	5.00	5.00	5.00	4.00	4.00	4.00	4.08	4.33
4.63	4.29	3.67	3.80	3.20	4.46	4.33	4.75	5.00	4.57	5.00	5.00	5.00	5.00	5.00	5.00	5.00	5.00	5.00	4.46	3.22
2.88	3.43	3.33	3.70	2.20	2.63	4.13	4.50	4.14	3.14	4.00	4.00	5.00	5.00	5.00	5.00	5.00	5.00	5.00	3.54	2.78
4.38	4.00	4.33	3.87	4.60	4.83	3.71	4.00	4.43	4.43	4.00	4.00	4.00	4.00	5.00	5.00	4.00	3.00	3.00	4.92	4.44
2.25	2.29	3.00	2.98	3.00	2.92	4.00	4.50	2.14	3.14	4.00	4.00	4.00	4.00	4.00	4.00	4.00	4.00	4.00	3.77	2.78
4.69	4.71	4.00	3.80	4.40	4.21	4.13	5.00	4.86	4.86	5.00	4.00	5.00	5.00	5.00	5.00	5.00	5.00	5.00	4.54	5.00
4.38	4.71	5.00	4.78	5.00	5.00	4.46	4.00	4.43	3.86	4.00	4.00	4.00	5.00	5.00	5.00	5.00	4.00	4.00	4.62	3.78
4.44	4.29	4.00	4.25	4.80	4.21	3.96	4.25	4.00	4.57	4.00	4.00	4.00	4.00	4.00	5.00	5.00	4.00	4.00	4.69	4.22
4.00	4.14	4.67	3.32	4.60	4.00	3.83	5.00	4.57	4.57	4.00	4.00	5.00	5.00	5.00	5.00	5.00	5.00	5.00	4.54	4.67
3.44	3.14	3.33	3.07	3.00	3.17	3.21	5.00	4.14	3.71	4.00	4.00	4.00	4.00	4.00	4.00	4.00	4.00	4.00	3.54	3.22
3.75	3.14	2.00	3.73	4.00	3.63	3.38	3.50	4.71	4.00	4.00	4.00	3.00	4.00	4.00	4.00	4.00	4.00	4.00	3.77	3.67
4.19	4.29	4.33	4.18	4.60	3.96	3.83	4.00	4.57	4.29	4.00	5.00	3.00	4.00	3.00	4.00	4.00	3.00	3.00	4.31	3.78
3.88	3.71	3.67	3.73	3.40	4.00	3.63	4.00	4.14	4.14	4.00	4.00	4.00	4.00	4.00	4.00	4.00	4.00	4.00	4.85	3.89
4.00	4.14	4.33	4.20	4.00	5.00	5.00	5.00	4.43	4.86	5.00	5.00	5.00	5.00	5.00	5.00	5.00	5.00	5.00	4.23	4.11
4.31	4.00	4.00	4.25	4.00	4.21	4.00	4.25	4.00	4.00	4.00	4.00	4.00	5.00	4.00	4.00	4.00	4.00	4.00	4.08	4.00
5.00	5.00	4.33	4.83	4.80	4.96	4.88	5.00	5.00	4.57	5.00	5.00	5.00	5.00	5.00	5.00	5.00	5.00	5.00	4.92	4.56
4.75	4.57	4.33	4.90	5.00	4.54	4.75	5.00	4.86	4.86	4.00	5.00	5.00	5.00	5.00	5.00	5.00	4.00	4.00	4.69	4.89
1.13	1.00	1.00	2.00	1.00	1.00	1.00	3.00	3.29	3.14	5.00	5.00	5.00	5.00	5.00	5.00	5.00	5.00	5.00	2.85	3.00
3.94	4.00	2.00	3.30	4.00	4.04	4.00	4.00	4.00	4.00	4.00	4.00	4.00	4.00	5.00	4.00	4.00	4.00	4.00	4.23	4.00
3.88	3.57	5.00	4.33	4.00	4.21	4.33	4.25	4.29	4.00	5.00	4.00	5.00	5.00	5.00	5.00	5.00	5.00	5.00	4.46	3.89
3.06	3.14	4.67	3.87	2.40	3.58	4.13	5.00	4.00	3.71	4.00	4.00	4.00	4.00	4.00	4.00	3.00	3.00	3.00	4.31	3.78
4.88	4.43	5.00	4.42	4.20	4.75	5.00	4.75	4.86	4.57	5.00	5.00	4.00	4.00	5.00	5.00	5.00	5.00	5.00	5.00	4.78
5.00	4.71	3.67	4.83	5.00	5.00	5.00	5.00	5.00	5.00	5.00	5.00	5.00	5.00	5.00	5.00	5.00	5.00	5.00	5.00	5.00
4.38	3.86	3.67	3.95	3.40	4.25	4.17	4.50	4.00	4.14	5.00	5.00	4.00	5.00	5.00	5.00	5.00	2.00	2.00	4.54	4.00
5.00	4.00	4.00	4.45	5.00	5.00	5.00	5.00	5.00	5.00	5.00	5.00	4.00	5.00	5.00	5.00	5.00	5.00	5.00	5.00	5.00
3.44	3.57	3.00	4.00	3.00	3.08	3.00	3.00	3.14	3.00	3.00	3.00	3.00	3.00	3.00	3.00	3.00	3.00	3.00	4.00	4.00
4.44	4.29	4.00	4.15	4.00	4.17	4.00	4.25	4.14	4.14	4.00	4.00	4.00	4.00	4.00	4.00	4.00	4.00	4.00	4.15	4.11
3.31	3.57	3.00	3.25	3.00	3.92	4.00	4.00	4.00	4.00	3.00	4.00	4.00	4.00	4.00	4.00	4.00	4.00	4.00	4.00	4.00
5.00	4.14	4.00	4.45	4.80	5.00	5.00	5.00	5.00	5.00	5.00	5.00	5.00	5.00	5.00	5.00	5.00	5.00	5.00	5.00	5.00
4.19	3.43	4.67	4.58	4.40	4.04	3.21	4.50	4.71	4.29	5.00	5.00	4.00	3.00	4.00	5.00	5.00	3.00	5.00	5.00	3.22
3.31	3.71	3.33	3.95	3.20	3.83	3.46	4.50	4.14	3.57	5.00	5.00	5.00	5.00	5.00	5.00	5.00	5.00	5.00	3.85	2.78
4.50	4.43	5.00	4.32	4.20	4.96	4.71	4.00	4.86	5.00	5.00	5.00	5.00	5.00	5.00	5.00	5.00	5.00	5.00	4.92	4.56
3.56	3.29	3.67	3.98	4.00	4.17	4.42	5.00	4.71	5.00	5.00	5.00	5.00	5.00	5.00	5.00	5.00	5.00	5.00	4.69	4.78
3.75	3.29	4.00	3.98	4.60	4.04	3.00	3.75	4.00	4.14	4.00	4.00	4.00	5.00	4.00	5.00	5.00	4.00	4.00	4.54	4.00
4.00	4.14	4.33	4.30	4.00	4.00	4.00	4.75	4.43	4.14	5.00	5.00	5.00	5.00	5.00	5.00	5.00	5.00	5.00	4.62	5.00
4.75	4.71	4.67	4.50	4.60	4.96	5.00	5.00	4.14	4.71	5.00	5.00	5.00	5.00	5.00	5.00	5.00	5.00	5.00	4.92	4.11
4.38	4.43	5.00	4.70	4.40	4.46	4.46	5.00	4.86	4.71	4.00	4.00	4.00	5.00	5.00	5.00	5.00	5.00	5.00	4.46	4.33
4.38	4.57	4.33	4.40	4.40	4.25	4.50	4.75	4.71	4.86	5.00	5.00	5.00	5.00	4.00	5.00	5.00	4.00	5.00	4.92	4.11
1.06	1.00	1.00	1.85	1.80	1.00	1.00	1.00	1.00	1.00	1.00	1.00	1.00	1.00	1.00	1.00	1.00	1.00	1.00	1.00	1.00
1.13	1.00	2.67	1.63	2.40	2.54	3.00	4.00	4.14	4.14	4.00	4.00	3.00	3.00	4.00	4.00	4.00	3.00	3.00	2.54	2.22
2.69	2.14	2.33	3.05	3.80	3.54	1.25	4.75	4.00	4.57	3.00	3.00	3.00	5.00	5.00	5.00	5.00	4.00	3.00	4.00	1.89
3.56	3.29	3.33	3.38	3.60	3.75	3.50	4.00	3.86	3.86	4.00	4.00	4.00	4.00	4.00	5.00	4.00	4.00	4.00	4.31	3.33
4.00	4.00	5.00	4.47	5.00	4.58	5.00	5.00	4.71	4.86	5.00	5.00	5.00	5.00	5.00	5.00	5.00	5.00	5.00	4.62	4.22
4.19	4.43	4.33	4.48	4.00	4.17	4.38	5.00	4.43	5.00	5.00	5.00	5.00	5.00	5.00	5.00	5.00	5.00	5.00	4.69	4.11
3.50	3.57	4.00	3.43	3.00	3.58	4.46	5.00	4.14	3.14	3.00	3.00	3.00	3.00	4.00	5.00	4.00	5.00	5.00	4.31	3.78
4.13	4.14	3.33	3.67	4.60	4.50	3.46	4.00	4.71	4.14	4.00	4.00	3.00	5.00	5.00	4.00	4.00	5.00	4.00	4.85	4.22
3.00	3.14	3.00	3.47	3.20	3.17	3.17	4.50	3.43	3.57	2.00	2.00	2.00	3.00	4.00	4.00	4.00	4.00	4.00	3.62	2.78
1.06	1.00	1.00	1.50	1.00	1.00	1.00	4.00	2.71	1.00	1.00	1.00	1.00	1.00	5.00	5.00	5.00	1.00	1.00	1.00	1.00
1.44	1.29	2.33	1.73	1.60	1.71	2.17	4.75	2.71	1.57	1.00	1.00	1.00	1.00	1.00	3.00	4.00	1.00	1.00	1.62	1.00
2.31	2.43	2.33	2.13	3.20	2.54	3.04	4.00	3.57	4.14	4.00	4.00	3.00	5.00	5.00	5.00	5.00	5.00	5.00	3.62	2.33
2.94	3.00	2.67	2.42	2.60	3.25	3.33	4.25	4.43	3.00	4.00	4.00	3.00	4.00	4.00	4.00	4.00	4.00	4.00	3.85	2.78
3.94	5.00	4.00	3.98	4.60	4.92	4.38	4.25	4.86	5.00	5.00	5.00	5.00	5.00	5.00	5.00	5.00	5.00	5.00	4.77	3.78
3.69	3.00	3.67	4.07	4.40	3.67	3.33	4.00	4.00	3.86	3.00	3.00	3.00	3.00	4.00	4.00	4.00	3.00	4.00	4.15	3.67
2.94	2.86	3.00	3.23	3.00	3.33	3.50	4.25	4.43	3.00	2.00	3.00	4.00	4.00	4.00	4.00	4.00	4.00	4.00	3.23	3.00
2.25	2.43	3.00	2.65	2.40	2.38	2.38	2.25	2.00	2.00	2.00	2.00	2.00	2.00	2.00	3.00	2.00	2.00	2.00	2.00	2.00
2.63	2.14	2.33	2.30	2.00	2.00	1.88	2.25	2.14	2.14	2.00	2.00	2.00	2.00	2.00	2.00	2.00	2.00	2.00	2.15	2.56
3.75	4.29	3.00	3.38	3.40	3.63	4.00	5.00	5.00	5.00	5.00	5.00	5.00	5.00	5.00	5.00	5.00	5.00	5.00	4.31	4.67
3.00	2.29	2.67	3.05	2.60	3.25	2.79	4.00	4.00	3.57	4.00	4.00	3.00	3.00	4.00	4.00	4.00	4.00	4.00	3.85	3.00
3.25	3.14	3.33	3.13	3.40	3.21	3.38	3.25	3.29	3.71	4.00	3.00	3.00	3.00	3.00	3.00	4.00	3.00	3.00	3.69	3.89
1.06	1.57	2.00	2.28	2.80	2.13	1.00	5.00	4.00	1.57	1.00	1.00	5.00	1.00	4.00	4.00	4.00	4.00	4.00	2.31	1.44
2.56	2.57	2.33	2.15	2.00	3.79	1.46	4.00	4.00	3.43	3.00	3.00	3.00	3.00	3.00	4.00	2.00	2.00	2.00	3.85	2.56
4.25	3.57	3.33	3.90	4.60	4.21	4.00	5.00	5.00	4.43	5.00	5.00	5.00	5.00	5.00	5.00	5.00	4.00	4.00	5.00	4.67
4.50	4.00	4.33	4.08	4.40	4.17	4.67	5.00	5.00	4.86	4.00	4.00	4.00	4.00	4.00	4.00	4.00	4.00	4.00	4.92	5.00
4.25	3.86	4.33	4.58	4.20	4.58	5.00	4.00	4.57	4.71	4.00	4.00	4.00	4.00	4.00	5.00	5.00	4.00	4.00	4.92	3.89
4.63	5.00	5.00	4.68	5.00	5.00	4.88	4.00	4.00	4.86	5.00	4.00	5.00	4.00	4.00	5.00	4.00	4.00	4.00	4.77	5.00
4.75	5.00	3.33	4.78	5.00	4.88	4.75	5.00	4.43	4.86	5.00	5.00	5.00	5.00	5.00	5.00	5.00	5.00	5.00	4.62	4.89
4.06	3.86	3.33	4.40	4.40	4.00	4.00	4.50	4.00	4.00	4.00	4.00	4.00	4.00	4.00	4.00	4.00	4.00	4.00	4.08	4.00
4.63	4.14	3.33	4.30	4.00	4.08	4.13	5.00	5.00	4.29	4.00	4.00	4.00	4.00	5.00	5.00	5.00	4.00	4.00	4.62	4.89
5.00	5.00	5.00	4.75	5.00	4.96	5.00	5.00	5.00	5.00	5.00	5.00	5.00	5.00	5.00	5.00	5.00	5.00	5.00	4.92	5.00
2.94	2.43	3.33	3.92	3.20	3.63	3.63	4.00	3.71	3.57	4.00	4.00	4.00	4.00	4.00	4.00	4.00	4.00	3.00	3.85	3.44
4.25	4.00	4.00	4.00	4.60	4.33	4.42	4.50	4.43	4.71	4.00	4.00	4.00	4.00	5.00	5.00	4.00	4.00	4.00	4.69	4.22
3.31	3.43	2.67	3.62	3.60	2.92	2.38	4.00	4.00	4.00	3.00	3.00	2.00	2.00	3.00	4.00	3.00	3.00	3.00	3.54	4.00
4.38	5.00	5.00	4.53	5.00	3.96	4.00	5.00	5.00	5.00	4.00	4.00	4.00	4.00	4.00	5.00	4.00	4.00	4.00	4.08	4.89
4.56	4.71	3.67	4.82	4.60	4.71	4.00	4.50	5.00	4.86	4.00	4.00	4.00	4.00	4.00	4.00	4.00	4.00	4.00	4.77	4.44
4.19	4.57	4.67	4.30	4.00	4.46	4.00	5.00	5.00	4.29	5.00	4.00	4.00	5.00	5.00	5.00	4.00	5.00	4.00	5.00	4.56
4.13	4.00	4.00	4.68	4.60	5.00	5.00	5.00	4.86	4.86	5.00	5.00	5.00	5.00	5.00	5.00	5.00	5.00	5.00	5.00	5.00
4.31	4.71	3.00	4.40	3.60	4.33	5.00	4.75	4.71	4.71	5.00	5.00	4.00	5.00	5.00	5.00	5.00	5.00	5.00	4.54	3.89
3.38	3.14	3.33	3.48	3.80	3.88	3.75	4.00	4.57	4.00	4.00	5.00	5.00	5.00	5.00	5.00	5.00	3.00	4.00	4.38	4.22
4.25	4.14	4.00	3.83	4.00	4.00	4.00	4.00	4.00	4.00	4.00	4.00	4.00	4.00	5.00	4.00	5.00	5.00	5.00	5.00	4.44
3.44	3.43	2.33	3.57	3.40	3.50	3.29	4.50	3.43	4.00	4.00	4.00	4.00	4.00	4.00	5.00	4.00	5.00	4.00	3.85	2.56
4.38	4.57	4.00	4.02	3.60	4.17	4.25	4.50	4.14	3.86	4.00	5.00	3.00	5.00	5.00	5.00	5.00	5.00	5.00	4.08	4.22
3.44	3.43	4.33	3.87	3.80	3.92	3.75	4.50	4.14	4.71	4.00	4.00	4.00	4.00	4.00	4.00	4.00	4.00	4.00	5.00	5.00
5.00	4.71	5.00	4.62	5.00	5.00	4.88	5.00	5.00	5.00	5.00	5.00	5.00	5.00	5.00	5.00	5.00	5.00	5.00	5.00	5.00
5.00	4.86	4.33	4.92	5.00	4.83	4.63	5.00	5.00	4.86	5.00	5.00	4.00	5.00	5.00	5.00	5.00	5.00	5.00	4.77	4.44
4.00	3.57	4.00	4.17	4.00	4.04	4.00	4.00	4.00	4.00	4.00	3.00	3.00	4.00	4.00	4.00	4.00	4.00	4.00	4.62	4.00
4.31	4.00	3.67	4.00	4.40	4.00	4.54	4.00	4.86	4.71	5.00	5.00	5.00	5.00	5.00	5.00	5.00	5.00	5.00	4.69	5.00
4.31	3.71	3.67	3.93	3.60	4.25	4.25	5.00	4.57	4.00	5.00	4.00	4.00	4.00	5.00	5.00	4.00	5.00	5.00	4.92	4.00
3.50	3.43	4.67	3.02	2.40	3.50	3.00	5.00	3.57	4.00	4.00	4.00	4.00	4.00	3.00	5.00	5.00	5.00	5.00	4.69	3.22
2.94	3.57	3.00	3.82	2.60	4.54	4.25	4.75	5.00	4.14	4.00	5.00	3.00	5.00	5.00	5.00	5.00	5.00	5.00	4.23	4.22
4.31	4.43	4.33	4.12	4.40	4.29	4.17	4.25	4.14	4.00	4.00	5.00	4.00	4.00	5.00	4.00	4.00	4.00	4.00	4.69	5.00
5.00	5.00	5.00	4.83	5.00	5.00	5.00	5.00	5.00	5.00	5.00	5.00	5.00	5.00	5.00	5.00	5.00	5.00	5.00	5.00	5.00
3.81	4.00	4.67	4.23	3.60	3.92	3.92	3.75	4.29	4.00	4.00	4.00	4.00	4.00	4.00	4.00	4.00	4.00	4.00	4.62	2.89
4.31	4.00	3.67	4.13	4.00	4.00	4.00	4.00	4.00	4.71	4.00	4.00	4.00	4.00	4.00	4.00	4.00	4.00	4.00	4.69	3.67
1.81	2.00	1.67	2.10	1.00	1.00	1.92	3.00	2.43	1.86	3.00	3.00	3.00	5.00	5.00	5.00	5.00	3.00	3.00	3.15	2.00
5.00	5.00	5.00	4.00	5.00	5.00	5.00	5.00	5.00	5.00	5.00	5.00	5.00	5.00	5.00	5.00	5.00	5.00	5.00	5.00	5.00
3.00	3.14	2.67	3.55	2.00	2.75	2.79	4.50	3.29	3.29	2.00	2.00	4.00	5.00	5.00	5.00	5.00	5.00	5.00	3.00	2.44
5.00	4.57	3.33	4.50	5.00	4.75	4.50	5.00	5.00	4.14	5.00	5.00	4.00	4.00	4.00	4.00	4.00	4.00	4.00	4.15	4.33
4.19	4.00	4.67	4.55	4.00	4.04	4.00	4.75	4.43	4.43	4.00	5.00	4.00	5.00	5.00	5.00	5.00	4.00	4.00	4.62	4.56
3.69	3.57	3.67	4.00	4.00	4.04	3.75	5.00	5.00	4.29	5.00	5.00	5.00	5.00	5.00	5.00	5.00	4.00	4.00	4.54	4.67
4.50	3.86	4.00	4.45	4.80	4.92	5.00	5.00	4.71	4.71	4.00	4.00	4.00	5.00	5.00	5.00	5.00	5.00	5.00	5.00	4.78
3.56	3.00	3.33	3.72	2.60	3.42	3.38	4.00	3.43	3.57	4.00	4.00	3.00	4.00	4.00	4.00	4.00	3.00	3.00	4.15	2.78
3.63	3.14	2.33	3.67	4.00	3.92	4.00	4.00	4.14	3.86	4.00	4.00	4.00	4.00	4.00	4.00	4.00	4.00	3.00	5.00	4.11
3.63	3.57	3.67	3.43	3.40	3.88	3.25	4.50	4.00	4.29	4.00	3.00	4.00	4.00	4.00	5.00	5.00	4.00	4.00	4.08	3.56
4.13	3.14	1.67	3.72	4.40	4.25	4.08	4.00	4.71	4.71	4.00	4.00	3.00	4.00	4.00	5.00	4.00	3.00	3.00	5.00	5.00
3.38	3.57	3.00	3.40	3.40	3.46	3.71	4.00	3.86	4.00	4.00	4.00	4.00	3.00	3.00	4.00	4.00	4.00	4.00	3.38	3.44
2.50	2.71	3.33	2.87	1.00	2.42	2.08	4.75	1.71	2.43	4.00	4.00	4.00	5.00	5.00	5.00	5.00	5.00	5.00	3.23	2.11
5.00	5.00	5.00	4.50	5.00	5.00	5.00	5.00	5.00	5.00	5.00	5.00	5.00	5.00	5.00	5.00	5.00	5.00	5.00	5.00	5.00
5.00	5.00	5.00	5.00	5.00	5.00	5.00	4.25	4.71	5.00	5.00	5.00	4.00	5.00	5.00	5.00	5.00	5.00	5.00	5.00	5.00
5.00	5.00	5.00	5.00	5.00	5.00	5.00	5.00	5.00	5.00	5.00	5.00	5.00	5.00	5.00	5.00	5.00	5.00	5.00	5.00	5.00
3.50	3.14	3.67	3.77	3.00	4.13	3.58	4.25	4.71	4.00	3.00	4.00	4.00	5.00	4.00	4.00	4.00	3.00	4.00	4.08	2.67
4.25	4.14	4.00	4.05	4.00	3.92	4.08	4.75	4.00	4.86	4.00	4.00	4.00	4.00	4.00	4.00	4.00	4.00	4.00	4.85	3.89
3.44	3.86	3.67	3.62	3.40	3.17	3.13	3.50	3.86	3.43	3.00	3.00	3.00	4.00	4.00	4.00	4.00	3.00	3.00	3.77	2.89
3.31	3.14	4.33	3.33	3.00	3.21	3.88	5.00	3.29	3.43	5.00	5.00	5.00	5.00	5.00	5.00	5.00	4.00	4.00	3.08	2.33
5.00	5.00	5.00	4.20	4.00	4.08	4.50	5.00	4.86	4.71	5.00	5.00	5.00	5.00	5.00	5.00	5.00	4.00	4.00	4.92	4.44
4.75	5.00	4.67	4.73	4.00	4.63	4.83	4.50	5.00	5.00	5.00	5.00	5.00	5.00	5.00	5.00	5.00	5.00	5.00	4.92	4.67
5.00	5.00	5.00	4.83	4.60	4.88	5.00	4.25	4.71	4.71	5.00	5.00	4.00	4.00	5.00	4.00	4.00	4.00	3.00	5.00	4.11
4.44	4.86	5.00	4.03	3.40	4.63	4.67	5.00	5.00	4.86	5.00	5.00	4.00	5.00	5.00	5.00	5.00	5.00	5.00	4.85	3.22
3.13	3.29	2.00	3.33	3.20	3.71	3.17	3.50	3.43	3.71	4.00	4.00	4.00	4.00	4.00	4.00	4.00	4.00	4.00	3.85	3.00
5.00	2.71	3.67	3.75	3.80	4.33	4.17	4.75	4.14	4.71	5.00	4.00	5.00	5.00	5.00	5.00	5.00	5.00	5.00	4.69	4.44
4.00	3.71	3.33	3.92	4.20	4.58	4.58	3.75	4.29	4.29	4.00	4.00	4.00	4.00	5.00	5.00	4.00	4.00	4.00	4.46	3.89
4.31	4.00	4.67	4.28	4.40	4.21	4.17	4.50	4.43	5.00	4.00	5.00	5.00	5.00	4.00	4.00	4.00	4.00	5.00	4.85	4.56
4.50	4.14	3.00	4.38	5.00	4.67	5.00	5.00	4.29	4.57	5.00	5.00	5.00	5.00	5.00	5.00	5.00	5.00	5.00	4.08	3.22
2.88	2.14	2.67	3.50	3.20	3.79	3.79	3.75	4.29	4.14	3.00	4.00	3.00	4.00	5.00	5.00	4.00	3.00	3.00	3.85	2.78
4.88	3.43	4.33	4.22	3.40	3.75	3.50	4.00	4.29	4.00	4.00	4.00	4.00	4.00	4.00	5.00	4.00	4.00	4.00	4.54	4.00
4.00	4.00	4.00	4.08	4.00	4.00	4.00	4.00	4.00	4.00	4.00	4.00	4.00	4.00	4.00	4.00	4.00	4.00	4.00	4.00	4.00
4.38	4.00	3.67	4.10	4.00	4.04	4.00	4.00	3.86	4.00	4.00	4.00	4.00	4.00	4.00	5.00	4.00	5.00	5.00	4.08	4.00
4.38	4.14	2.67	4.35	3.80	4.25	4.13	4.50	4.14	4.14	5.00	5.00	5.00	5.00	5.00	5.00	4.00	4.00	4.00	4.69	3.56
4.06	3.86	3.00	4.33	4.00	4.04	4.00	4.00	4.14	4.14	4.00	4.00	4.00	4.00	4.00	4.00	5.00	5.00	5.00	4.23	4.11
4.25	3.86	4.00	4.08	3.60	4.17	4.00	4.25	4.14	3.71	4.00	3.00	5.00	5.00	2.00	5.00	2.00	4.00	4.00	4.46	3.89
4.75	5.00	4.33	4.47	4.80	5.00	5.00	5.00	5.00	5.00	5.00	5.00	5.00	5.00	5.00	5.00	5.00	5.00	5.00	4.69	4.89
3.75	3.86	4.33	3.67	3.00	4.08	3.83	5.00	4.00	3.71	5.00	5.00	5.00	5.00	5.00	5.00	5.00	5.00	5.00	4.31	4.33
4.50	4.00	4.00	3.75	4.00	4.17	3.13	5.00	4.86	4.29	4.00	4.00	3.00	5.00	5.00	5.00	3.00	3.00	2.00	5.00	5.00
3.13	3.57	2.67	3.37	3.60	3.75	3.75	4.75	3.57	3.43	4.00	4.00	4.00	4.00	4.00	4.00	4.00	3.00	3.00	3.62	3.22
3.44	3.14	4.33	3.47	3.80	3.54	3.25	4.75	4.43	4.14	4.00	4.00	4.00	4.00	4.00	4.00	5.00	5.00	4.00	4.23	3.78
3.00	3.00	3.00	3.40	3.00	2.96	3.25	5.00	3.43	3.00	4.00	5.00	4.00	4.00	4.00	5.00	4.00	4.00	4.00	3.85	3.00
5.00	5.00	5.00	4.50	5.00	5.00	5.00	5.00	5.00	5.00	5.00	5.00	5.00	5.00	5.00	5.00	5.00	5.00	5.00	5.00	4.44
3.44	3.43	4.33	4.00	3.60	3.67	3.67	4.00	4.00	4.00	4.00	4.00	3.00	4.00	4.00	4.00	4.00	4.00	4.00	4.00	3.67
2.63	3.29	3.00	3.03	3.60	3.17	3.50	3.75	3.29	3.43	3.00	3.00	3.00	4.00	4.00	4.00	3.00	4.00	4.00	3.85	3.11
3.50	3.57	4.00	3.48	3.80	3.58	3.00	5.00	4.29	4.71	3.00	4.00	4.00	5.00	4.00	5.00	5.00	4.00	4.00	4.15	4.33
4.44	4.14	5.00	3.93	5.00	4.46	3.71	4.50	4.86	4.29	5.00	5.00	4.00	4.00	5.00	5.00	5.00	3.00	5.00	4.46	4.44
3.00	2.57	1.00	3.98	4.00	4.00	4.00	4.00	4.00	4.00	4.00	4.00	4.00	4.00	4.00	4.00	4.00	4.00	4.00	4.00	4.00
1.56	1.29	1.67	3.27	4.60	3.08	2.33	2.75	3.71	3.14	1.00	2.00	1.00	1.00	3.00	2.00	3.00	3.00	3.00	3.08	3.22
3.88	3.86	4.67	3.27	4.20	4.63	4.25	5.00	4.71	4.86	5.00	5.00	5.00	5.00	5.00	5.00	5.00	5.00	4.00	4.69	4.33
4.06	3.71	4.00	4.05	4.00	2.96	2.75	5.00	5.00	3.86	4.00	5.00	5.00	5.00	5.00	5.00	5.00	5.00	5.00	4.85	2.22
4.31	4.43	5.00	4.25	5.00	4.92	5.00	5.00	5.00	5.00	5.00	5.00	5.00	5.00	5.00	5.00	5.00	5.00	5.00	4.92	4.78
4.19	4.71	5.00	4.65	5.00	4.71	4.88	5.00	4.86	5.00	5.00	5.00	5.00	5.00	5.00	5.00	5.00	5.00	5.00	5.00	5.00
4.38	4.14	4.33	4.57	4.40	4.58	4.54	4.25	4.57	4.29	4.00	4.00	4.00	5.00	5.00	5.00	5.00	5.00	5.00	4.92	4.11
3.81	3.00	3.33	3.92	4.00	4.00	4.00	4.75	4.57	4.71	4.00	4.00	4.00	4.00	4.00	4.00	4.00	4.00	4.00	4.38	4.11
5.00	5.00	4.67	4.65	5.00	4.71	4.33	5.00	4.14	4.43	5.00	5.00	5.00	5.00	5.00	5.00	5.00	4.00	4.00	4.62	4.33
4.75	4.29	4.00	4.57	5.00	4.00	4.21	4.00	4.43	4.57	5.00	5.00	5.00	5.00	5.00	5.00	5.00	5.00	5.00	5.00	4.78
4.06	4.43	3.33	3.97	4.20	3.46	3.46	4.75	3.71	4.00	5.00	4.00	4.00	4.00	4.00	4.00	5.00	5.00	4.00	4.31	4.11
5.00	5.00	4.67	4.75	5.00	4.83	5.00	5.00	5.00	5.00	5.00	5.00	5.00	5.00	5.00	5.00	5.00	5.00	5.00	5.00	5.00
4.31	3.57	4.00	4.20	4.00	4.17	4.38	4.75	4.00	4.00	5.00	5.00	4.00	4.00	5.00	5.00	5.00	4.00	4.00	4.85	5.00
3.81	3.43	4.00	3.70	3.80	3.92	3.58	4.25	4.14	3.86	4.00	4.00	4.00	4.00	4.00	4.00	4.00	4.00	4.00	4.15	3.78
3.88	4.00	3.67	3.25	5.00	2.63	2.50	4.50	4.71	5.00	5.00	5.00	5.00	5.00	5.00	5.00	5.00	5.00	5.00	3.38	2.89
4.31	3.43	3.33	3.88	3.40	4.50	4.42	5.00	4.86	4.29	5.00	5.00	5.00	5.00	5.00	5.00	5.00	5.00	5.00	4.08	3.89
3.88	5.00	4.33	4.83	4.40	4.75	5.00	4.75	5.00	5.00	5.00	5.00	5.00	5.00	5.00	5.00	5.00	5.00	5.00	4.85	4.89
4.94	5.00	5.00	5.00	5.00	5.00	5.00	5.00	5.00	5.00	5.00	5.00	5.00	5.00	5.00	5.00	5.00	5.00	5.00	5.00	5.00
4.31	4.00	3.67	4.30	4.20	4.17	4.00	4.00	4.57	4.14	4.00	4.00	4.00	4.00	4.00	5.00	5.00	4.00	4.00	4.08	4.00
4.44	4.29	4.67	4.48	5.00	4.83	4.25	4.50	5.00	5.00	5.00	4.00	4.00	4.00	5.00	5.00	5.00	5.00	5.00	4.62	4.67
4.00	4.00	4.00	4.08	4.00	4.00	4.00	4.00	4.00	4.00	4.00	4.00	4.00	4.00	4.00	4.00	4.00	4.00	4.00	4.00	4.00
5.00	5.00	5.00	4.60	5.00	4.96	4.54	5.00	5.00	5.00	5.00	5.00	5.00	5.00	5.00	5.00	5.00	5.00	5.00	4.92	5.00
4.00	5.00	5.00	4.90	5.00	4.13	2.92	5.00	4.00	5.00	5.00	5.00	5.00	5.00	5.00	5.00	5.00	5.00	4.00	5.00	3.89
5.00	5.00	5.00	5.00	5.00	5.00	5.00	5.00	5.00	5.00	5.00	5.00	5.00	5.00	5.00	5.00	5.00	5.00	5.00	5.00	5.00
4.06	3.71	3.00	4.08	3.80	4.04	4.00	5.00	4.14	3.86	5.00	5.00	5.00	5.00	5.00	5.00	5.00	5.00	5.00	4.08	4.22
4.44	4.43	4.67	3.68	4.80	4.50	3.96	4.00	5.00	4.43	4.00	4.00	4.00	4.00	5.00	5.00	3.00	3.00	3.00	5.00	4.78
4.19	4.43	4.00	3.97	4.20	4.08	4.17	4.25	4.14	4.00	4.00	4.00	4.00	4.00	4.00	4.00	4.00	4.00	4.00	4.00	4.11
4.31	4.43	4.33	4.27	4.00	4.38	4.58	4.50	4.43	4.29	4.00	5.00	4.00	4.00	4.00	4.00	5.00	4.00	4.00	4.62	4.00
4.00	3.71	4.33	4.28	4.20	4.17	3.96	4.50	4.00	4.00	4.00	5.00	4.00	4.00	5.00	5.00	5.00	5.00	5.00	3.77	3.00
4.00	3.71	4.33	4.37	4.20	4.17	3.96	4.50	4.00	4.00	4.00	5.00	4.00	4.00	5.00	5.00	5.00	5.00	5.00	3.77	3.00
4.69	4.00	5.00	4.63	5.00	4.25	3.88	5.00	4.43	4.14	4.00	4.00	4.00	5.00	5.00	5.00	5.00	5.00	5.00	4.46	3.89
4.38	4.00	4.00	3.98	4.00	4.25	3.88	4.00	4.29	4.14	4.00	4.00	4.00	4.00	4.00	4.00	4.00	4.00	3.00	3.92	4.00
4.56	3.57	4.00	3.48	4.40	4.29	4.00	4.00	4.57	4.00	4.00	4.00	3.00	4.00	4.00	4.00	4.00	4.00	4.00	4.46	4.11
4.88	4.00	4.00	3.95	4.00	2.88	3.00	3.25	3.00	3.14	3.00	3.00	3.00	3.00	3.00	3.00	3.00	3.00	3.00	3.46	2.67
4.44	4.14	4.00	4.22	4.20	4.46	4.08	4.50	4.86	4.57	5.00	5.00	5.00	5.00	5.00	5.00	4.00	5.00	5.00	4.62	4.00
2.75	2.86	2.67	3.13	2.00	2.67	2.63	3.50	2.71	2.57	3.00	3.00	3.00	4.00	3.00	4.00	4.00	4.00	4.00	2.85	2.33
3.69	3.86	4.67	3.57	3.40	4.00	4.00	3.75	3.86	4.00	4.00	4.00	4.00	4.00	4.00	4.00	4.00	5.00	5.00	4.69	3.56
1.88	2.00	3.67	2.57	2.00	1.88	1.83	5.00	3.71	3.14	5.00	5.00	5.00	5.00	5.00	5.00	5.00	5.00	5.00	2.62	1.78
5.00	5.00	5.00	4.42	4.80	5.00	5.00	5.00	5.00	5.00	5.00	5.00	5.00	5.00	5.00	5.00	5.00	5.00	5.00	5.00	5.00
4.94	4.57	5.00	4.87	4.80	4.00	3.75	4.75	5.00	4.86	5.00	5.00	4.00	5.00	5.00	5.00	5.00	5.00	5.00	4.85	4.89
3.63	4.14	4.00	3.30	2.40	3.21	3.33	4.75	4.29	3.57	4.00	5.00	5.00	5.00	5.00	5.00	5.00	5.00	5.00	4.62	2.78
2.88	3.00	2.33	2.82	2.80	3.88	3.88	5.00	4.57	4.00	4.00	4.00	4.00	4.00	4.00	4.00	4.00	4.00	4.00	3.62	2.22
3.44	3.86	4.00	3.33	4.00	4.17	3.67	4.00	4.43	3.71	4.00	4.00	4.00	4.00	4.00	5.00	4.00	3.00	3.00	4.23	2.78
3.88	4.00	3.67	3.92	3.80	3.88	3.88	5.00	4.00	4.29	4.00	4.00	4.00	4.00	4.00	5.00	5.00	5.00	5.00	4.77	3.67
3.94	3.00	2.00	3.67	3.00	3.71	3.63	4.75	4.29	4.43	5.00	5.00	4.00	4.00	4.00	4.00	4.00	4.00	4.00	4.23	3.67
4.94	5.00	2.00	3.22	5.00	5.00	5.00	5.00	4.71	5.00	5.00	5.00	5.00	5.00	5.00	5.00	5.00	5.00	5.00	4.69	5.00
4.19	3.57	5.00	3.72	3.40	4.00	4.46	4.75	4.71	4.29	4.00	5.00	4.00	5.00	5.00	5.00	5.00	5.00	4.00	4.38	3.89
3.75	2.29	4.33	3.50	3.80	3.71	3.96	4.25	4.00	4.00	4.00	4.00	4.00	5.00	4.00	4.00	4.00	4.00	4.00	3.92	3.33
4.00	3.86	4.67	3.68	3.80	3.75	3.58	4.25	4.57	4.00	4.00	4.00	3.00	4.00	4.00	4.00	4.00	4.00	4.00	3.85	2.56
4.63	3.57	4.00	3.83	4.00	4.00	4.00	4.75	4.00	4.00	5.00	4.00	4.00	4.00	4.00	4.00	4.00	4.00	4.00	4.92	4.00
3.94	4.00	4.00	4.00	4.00	4.00	4.00	4.00	4.00	4.00	4.00	4.00	4.00	4.00	4.00	4.00	4.00	4.00	4.00	4.38	4.00
5.00	5.00	5.00	4.70	5.00	4.96	5.00	5.00	5.00	4.86	5.00	5.00	5.00	5.00	5.00	5.00	5.00	5.00	5.00	4.85	4.33
3.31	3.00	3.67	3.60	3.60	3.04	3.13	4.25	3.57	3.71	3.00	3.00	3.00	3.00	3.00	3.00	4.00	3.00	3.00	3.46	3.22
3.63	3.57	3.33	3.00	2.20	4.00	4.00	4.25	4.00	4.14	4.00	4.00	4.00	4.00	4.00	4.00	4.00	4.00	5.00	4.85	5.00
3.56	3.29	4.00	3.35	3.80	4.25	3.58	3.50	4.00	4.00	4.00	4.00	3.00	4.00	4.00	4.00	4.00	5.00	4.00	3.85	3.78
4.13	2.71	5.00	3.05	3.40	3.38	3.25	5.00	4.71	4.43	4.00	4.00	4.00	5.00	5.00	4.00	5.00	4.00	4.00	4.62	3.00
3.19	2.71	3.00	3.43	3.20	3.17	2.50	4.25	3.71	3.43	3.00	3.00	3.00	4.00	4.00	4.00	4.00	4.00	4.00	3.46	2.89
3.88	3.86	4.00	3.50	3.80	3.63	3.58	4.00	4.00	3.86	4.00	4.00	4.00	5.00	5.00	5.00	4.00	4.00	4.00	4.15	4.00
4.00	4.00	3.33	3.83	4.00	4.00	3.42	4.50	3.86	4.00	4.00	4.00	4.00	4.00	4.00	5.00	5.00	4.00	4.00	4.62	4.00
4.94	4.57	4.00	4.32	4.20	4.75	5.00	5.00	4.86	5.00	5.00	5.00	4.00	5.00	5.00	5.00	5.00	5.00	5.00	4.77	4.78
5.00	4.57	4.00	4.45	4.20	4.42	4.42	5.00	5.00	4.71	5.00	5.00	4.00	5.00	4.00	5.00	5.00	5.00	5.00	4.62	4.89
4.38	4.57	4.33	4.52	4.20	4.42	4.33	5.00	4.29	4.71	5.00	5.00	4.00	4.00	5.00	5.00	5.00	5.00	5.00	4.69	4.44
3.44	3.14	3.67	4.17	4.00	3.54	4.00	4.00	4.00	3.86	4.00	4.00	4.00	4.00	4.00	4.00	4.00	4.00	4.00	4.08	4.11
3.38	3.86	4.33	4.08	3.80	4.00	4.13	4.50	4.43	4.43	4.00	4.00	4.00	5.00	4.00	4.00	5.00	4.00	2.00	4.69	3.33
4.88	4.86	4.00	4.78	4.80	4.54	4.17	5.00	4.71	4.71	5.00	5.00	5.00	5.00	5.00	5.00	5.00	5.00	5.00	4.69	4.56
4.44	3.57	4.33	3.92	3.60	4.50	3.42	4.75	4.14	4.43	5.00	5.00	5.00	4.00	5.00	5.00	4.00	5.00	3.00	4.54	3.56
2.25	2.14	2.33	2.77	2.60	3.04	3.50	4.50	3.43	3.43	2.00	4.00	3.00	4.00	5.00	5.00	5.00	5.00	5.00	2.92	2.56
3.56	3.29	2.67	2.63	2.00	3.25	3.13	4.00	4.00	3.71	4.00	4.00	4.00	5.00	5.00	5.00	5.00	5.00	5.00	4.00	3.22
3.94	4.14	4.33	3.95	4.20	3.88	4.00	4.00	4.14	4.14	5.00	5.00	4.00	5.00	5.00	5.00	5.00	5.00	5.00	4.62	2.89
3.00	3.14	3.33	3.47	3.20	3.17	3.33	4.00	3.71	3.71	3.00	3.00	3.00	3.00	4.00	4.00	4.00	4.00	4.00	3.31	3.00
2.94	3.14	4.00	3.78	4.60	4.21	2.96	4.00	3.43	4.00	4.00	5.00	5.00	5.00	5.00	5.00	5.00	5.00	5.00	4.23	3.33
3.69	4.00	4.00	3.65	3.60	3.88	3.63	4.00	4.00	4.14	4.00	5.00	4.00	5.00	5.00	5.00	4.00	5.00	5.00	4.62	4.33
4.31	4.14	3.67	3.88	3.80	4.00	4.00	5.00	4.14	4.14	5.00	5.00	5.00	5.00	5.00	5.00	5.00	5.00	5.00	4.62	4.00
3.50	4.29	2.33	3.73	3.40	3.54	3.58	4.50	4.57	4.00	4.00	4.00	4.00	5.00	5.00	5.00	4.00	4.00	3.00	4.23	3.56
3.75	4.00	4.33	3.50	4.00	3.88	3.96	4.25	4.29	4.00	4.00	4.00	4.00	4.00	4.00	5.00	4.00	1.00	1.00	4.54	3.11
4.31	3.71	3.67	4.10	4.60	4.13	4.50	4.75	4.29	4.71	4.00	5.00	4.00	4.00	5.00	5.00	5.00	5.00	5.00	4.62	3.78
4.19	4.00	4.00	3.53	4.60	4.25	4.08	4.00	4.00	4.14	4.00	4.00	4.00	4.00	4.00	5.00	5.00	5.00	5.00	4.92	3.56
3.56	4.14	5.00	3.68	3.60	3.63	3.50	3.75	3.86	4.00	3.00	3.00	3.00	3.00	4.00	4.00	4.00	3.00	3.00	4.15	3.33
4.63	4.29	3.33	3.57	3.60	4.71	4.63	5.00	4.00	4.86	5.00	5.00	5.00	4.00	4.00	5.00	4.00	4.00	4.00	4.46	3.22
3.25	3.14	3.00	2.83	3.60	3.50	1.88	4.25	3.14	3.57	4.00	3.00	5.00	5.00	4.00	5.00	4.00	3.00	2.00	4.77	3.44
3.13	3.71	2.67	2.88	3.00	3.25	2.67	4.00	3.29	3.14	3.00	4.00	3.00	4.00	3.00	4.00	4.00	4.00	4.00	3.77	2.89
3.88	3.57	3.00	3.75	4.00	4.00	4.00	4.00	4.00	4.00	4.00	4.00	4.00	4.00	4.00	4.00	4.00	4.00	4.00	4.08	5.00
3.56	3.29	2.33	3.20	4.00	3.58	2.88	4.00	3.43	3.71	4.00	4.00	4.00	4.00	4.00	4.00	4.00	2.00	2.00	3.92	3.89
3.88	3.86	3.33	3.75	4.60	4.46	4.71	5.00	4.14	4.57	4.00	4.00	5.00	5.00	5.00	5.00	5.00	4.00	4.00	4.85	3.78
4.63	5.00	4.33	4.07	5.00	4.46	5.00	4.25	5.00	4.43	4.00	4.00	5.00	5.00	5.00	5.00	5.00	4.00	4.00	4.54	2.44
4.56	4.71	5.00	4.27	3.40	4.04	4.00	3.75	4.29	4.14	4.00	4.00	5.00	5.00	5.00	5.00	5.00	4.00	4.00	4.38	3.44
5.00	5.00	5.00	4.78	5.00	4.96	5.00	5.00	5.00	5.00	4.00	4.00	5.00	5.00	5.00	5.00	5.00	4.00	4.00	5.00	5.00
4.75	3.71	5.00	4.37	4.20	4.46	4.46	5.00	4.71	4.86	4.00	4.00	5.00	5.00	5.00	5.00	5.00	4.00	4.00	4.62	4.56
4.06	3.86	4.00	3.65	3.40	3.46	3.75	3.75	3.71	4.29	4.00	4.00	5.00	5.00	5.00	5.00	5.00	4.00	4.00	3.31	3.56
4.31	3.71	3.33	3.07	3.00	3.54	3.58	3.75	3.71	3.29	4.00	4.00	5.00	5.00	5.00	5.00	5.00	4.00	4.00	3.92	4.00
4.06	4.29	4.67	3.68	4.00	4.17	3.88	4.25	3.71	4.14	4.00	4.00	5.00	5.00	5.00	5.00	5.00	4.00	4.00	4.08	4.11
4.00	4.29	4.33	4.45	4.60	3.88	3.54	3.75	4.14	3.86	4.00	4.00	5.00	5.00	5.00	5.00	5.00	4.00	4.00	4.08	4.22
3.75	3.71	4.33	3.67	3.60	3.92	4.04	4.25	3.86	4.14	4.00	4.00	5.00	5.00	5.00	5.00	5.00	4.00	4.00	4.08	4.00
3.94	4.00	4.00	4.28	3.80	3.92	4.29	4.00	4.29	4.29	4.00	4.00	5.00	5.00	5.00	5.00	5.00	4.00	4.00	4.31	4.33
4.19	4.43	4.33	3.65	3.00	4.33	4.42	4.00	4.00	3.71	4.00	4.00	5.00	5.00	5.00	5.00	5.00	4.00	4.00	4.08	4.33
4.19	4.14	4.00	3.03	3.00	3.42	3.71	3.00	3.00	3.29	4.00	4.00	5.00	5.00	5.00	5.00	5.00	4.00	4.00	4.23	4.00
4.31	4.29	4.33	4.15	3.80	3.96	3.54	3.50	3.86	3.71	4.00	4.00	5.00	5.00	5.00	5.00	5.00	4.00	4.00	4.31	4.44
4.06	4.00	4.33	4.12	4.20	3.38	3.71	3.75	4.14	4.00	4.00	4.00	5.00	5.00	5.00	5.00	5.00	4.00	4.00	3.46	3.67
4.25	4.43	4.00	3.33	3.40	3.46	3.13	3.75	4.00	3.71	4.00	4.00	5.00	5.00	5.00	5.00	5.00	4.00	4.00	4.15	4.00
4.13	4.43	4.33	4.03	4.40	3.75	3.42	4.25	4.14	4.00	4.00	4.00	5.00	5.00	5.00	5.00	5.00	4.00	4.00	4.08	4.00
4.06	4.00	4.33	4.07	4.20	4.29	4.13	4.25	4.14	4.00	4.00	4.00	5.00	5.00	5.00	5.00	5.00	4.00	4.00	4.38	4.33
4.13	4.43	3.67	4.10	2.60	3.46	3.46	3.75	3.43	4.00	4.00	4.00	5.00	5.00	5.00	5.00	5.00	4.00	4.00	4.08	4.22
4.06	3.86	4.33	3.22	3.80	3.88	4.00	4.00	4.00	4.29	4.00	4.00	5.00	5.00	5.00	5.00	5.00	4.00	4.00	4.23	4.22
4.50	4.14	4.33	3.97	4.00	4.29	4.46	3.75	4.43	4.43	4.00	4.00	5.00	5.00	5.00	5.00	5.00	4.00	4.00	4.08	4.11
4.19	4.29	4.67	3.97	4.40	3.71	3.96	4.25	4.00	4.14	4.00	4.00	5.00	5.00	5.00	5.00	5.00	4.00	4.00	4.08	4.11
4.25	4.43	3.67	3.33	3.60	4.08	4.29	4.50	4.43	4.00	4.00	4.00	5.00	5.00	5.00	5.00	5.00	4.00	4.00	4.15	4.00
4.25	4.29	4.33	3.97	4.00	4.42	4.29	4.50	4.29	4.43	4.00	4.00	5.00	5.00	5.00	5.00	5.00	4.00	4.00	4.00	4.11
4.38	4.00	3.67	4.13	4.00	4.04	3.71	5.00	4.57	4.29	4.00	4.00	5.00	5.00	5.00	5.00	5.00	4.00	4.00	4.23	4.11
4.19	4.57	4.00	3.98	4.40	3.79	4.04	4.50	4.14	4.57	4.00	4.00	5.00	5.00	5.00	5.00	5.00	4.00	4.00	4.15	3.78
4.63	4.14	3.33	4.08	4.40	3.96	3.96	4.75	4.14	4.29	4.00	4.00	5.00	5.00	5.00	5.00	5.00	4.00	4.00	3.85	4.11
4.06	3.86	4.00	3.92	4.00	4.08	4.00	4.25	4.14	4.14	4.00	4.00	5.00	5.00	5.00	5.00	5.00	4.00	4.00	4.23	4.11
4.31	4.43	4.00	4.08	4.00	4.25	4.00	4.75	4.00	4.00	4.00	4.00	5.00	5.00	5.00	5.00	5.00	4.00	4.00	3.77	3.78
4.06	4.00	4.00	3.87	4.40	4.08	4.13	4.50	3.57	4.29	4.00	4.00	5.00	5.00	5.00	5.00	5.00	4.00	4.00	3.92	4.33
4.19	4.14	3.67	4.10	3.80	4.13	4.17	4.25	4.14	3.86	4.00	4.00	5.00	5.00	5.00	5.00	5.00	4.00	4.00	4.15	4.00
4.13	4.14	4.33	4.20	4.40	4.08	4.29	4.00	3.86	4.14	4.00	4.00	5.00	5.00	5.00	5.00	5.00	4.00	4.00	4.08	4.00
4.25	4.00	4.33	3.93	4.40	3.88	3.83	4.50	4.00	3.86	4.00	4.00	5.00	5.00	5.00	5.00	5.00	4.00	4.00	4.23	4.00
4.44	3.86	4.33	3.87	4.40	3.92	4.17	5.00	4.43	4.29	4.00	4.00	5.00	5.00	5.00	5.00	5.00	4.00	4.00	4.08	4.11
4.06	4.00	3.67	4.35	4.40	4.13	4.04	4.25	4.00	4.00	4.00	4.00	5.00	5.00	5.00	5.00	5.00	4.00	4.00	4.15	4.11
4.19	4.43	4.00	4.35	4.00	3.96	3.96	4.00	4.14	4.00	4.00	4.00	5.00	5.00	5.00	5.00	5.00	4.00	4.00	4.15	3.78
4.13	4.00	3.33	3.93	3.80	3.92	4.00	4.00	4.00	3.86	4.00	4.00	5.00	5.00	5.00	5.00	5.00	4.00	4.00	4.08	3.67
4.13	4.14	3.67	4.00	3.80	3.96	4.00	4.00	4.00	4.00	4.00	4.00	5.00	5.00	5.00	5.00	5.00	4.00	4.00	3.77	4.44
4.13	4.29	3.33	3.97	4.00	4.04	4.42	5.00	4.71	3.86	4.00	4.00	5.00	5.00	5.00	5.00	5.00	4.00	4.00	3.92	4.00
4.13	3.71	4.67	3.78	4.20	3.96	4.00	4.00	3.71	3.71	4.00	4.00	5.00	5.00	5.00	5.00	5.00	4.00	4.00	4.08	4.33
4.25	4.43	4.00	3.92	4.80	4.00	4.17	5.00	4.29	3.86	4.00	4.00	5.00	5.00	5.00	5.00	5.00	4.00	4.00	4.15	3.89
4.13	3.86	3.00	3.97	3.80	3.92	3.88	4.75	4.00	4.14	4.00	4.00	5.00	5.00	5.00	5.00	5.00	4.00	4.00	3.92	4.00
4.25	4.00	3.33	3.97	3.80	4.04	3.54	4.25	4.00	3.86	4.00	4.00	5.00	5.00	5.00	5.00	5.00	4.00	4.00	4.08	3.89
4.19	4.14	3.00	4.05	4.00	4.08	4.33	4.25	4.14	4.00	4.00	4.00	5.00	5.00	5.00	5.00	5.00	4.00	4.00	4.15	4.00
4.31	4.29	3.33	4.00	3.80	4.17	4.00	4.75	3.86	4.14	4.00	4.00	5.00	5.00	5.00	5.00	5.00	4.00	4.00	4.08	4.22
4.44	4.14	3.33	4.10	4.00	3.92	4.17	4.25	4.14	4.14	4.00	4.00	5.00	5.00	5.00	5.00	5.00	4.00	4.00	4.23	4.00
4.38	4.14	3.33	4.27	3.80	4.04	4.50	4.25	4.00	4.29	4.00	4.00	5.00	5.00	5.00	5.00	5.00	4.00	4.00	4.38	4.00
4.56	4.00	3.67	4.17	4.20	4.04	4.33	4.50	3.86	4.14	4.00	4.00	5.00	5.00	5.00	5.00	5.00	4.00	4.00	4.23	4.00
4.50	4.00	3.00	4.35	4.00	4.17	4.00	4.50	3.71	4.14	4.00	4.00	5.00	5.00	5.00	5.00	5.00	4.00	4.00	4.31	4.00
3.94	4.00	4.33	4.05	4.00	4.13	3.92	3.50	4.14	4.00	4.00	4.00	5.00	5.00	5.00	5.00	5.00	4.00	4.00	4.08	3.89
4.50	4.43	4.33	4.20	4.00	4.08	4.17	4.50	4.14	4.14	4.00	4.00	5.00	5.00	5.00	5.00	5.00	4.00	4.00	4.08	3.78
4.25	3.71	4.67	4.13	4.00	4.13	3.79	3.75	4.57	3.71	4.00	4.00	5.00	5.00	5.00	5.00	5.00	4.00	4.00	4.00	4.00
4.63	4.71	4.00	3.80	3.80	4.25	4.04	4.25	3.71	4.00	4.00	4.00	5.00	5.00	5.00	5.00	5.00	4.00	4.00	4.08	4.00
4.50	4.43	3.00	3.83	4.00	3.88	4.00	4.00	4.29	4.00	4.00	4.00	5.00	5.00	5.00	5.00	5.00	4.00	4.00	4.23	4.00
4.00	4.00	4.00	3.97	3.80	4.04	4.04	4.25	4.14	4.14	4.00	4.00	5.00	5.00	5.00	5.00	5.00	4.00	4.00	4.08	4.33
4.00	4.00	4.00	3.88	4.40	4.08	3.75	4.25	4.14	3.71	4.00	4.00	5.00	5.00	5.00	5.00	5.00	4.00	4.00	4.15	4.33
4.06	3.86	4.00	4.10	4.60	4.25	4.29	4.00	4.14	4.43	4.00	4.00	5.00	5.00	5.00	5.00	5.00	4.00	4.00	4.15	4.11
4.50	4.57	4.33	4.23	4.40	4.25	4.42	4.75	4.43	4.43	4.00	4.00	5.00	5.00	5.00	5.00	5.00	4.00	4.00	4.31	4.11
4.56	4.71	4.67	3.92	4.00	4.04	4.33	4.00	4.71	4.00	4.00	4.00	5.00	5.00	5.00	5.00	5.00	4.00	4.00	4.23	4.00
4.50	4.29	4.00	4.12	3.80	4.25	4.17	5.00	4.29	4.43	4.00	4.00	5.00	5.00	5.00	5.00	5.00	4.00	4.00	4.15	3.89
4.56	4.57	3.67	3.80	4.00	4.17	3.75	4.75	4.29	3.71	4.00	4.00	5.00	5.00	5.00	5.00	5.00	4.00	4.00	4.15	4.00
4.81	4.14	3.67	3.88	4.00	4.04	4.08	4.25	4.14	4.00	4.00	4.00	5.00	5.00	5.00	5.00	5.00	4.00	4.00	4.08	3.89
4.81	4.57	5.00	4.48	4.80	4.67	4.75	5.00	4.71	4.71	4.00	4.00	5.00	5.00	5.00	5.00	5.00	4.00	4.00	4.85	4.56
4.63	4.71	5.00	4.60	4.80	4.79	4.46	4.75	4.71	4.57	4.00	4.00	5.00	5.00	5.00	5.00	5.00	4.00	4.00	4.62	4.33
4.88	4.86	4.67	4.73	5.00	4.75	4.88	5.00	4.86	4.57	4.00	4.00	5.00	5.00	5.00	5.00	5.00	4.00	4.00	4.92	4.78
4.81	4.86	4.67	4.73	4.60	4.63	4.71	4.75	4.86	4.71	4.00	4.00	5.00	5.00	5.00	5.00	5.00	4.00	4.00	4.62	4.78
4.75	4.71	5.00	4.78	4.80	4.83	4.83	4.75	5.00	4.71	4.00	4.00	5.00	5.00	5.00	5.00	5.00	4.00	4.00	4.77	4.89
4.56	4.57	3.33	4.27	3.80	3.88	3.75	4.25	4.00	4.00	4.00	4.00	5.00	5.00	5.00	5.00	5.00	4.00	4.00	4.08	3.89
4.00	4.00	4.33	3.42	2.80	3.29	3.42	3.75	4.14	4.29	4.00	4.00	5.00	5.00	5.00	5.00	5.00	4.00	4.00	4.23	3.44
4.13	4.14	3.67	3.85	2.80	3.71	3.96	4.25	4.29	3.86	4.00	4.00	5.00	5.00	5.00	5.00	5.00	4.00	4.00	3.92	3.67
4.06	4.14	4.33	4.18	4.40	3.04	2.58	2.50	3.29	3.43	4.00	4.00	5.00	5.00	5.00	5.00	5.00	4.00	4.00	3.77	3.67
4.13	4.29	4.00	4.22	4.20	4.17	4.04	4.25	4.29	4.00	4.00	4.00	5.00	5.00	5.00	5.00	5.00	4.00	4.00	4.08	3.78
3.88	4.14	4.33	4.30	4.20	4.29	4.29	4.25	3.29	3.29	4.00	4.00	5.00	5.00	5.00	5.00	5.00	4.00	4.00	3.54	3.67
4.00	4.29	4.33	4.22	4.20	3.88	4.29	4.25	4.14	3.86	4.00	4.00	5.00	5.00	5.00	5.00	5.00	4.00	4.00	3.85	3.78
4.25	4.29	4.33	3.92	2.80	4.00	3.88	3.50	3.57	4.00	4.00	4.00	5.00	5.00	5.00	5.00	5.00	4.00	4.00	3.92	3.78
4.13	4.43	4.33	4.07	4.20	4.42	4.29	4.25	4.14	3.86	4.00	4.00	5.00	5.00	5.00	5.00	5.00	4.00	4.00	4.23	4.22
4.50	4.00	3.00	4.13	4.00	4.13	3.88	4.25	4.00	4.00	4.00	4.00	5.00	5.00	5.00	5.00	5.00	4.00	4.00	4.00	4.00
4.06	4.00	3.33	4.07	3.60	4.08	4.50	4.00	4.00	4.14	4.00	4.00	5.00	5.00	5.00	5.00	5.00	4.00	4.00	4.15	3.89
4.25	3.86	3.67	3.73	4.00	4.08	4.04	4.25	4.00	4.00	4.00	4.00	5.00	5.00	5.00	5.00	5.00	4.00	4.00	4.08	3.89
4.38	4.00	3.33	4.03	4.00	4.13	4.17	4.50	4.29	3.86	4.00	4.00	5.00	5.00	5.00	5.00	5.00	4.00	4.00	4.23	3.89
4.56	3.86	3.67	4.07	3.60	3.79	3.88	4.00	4.00	4.14	4.00	4.00	5.00	5.00	5.00	5.00	5.00	4.00	4.00	4.15	3.56
4.38	4.14	3.67	4.15	4.00	3.92	4.00	4.00	4.00	4.14	4.00	4.00	5.00	5.00	5.00	5.00	5.00	4.00	4.00	4.00	3.89
4.19	4.29	4.00	4.02	4.00	4.13	3.92	4.25	4.00	4.43	4.00	4.00	5.00	5.00	5.00	5.00	5.00	4.00	4.00	4.08	3.78
4.25	4.29	4.33	4.20	4.00	4.38	4.29	4.50	4.29	4.00	4.00	4.00	5.00	5.00	5.00	5.00	5.00	4.00	4.00	4.15	4.11
4.44	3.86	3.00	4.18	4.00	3.96	4.00	4.25	3.86	4.14	4.00	4.00	5.00	5.00	5.00	5.00	5.00	4.00	4.00	4.08	3.78
4.06	4.00	3.67	4.00	3.80	3.96	4.00	4.00	4.00	4.14	4.00	4.00	5.00	5.00	5.00	5.00	5.00	4.00	4.00	4.00	3.89
4.25	3.86	3.33	4.02	3.40	3.92	3.83	4.25	3.86	4.14	4.00	4.00	5.00	5.00	5.00	5.00	5.00	4.00	4.00	4.15	4.00
3.81	4.00	4.33	3.83	4.20	4.13	4.00	4.25	4.29	4.14	4.00	4.00	5.00	5.00	5.00	5.00	5.00	4.00	4.00	3.85	4.00
4.13	3.71	3.33	3.80	4.00	4.00	3.75	4.00	4.29	4.29	4.00	4.00	5.00	5.00	5.00	5.00	5.00	4.00	4.00	4.23	4.00
3.94	4.00	4.00	3.87	4.00	4.04	4.00	4.25	4.14	4.00	4.00	4.00	5.00	5.00	5.00	5.00	5.00	4.00	4.00	4.08	4.11
4.44	3.86	3.33	4.28	3.00	3.92	3.83	4.50	3.86	4.29	4.00	4.00	5.00	5.00	5.00	5.00	5.00	4.00	4.00	3.69	3.89
4.00	4.00	4.33	4.15	3.60	4.17	4.29	4.00	4.43	4.00	4.00	4.00	5.00	5.00	5.00	5.00	5.00	4.00	4.00	4.23	4.00
4.31	3.71	3.67	4.05	3.80	3.96	3.71	4.00	3.57	4.14	4.00	4.00	5.00	5.00	5.00	5.00	5.00	4.00	4.00	4.23	3.78
3.88	4.29	4.33	4.13	4.00	4.04	3.58	4.00	4.14	4.00	4.00	4.00	5.00	5.00	5.00	5.00	5.00	4.00	4.00	4.15	4.11
4.25	3.86	4.67	3.98	3.40	3.96	3.67	4.50	4.14	4.29	4.00	4.00	5.00	5.00	5.00	5.00	5.00	4.00	4.00	4.23	4.00
4.13	4.00	4.33	4.13	3.60	4.04	4.08	4.00	3.71	4.14	4.00	4.00	5.00	5.00	5.00	5.00	5.00	4.00	4.00	3.85	4.11
4.50	4.29	3.67	4.13	3.40	3.79	4.00	4.75	4.14	4.14	4.00	4.00	5.00	5.00	5.00	5.00	5.00	4.00	4.00	4.15	3.89
3.94	4.43	4.33	3.82	3.80	3.75	3.88	3.50	3.86	3.57	4.00	4.00	5.00	5.00	5.00	5.00	5.00	4.00	4.00	4.08	4.11
4.00	3.86	4.00	3.93	4.60	3.96	3.96	3.50	4.43	3.86	4.00	4.00	5.00	5.00	5.00	5.00	5.00	4.00	4.00	3.92	4.11
3.88	4.00	4.67	3.87	4.00	4.04	3.96	4.25	3.86	3.86	4.00	4.00	5.00	5.00	5.00	5.00	5.00	4.00	4.00	4.15	4.11
4.31	4.00	4.67	3.97	3.60	4.17	4.00	4.50	4.00	4.14	4.00	4.00	5.00	5.00	5.00	5.00	5.00	4.00	4.00	3.92	4.11
4.25	4.14	4.00	4.15	4.00	3.96	4.00	4.25	4.00	4.00	4.00	4.00	5.00	5.00	5.00	5.00	5.00	4.00	4.00	4.00	4.22
4.00	4.29	4.67	4.10	4.00	4.00	4.29	3.75	4.14	3.86	4.00	4.00	5.00	5.00	5.00	5.00	5.00	4.00	4.00	4.23	4.22
3.75	4.29	3.67	4.05	3.80	4.04	3.67	4.50	3.86	3.86	4.00	4.00	5.00	5.00	5.00	5.00	5.00	4.00	4.00	4.00	4.00
4.44	4.14	3.00	4.10	3.40	4.04	4.29	4.50	4.14	4.14	4.00	4.00	5.00	5.00	5.00	5.00	5.00	4.00	4.00	4.08	4.11
4.31	3.86	4.33	4.02	3.80	3.83	3.88	4.25	3.71	3.71	4.00	4.00	5.00	5.00	5.00	5.00	5.00	4.00	4.00	3.92	4.00
4.38	4.29	3.67	4.05	4.40	4.04	4.42	4.50	4.14	4.43	4.00	4.00	5.00	5.00	5.00	5.00	5.00	4.00	4.00	4.08	3.78
4.38	3.71	4.33	4.07	4.00	4.04	4.00	4.25	3.86	4.00	4.00	4.00	5.00	5.00	5.00	5.00	5.00	4.00	4.00	3.85	4.00
4.31	3.71	4.00	3.88	3.80	4.17	3.88	4.00	4.43	4.14	4.00	4.00	5.00	5.00	5.00	5.00	5.00	4.00	4.00	4.08	3.67
4.25	3.86	4.00	3.87	4.00	4.04	4.13	4.25	3.86	3.86	4.00	4.00	5.00	5.00	5.00	5.00	5.00	4.00	4.00	3.85	3.78
4.81	4.71	4.67	4.37	5.00	4.58	4.88	4.75	4.71	4.86	4.00	4.00	5.00	5.00	5.00	5.00	5.00	4.00	4.00	4.77	4.89
4.81	4.43	5.00	4.77	4.80	4.75	4.71	4.75	4.71	4.86	4.00	4.00	5.00	5.00	5.00	5.00	5.00	4.00	4.00	4.77	4.56
4.31	4.29	4.00	4.45	4.40	4.38	4.25	4.25	4.43	4.14	4.00	4.00	5.00	5.00	5.00	5.00	5.00	4.00	4.00	4.38	4.11
4.69	4.71	4.67	4.52	4.80	4.71	4.83	4.75	4.57	4.57	4.00	4.00	5.00	5.00	5.00	5.00	5.00	4.00	4.00	4.62	4.56
4.50	4.57	4.67	4.58	4.80	4.42	4.71	4.75	4.57	4.57	4.00	4.00	5.00	5.00	5.00	5.00	5.00	4.00	4.00	4.46	4.78
4.75	4.71	4.67	4.65	4.60	4.67	4.71	4.50	4.57	4.71	4.00	4.00	5.00	5.00	5.00	5.00	5.00	4.00	4.00	4.62	4.78
3.75	4.00	4.00	4.03	3.80	3.54	3.71	3.75	3.57	3.86	4.00	4.00	5.00	5.00	5.00	5.00	5.00	4.00	4.00	3.85	3.44
4.81	4.86	4.67	4.70	4.40	4.67	4.54	4.50	4.57	4.71	4.00	4.00	5.00	5.00	5.00	5.00	5.00	4.00	4.00	4.85	4.67
3.81	4.00	3.67	4.30	4.00	3.88	3.42	4.50	3.86	3.86	4.00	4.00	5.00	5.00	5.00	5.00	5.00	4.00	4.00	4.00	3.67
4.56	4.43	4.00	4.50	4.40	4.54	4.46	4.50	4.57	4.71	4.00	4.00	5.00	5.00	5.00	5.00	5.00	4.00	4.00	4.38	4.56
4.81	4.71	4.67	4.77	5.00	4.75	5.00	4.75	4.86	4.71	4.00	4.00	5.00	5.00	5.00	5.00	5.00	4.00	4.00	4.85	4.89
3.69	3.86	4.00	4.12	3.80	3.58	4.17	4.50	3.71	3.71	4.00	4.00	5.00	5.00	5.00	5.00	5.00	4.00	4.00	3.77	3.67
4.75	4.86	5.00	4.52	4.20	4.54	4.71	4.75	4.71	4.29	4.00	4.00	5.00	5.00	5.00	5.00	5.00	4.00	4.00	4.69	4.56
3.88	4.14	3.67	4.22	4.20	3.79	3.83	3.50	4.14	3.71	4.00	4.00	5.00	5.00	5.00	5.00	5.00	4.00	4.00	3.85	3.78
4.81	4.86	4.67	4.57	4.80	4.75	4.71	5.00	4.71	4.71	4.00	4.00	5.00	5.00	5.00	5.00	5.00	4.00	4.00	4.77	4.78
4.69	4.71	4.67	4.78	4.60	4.83	4.88	4.75	4.71	4.71	4.00	4.00	5.00	5.00	5.00	5.00	5.00	4.00	4.00	4.85	4.78
3.88	3.71	3.33	4.23	4.00	3.79	3.63	3.75	4.29	3.86	4.00	4.00	5.00	5.00	5.00	5.00	5.00	4.00	4.00	4.00	3.78
4.50	4.57	4.67	4.33	4.80	4.42	4.58	4.75	4.57	4.71	4.00	4.00	5.00	5.00	5.00	5.00	5.00	4.00	4.00	4.62	4.33
4.00	4.00	3.67	3.90	3.60	3.67	3.58	3.50	3.57	3.43	4.00	4.00	5.00	5.00	5.00	5.00	5.00	4.00	4.00	3.92	3.89
3.69	4.14	4.00	3.75	4.00	3.79	4.04	3.75	3.71	4.00	4.00	4.00	5.00	5.00	5.00	5.00	5.00	4.00	4.00	4.15	4.22
4.56	4.29	5.00	4.32	4.60	4.63	4.71	4.50	4.57	4.71	4.00	4.00	5.00	5.00	5.00	5.00	5.00	4.00	4.00	4.62	4.78
3.81	3.86	4.33	3.97	3.80	4.08	3.71	4.25	4.14	3.86	4.00	4.00	5.00	5.00	5.00	5.00	5.00	4.00	4.00	3.69	3.78
4.69	4.57	4.67	4.43	4.80	4.67	4.75	4.50	4.71	4.43	4.00	4.00	5.00	5.00	5.00	5.00	5.00	4.00	4.00	4.62	4.67
4.00	3.86	3.67	4.17	3.80	3.75	4.00	4.00	4.00	3.86	4.00	4.00	5.00	5.00	5.00	5.00	5.00	4.00	4.00	4.46	3.67
3.94	3.71	4.33	3.98	4.20	4.13	4.25	4.00	3.71	4.00	4.00	4.00	5.00	5.00	5.00	5.00	5.00	4.00	4.00	4.46	4.44
4.13	4.00	4.00	4.03	4.20	3.71	4.04	3.75	3.86	4.00	4.00	4.00	5.00	5.00	5.00	5.00	5.00	4.00	4.00	4.08	3.67
4.56	4.57	4.67	4.52	4.60	4.71	4.71	4.50	4.71	4.43	4.00	4.00	5.00	5.00	5.00	5.00	5.00	4.00	4.00	4.62	4.56
4.00	3.86	4.33	4.17	3.80	4.00	3.75	3.75	3.86	3.86	4.00	4.00	5.00	5.00	5.00	5.00	5.00	4.00	4.00	4.23	4.11
4.38	4.14	4.00	4.25	4.40	3.83	4.04	4.25	3.86	3.86	4.00	4.00	5.00	5.00	5.00	5.00	5.00	4.00	4.00	4.15	4.00
4.63	4.00	3.67	4.12	4.00	3.88	3.67	4.75	4.00	4.14	4.00	4.00	5.00	5.00	5.00	5.00	5.00	4.00	4.00	4.23	4.11
4.69	4.57	4.67	4.47	4.60	4.67	4.71	4.75	4.71	4.57	4.00	4.00	5.00	5.00	5.00	5.00	5.00	4.00	4.00	4.62	4.44
4.38	4.00	4.00	4.35	4.20	4.21	4.21	4.00	4.14	4.00	4.00	4.00	5.00	5.00	5.00	5.00	5.00	4.00	4.00	3.92	4.00
4.50	3.71	3.00	4.17	4.00	3.71	3.88	4.25	3.86	4.14	4.00	4.00	5.00	5.00	5.00	5.00	5.00	4.00	4.00	4.00	4.00
4.63	4.57	4.67	4.48	4.80	4.67	4.67	4.50	4.71	4.57	4.00	4.00	5.00	5.00	5.00	5.00	5.00	4.00	4.00	4.69	4.67
4.25	4.14	3.00	4.13	4.00	3.88	4.00	4.25	4.57	3.86	4.00	4.00	5.00	5.00	5.00	5.00	5.00	4.00	4.00	4.08	3.89
4.31	4.43	3.67	3.85	3.80	4.08	3.83	4.25	3.86	3.86	4.00	4.00	5.00	5.00	5.00	5.00	5.00	4.00	4.00	4.15	4.00
4.19	4.43	3.00	3.95	4.00	4.13	4.17	4.00	4.14	4.43	4.00	4.00	5.00	5.00	5.00	5.00	5.00	4.00	4.00	4.08	4.00
4.50	3.86	3.33	4.12	3.60	4.04	3.79	4.25	4.29	3.86	4.00	4.00	5.00	5.00	5.00	5.00	5.00	4.00	4.00	4.00	4.00
4.50	4.57	4.67	4.47	4.60	4.75	4.46	4.50	4.43	4.57	4.00	4.00	5.00	5.00	5.00	5.00	5.00	4.00	4.00	4.62	4.44
4.38	4.57	3.33	4.22	3.80	3.79	4.00	4.25	3.71	4.14	4.00	4.00	5.00	5.00	5.00	5.00	5.00	4.00	4.00	4.00	4.00
4.19	3.71	3.00	3.80	3.60	3.88	4.04	4.50	4.14	4.00	4.00	4.00	5.00	5.00	5.00	5.00	5.00	4.00	4.00	4.08	4.00
4.38	4.29	3.67	3.85	3.80	3.75	4.00	4.25	3.86	4.14	4.00	4.00	5.00	5.00	5.00	5.00	5.00	4.00	4.00	4.08	4.00
4.63	4.14	3.00	4.15	4.00	4.21	4.00	4.50	3.86	4.00	4.00	4.00	5.00	5.00	5.00	5.00	5.00	4.00	4.00	4.23	3.89
4.31	4.14	3.00	4.00	3.80	3.96	3.83	4.25	4.00	4.14	4.00	4.00	5.00	5.00	5.00	5.00	5.00	4.00	4.00	3.92	3.67
4.25	4.14	3.00	3.93	4.00	3.67	3.88	4.25	3.71	4.29	4.00	4.00	5.00	5.00	5.00	5.00	5.00	4.00	4.00	4.15	4.00
4.38	4.43	3.00	3.88	3.80	3.83	4.00	4.50	3.86	4.14	4.00	4.00	5.00	5.00	5.00	5.00	5.00	4.00	4.00	4.08	3.89
4.38	4.00	3.67	3.75	4.20	4.13	3.88	4.50	4.00	4.14	4.00	4.00	5.00	5.00	5.00	5.00	5.00	4.00	4.00	4.08	4.00
4.31	4.29	3.00	4.00	4.00	4.00	4.17	4.25	4.00	4.00	4.00	4.00	5.00	5.00	5.00	5.00	5.00	4.00	4.00	4.15	3.78

## Sheet: EFASPSS
Rotated Component Matrixa
	Component
	1	2
KI1	0.279	0.803
KI2	0.315	0.798
KI3	0.270	0.793
KI4	0.603	0.356
KI5	0.562	0.483
KP1	0.220	0.849
KP2	0.228	0.855
KP3	0.478	0.683
KP4	0.605	0.515
KP5	0.282	0.752
KP6	0.485	0.479
KP7	0.514	0.543
KP8	0.509	0.649
KO1	0.794	0.276
KO2	0.797	0.363
KO3	0.777	0.398
KO4	0.831	0.135
KU1	0.803	0.363
KU2	0.665	0.513
KU3	0.770	0.335
KU4	0.886	0.144
KU5	0.592	0.454
Extraction Method: Principal Component Analysis. Rotation Method: Varimax with Kaiser Normalization.
a. Rotation converged in 3 iterations.
